# Supplementary material
Source: PubMed Central journal article supplement (PMC7305791)
Supplement: supplemental_table_ioz155.pdf [file supplemental_table_ioz155.pdf]

| chromoson | start     | end       | gene      | direction | log2 fold | pvalue   | qvalue   | Type        |
|-----------|-----------|-----------|-----------|-----------|-----------|----------|----------|-------------|
| chr1      | 161589801 | 161590800 |           | Up        | 1.46      | 5.32E-05 | 0.006524 | Intergenic  |
| chr1      | 96219001  | 96220000  | Sult2b1   | Up        | 1.39      | 1.98E-05 | 0.003224 | Genebody    |
| chr2      | 51590201  | 51591200  | Nnt       | Up        | 1.36      | 2.10E-05 | 0.003377 | 1k promote  |
| chr10     | 75961801  | 75962800  | Rnf43     | Up        | 1.28      | 7.46E-05 | 0.008257 | Genebody    |
| chr4      | 116776601 | 116777600 | Tacr1     | Up        | 1.26      | 2.92E-05 | 0.004258 | Genebody    |
| chr5      | 172949701 | 172950800 | RGD13115  | Up        | 1.2       | 2.62E-05 | 0.003932 | 3k promote  |
| chr8      | 113974001 | 113975000 | Col7a1    | Up        | 1.2       | 5.39E-05 | 0.006601 | Genebody    |
| chr12     | 18711901  | 18713700  |           | Up        | 1.2       | 3.74E-05 | 0.0051   | Intergenic  |
| chr18     | 29447601  | 29448600  | Ik        | Up        | 1.19      | 8.69E-05 | 0.009183 | Genebody    |
| chr1      | 243734101 | 243735900 |           | Up        | 1.15      | 8.58E-07 | 0.00035  | Intergenic  |
| chr1      | 75118501  | 75120300  |           | Up        | 1.14      | 3.72E-05 | 0.005086 | Intergenic  |
| chr4      | 184156901 | 184158200 | Zfp64     | Up        | 1.13      | 4.17E-05 | 0.005523 | Genebody    |
| chr1      | 244104301 | 244105300 |           | Up        | 1.13      | 1.85E-05 | 0.003065 | Intergenic  |
| chr3      | 160019801 | 160020800 | Ppp1r16b  | Up        | 1.12      | 6.75E-05 | 0.007749 | Genebody    |
| chr3      | 149459701 | 149460700 | Fdps      | Up        | 1.1       | 7.06E-05 | 0.007979 | Genebody    |
| chr7      | 101246401 | 101247500 | Kcnq2     | Up        | 1.07      | 2.74E-05 | 0.004068 | Genebody    |
| chr1      | 75685601  | 75687200  |           | Up        | 1.06      | 4.83E-05 | 0.006124 | Intergenic  |
| chr2      | 181170601 | 181171600 | Fam49b    | Up        | 1.04      | 5.79E-05 | 0.006959 | Genebody    |
| chr1      | 73406401  | 73407400  | Adora1    | Up        | 1.03      | 0.00016  | 0.015602 | 3k promote  |
| chr3      | 170229001 | 170230000 | Zfp112    | Up        | 1.03      | 7.77E-05 | 0.008503 | Genebody    |
| chr5      | 172949701 | 172950800 | Edn1      | Up        | 1.02      | 0.000162 | 0.015792 | 3k promote  |
| chr18     | 24568701  | 24569800  | Fyn       | Up        | 1.02      | 4.88E-05 | 0.006167 | Genebody    |
| chr10     | 79147401  | 79148400  |           | Up        | 1.02      | 6.83E-05 | 0.007808 | Intergenic  |
| chr1      | 79337501  | 79338500  | Map2k2    | Up        | 1.01      | 5.57E-05 | 0.006763 | Genebody    |
| chr2      | 217905901 | 217907500 | Slc26a6   | Up        | 1.01      | 8.27E-05 | 0.008903 | Genebody    |
| chr16     | 47222601  | 47223600  |           | Up        | 1.01      | 6.35E-05 | 0.007414 | Intergenic  |
| chr4      | 132017601 | 132018600 |           | Up        | 1.01      | 9.01E-05 | 0.009421 | Intergenic  |
| chr16     | 78939301  | 78940300  |           | Up        | 1         | 9.78E-05 | 0.009917 | Intergenic  |
| chr1      | 8357801   | 8358800   | Nxph1     | Up        | 1         | 1.89E-05 | 0.003109 | proximal pr |
| chr20     | 43623301  | 43624300  | Proc      | Up        | 0.99      | 5.20E-05 | 0.006426 | Genebody    |
| chr6      | 46565001  | 46566000  |           | Up        | 0.98      | 9.56E-05 | 0.009753 | Intergenic  |
| chr13     | 47190801  | 47192000  | Tfap2a    | Up        | 0.96      | 7.19E-05 | 0.008098 | 3k promote  |
| chr7      | 10081401  | 10082400  | RGD15623  | Up        | 0.96      | 2.32E-05 | 0.003627 | Genebody    |
| chr9      | 34811401  | 34812400  |           | Up        | 0.96      | 4.14E-05 | 0.005495 | Intergenic  |
| chr13     | 74787101  | 74788100  |           | Up        | 0.95      | 4.50E-05 | 0.005831 | Intergenic  |
| chr8      | 113930601 | 113931600 | Mgat4b    | Up        | 0.94      | 4.32E-05 | 0.005663 | Genebody    |
| chr19     | 35531901  | 35532900  | Acd       | Up        | 0.93      | 1.62E-05 | 0.00279  | 1k promote  |
| chr10     | 11517801  | 11519200  |           | Up        | 0.93      | 2.67E-05 | 0.003996 | Intergenic  |
| chr7      | 131720001 | 131721000 |           | Up        | 0.93      | 5.24E-05 | 0.006469 | Intergenic  |
| chr4      | 173521801 | 173523000 |           | Up        | 0.92      | 2.14E-05 | 0.003422 | Intergenic  |
| chr16     | 69055801  | 69057400  | Fgfr1op2  | Up        | 0.91      | 5.10E-05 | 0.006341 | Genebody    |
| chr4      | 61664601  | 61665700  |           | Up        | 0.9       | 1.62E-05 | 0.00279  | Intergenic  |
| chr19     | 55781701  | 55783100  |           | Up        | 0.9       | 3.14E-05 | 0.004483 | Intergenic  |
| chr2      | 199059801 | 199060800 | Cd2       | Up        | 0.89      | 6.51E-05 | 0.007549 | Genebody    |
| chr18     | 79174701  | 79175700  |           | Up        | 0.89      | 9.22E-05 | 0.009562 | Intergenic  |
| chr2      | 155427001 | 155428100 |           | Up        | 0.89      | 0.000106 | 0.010659 | Intergenic  |
| chr2      | 235407301 | 235408800 | Map2k1ip1 | Up        | 0.88      | 0.000168 | 0.01643  | 1k promote  |

|       |           |           |           |    |      |          |          |             |
|-------|-----------|-----------|-----------|----|------|----------|----------|-------------|
| chr6  | 132355401 | 132356500 | Chrn3     | Up | 0.88 | 0.000278 | 0.02658  | Genebody    |
| chr13 | 68598901  | 68599900  |           | Up | 0.88 | 5.80E-05 | 0.006964 | Intergenic  |
| chr4  | 34023501  | 34024500  | Atp6v1b2  | Up | 0.88 | 4.92E-05 | 0.006199 | proximal pr |
| chrX  | 134804501 | 134805500 |           | Up | 0.87 | 3.64E-05 | 0.005002 | Intergenic  |
| chr10 | 35782001  | 35783000  | Alg14     | Up | 0.86 | 4.48E-05 | 0.005813 | Genebody    |
| chr7  | 31731401  | 31732600  | Bcl11b    | Up | 0.86 | 6.40E-05 | 0.007464 | Genebody    |
| chr17 | 28311701  | 28312800  | Lefty1    | Up | 0.85 | 7.35E-05 | 0.008214 | 3k promote  |
| chr2  | 196571001 | 196572000 | Cnn3      | Up | 0.85 | 1.39E-05 | 0.002477 | Genebody    |
| chr2  | 180676801 | 180677900 | Itpr1     | Up | 0.85 | 4.40E-05 | 0.005738 | Genebody    |
| chr4  | 144019001 | 144020100 | Arid5b    | Up | 0.85 | 6.74E-05 | 0.007742 | Genebody    |
| chr10 | 61857501  | 61858900  |           | Up | 0.85 | 2.52E-05 | 0.003834 | Intergenic  |
| chr1  | 195935801 | 195936800 |           | Up | 0.85 | 5.85E-05 | 0.006996 | Intergenic  |
| chr6  | 79826901  | 79827900  |           | Up | 0.85 | 8.27E-05 | 0.008901 | Intergenic  |
| chr20 | 21187801  | 21188800  | Gtdc1     | Up | 0.84 | 1.02E-05 | 0.001995 | Genebody    |
| chr9  | 32552701  | 32553900  | Ubqln4    | Up | 0.84 | 7.03E-05 | 0.007954 | Genebody    |
| chr17 | 30014101  | 30015100  | Tex101    | Up | 0.83 | 3.67E-05 | 0.005038 | 3k promote  |
| chr3  | 109413901 | 109415200 |           | Up | 0.82 | 1.75E-05 | 0.002945 | Intergenic  |
| chr13 | 96662501  | 96663700  | Tifab     | Up | 0.81 | 3.28E-05 | 0.004639 | 3k promote  |
| chr9  | 106395201 | 106396300 | Olah      | Up | 0.81 | 9.98E-05 | 0.010051 | Genebody    |
| chr3  | 25254901  | 25256000  | Tmcc3     | Up | 0.81 | 0.000124 | 0.012304 | Genebody    |
| chr2  | 218066701 | 218067800 | Ptprm     | Up | 0.81 | 0.000244 | 0.023523 | Genebody    |
| chr2  | 107364401 | 107365500 |           | Up | 0.81 | 5.87E-05 | 0.007006 | Intergenic  |
| chr7  | 72710201  | 72711200  |           | Up | 0.81 | 5.93E-05 | 0.007059 | Intergenic  |
| chr16 | 22344101  | 22345100  | Capza1    | Up | 0.81 | 4.26E-05 | 0.005608 | proximal pr |
| chr1  | 82768701  | 82769700  | Map3k10   | Up | 0.8  | 1.16E-05 | 0.002176 | 1k promote  |
| chr17 | 86013101  | 86014100  | Ica1l     | Up | 0.8  | 7.96E-05 | 0.008631 | Genebody    |
| chr15 | 75482701  | 75484200  |           | Up | 0.8  | 2.16E-05 | 0.003441 | Intergenic  |
| chr1  | 154562601 | 154563900 |           | Up | 0.8  | 0.000107 | 0.010729 | Intergenic  |
| chr1  | 79949601  | 79950600  | Ube2cbp   | Up | 0.79 | 8.71E-05 | 0.009187 | 3k promote  |
| chr1  | 101666101 | 101667100 |           | Up | 0.79 | 8.13E-06 | 0.00167  | Intergenic  |
| chr5  | 136310201 | 136311200 | Faah      | Up | 0.78 | 8.65E-05 | 0.009176 | 1k promote  |
| chr2  | 200125201 | 200126200 | Mtmr7     | Up | 0.77 | 2.46E-05 | 0.003775 | proximal pr |
| chr9  | 58558901  | 58559900  | Zfp451    | Up | 0.76 | 2.06E-05 | 0.003332 | Genebody    |
| chr1  | 84348701  | 84349800  | Catsperg1 | Up | 0.76 | 7.65E-05 | 0.008403 | Genebody    |
| chr1  | 265308001 | 265309000 | Hspa12a   | Up | 0.76 | 7.85E-05 | 0.008543 | Genebody    |
| chr16 | 54981501  | 54982700  | Rnf167    | Up | 0.76 | 6.40E-05 | 0.007457 | proximal pr |
| chr16 | 81280701  | 81282000  | RGD13070  | Up | 0.75 | 3.96E-06 | 0.000976 | 1k promote  |
| chr2  | 219682101 | 219683100 | Usp53     | Up | 0.75 | 2.99E-05 | 0.004331 | 1k promote  |
| chr17 | 14410701  | 14411800  | LOC49988  | Up | 0.75 | 9.99E-05 | 0.010051 | 3k promote  |
| chr4  | 48042301  | 48043300  | Kcnd2     | Up | 0.75 | 9.83E-05 | 0.009951 | Genebody    |
| chr10 | 57526501  | 57527500  | Dtwd2     | Up | 0.75 | 3.53E-06 | 0.000902 | proximal pr |
| chr12 | 37140401  | 37141400  | Tpcn1     | Up | 0.74 | 9.77E-06 | 0.001928 | 1k promote  |
| chr4  | 5903201   | 5904300   |           | Up | 0.74 | 4.73E-05 | 0.006028 | Intergenic  |
| chr15 | 85541101  | 85542200  |           | Up | 0.73 | 1.62E-05 | 0.002788 | Intergenic  |
| chr5  | 171657801 | 171659100 |           | Up | 0.73 | 0.000222 | 0.021372 | Intergenic  |
| chr7  | 122223001 | 122224200 | Parvb     | Up | 0.72 | 4.63E-05 | 0.005938 | 1k promote  |
| chr8  | 91706101  | 91707100  | Ap1s3     | Up | 0.72 | 1.84E-05 | 0.003064 | 3k promote  |
| chr17 | 95535001  | 95536100  | Shh       | Up | 0.71 | 2.89E-05 | 0.004225 | Genebody    |

|       |           |           |          |    |      |          |          |             |
|-------|-----------|-----------|----------|----|------|----------|----------|-------------|
| chr4  | 2209401   | 2210400   | Ctbp1    | Up | 0.71 | 3.99E-05 | 0.00534  | Genebody    |
| chrX  | 81532601  | 81533700  |          | Up | 0.71 | 2.00E-05 | 0.003241 | Intergenic  |
| chr1  | 263178001 | 263179000 |          | Up | 0.71 | 2.83E-05 | 0.004169 | Intergenic  |
| chr3  | 18148501  | 18149700  |          | Up | 0.71 | 2.84E-05 | 0.004175 | Intergenic  |
| chr7  | 47984901  | 47986500  |          | Up | 0.71 | 4.79E-05 | 0.006087 | Intergenic  |
| chr3  | 145881801 | 145882900 |          | Up | 0.7  | 0.000529 | 0.049931 | Intergenic  |
| chr18 | 44717901  | 44719200  | RGD13116 | Up | 0.7  | 4.53E-06 | 0.00108  | proximal pr |
| chr16 | 82801601  | 82802700  | Pgm2l1   | Up | 0.7  | 7.03E-05 | 0.007957 | proximal pr |
| chr1  | 9195201   | 9196200   |          | Up | 0.69 | 2.82E-05 | 0.004161 | Intergenic  |
| chr10 | 107786601 | 107787600 |          | Up | 0.69 | 9.12E-05 | 0.009488 | Intergenic  |
| chr1  | 147124401 | 147125700 | Crebzf   | Up | 0.68 | 0.000124 | 0.012269 | 1k promote  |
| chr7  | 111538201 | 111539200 |          | Up | 0.68 | 9.09E-05 | 0.009474 | Intergenic  |
| chr1  | 206680201 | 206681200 | Cdk2ap2  | Up | 0.67 | 5.44E-05 | 0.006642 | 1k promote  |
| chr5  | 39893301  | 39894500  |          | Up | 0.67 | 1.54E-05 | 0.002692 | Intergenic  |
| chr1  | 157605301 | 157606300 | Fbxo23   | Up | 0.67 | 6.01E-05 | 0.007123 | proximal pr |
| chr12 | 33231901  | 33233200  | Snrnp35  | Up | 0.66 | 2.72E-05 | 0.004041 | 1k promote  |
| chr7  | 136474801 | 136475800 | Rapgef3  | Up | 0.66 | 5.30E-05 | 0.006517 | 1k promote  |
| chr18 | 24054101  | 24055200  |          | Up | 0.66 | 2.43E-06 | 0.000686 | Intergenic  |
| chr3  | 88858701  | 88859800  | Abtb2    | Up | 0.65 | 1.66E-05 | 0.002841 | 1k promote  |
| chr7  | 28121901  | 28122900  |          | Up | 0.65 | 2.45E-05 | 0.003775 | Intergenic  |
| chr5  | 155030801 | 155031800 |          | Up | 0.65 | 5.82E-05 | 0.006967 | Intergenic  |
| chr17 | 15887001  | 15888000  | Ythdc1   | Up | 0.65 | 5.53E-05 | 0.006733 | proximal pr |
| chr14 | 22834601  | 22835600  | Coro1a   | Up | 0.65 | 0.000222 | 0.021364 | proximal pr |
| chr5  | 74707201  | 74708200  | Ikbkap   | Up | 0.64 | 7.25E-06 | 0.001527 | 1k promote  |
| chr2  | 218894001 | 218895000 | Gclm     | Up | 0.64 | 2.43E-05 | 0.003754 | 1k promote  |
| chr2  | 211578001 | 211579200 |          | Up | 0.64 | 1.58E-06 | 0.000521 | Intergenic  |
| chr4  | 57600101  | 57601100  |          | Up | 0.64 | 5.59E-06 | 0.001253 | Intergenic  |
| chr6  | 40713001  | 40714000  |          | Up | 0.64 | 7.22E-05 | 0.008117 | Intergenic  |
| chr1  | 185857301 | 185858500 | RGD13591 | Up | 0.64 | 7.58E-05 | 0.008356 | proximal pr |
| chr4  | 160952701 | 160954000 | Cdca3    | Up | 0.63 | 6.82E-07 | 0.000303 | 1k promote  |
| chr10 | 91500701  | 91502000  | Rap2ip   | Up | 0.63 | 6.42E-05 | 0.007471 | 1k promote  |
| chr6  | 93029701  | 93030700  |          | Up | 0.63 | 5.26E-05 | 0.00648  | Intergenic  |
| chr4  | 43027601  | 43028700  |          | Up | 0.63 | 5.62E-05 | 0.006804 | Intergenic  |
| chr18 | 12383801  | 12384800  |          | Up | 0.63 | 6.95E-05 | 0.007899 | Intergenic  |
| chr5  | 51864701  | 51865700  | ST7      | Up | 0.63 | 0.00023  | 0.022197 | proximal pr |
| chr1  | 41891701  | 41892700  | Wtap     | Up | 0.62 | 4.32E-05 | 0.005664 | 1k promote  |
| chr8  | 49256901  | 49257900  | Zfp259   | Up | 0.62 | 7.82E-05 | 0.008529 | 1k promote  |
| chr3  | 116194701 | 116195900 | Cdkn2aip | Up | 0.62 | 2.31E-05 | 0.003615 | 3k promote  |
| chr14 | 83025301  | 83026300  | Gpr158   | Up | 0.62 | 0.000108 | 0.010789 | Genebody    |
| chr11 | 15974501  | 15975600  |          | Up | 0.62 | 5.15E-05 | 0.006379 | Intergenic  |
| chr8  | 114086501 | 114087600 | Atrip    | Up | 0.61 | 5.46E-05 | 0.006671 | 1k promote  |
| chr17 | 31910101  | 31911100  |          | Up | 0.61 | 7.41E-05 | 0.008249 | Intergenic  |
| chr2  | 218185201 | 218186200 |          | Up | 0.61 | 8.38E-05 | 0.008974 | Intergenic  |
| chr4  | 43357101  | 43358200  | Ppib     | Up | 0.61 | 8.98E-06 | 0.001808 | proximal pr |
| chr8  | 70342901  | 70343900  | Dak      | Up | 0.61 | 8.54E-05 | 0.009091 | proximal pr |
| chr5  | 25750601  | 25751600  | RGD15599 | Up | 0.6  | 2.53E-05 | 0.003841 | 1k promote  |
| chr18 | 16373201  | 16374200  | Slc39a6  | Up | 0.6  | 4.92E-05 | 0.006199 | 1k promote  |
| chr9  | 78973601  | 78974600  | Nrep     | Up | 0.6  | 4.83E-05 | 0.006121 | 3k promote  |

|       |           |           |          |    |      |          |          |             |
|-------|-----------|-----------|----------|----|------|----------|----------|-------------|
| chr3  | 77103301  | 77104800  |          | Up | 0.6  | 2.17E-05 | 0.003462 | Intergenic  |
| chr1  | 158040301 | 158041300 | Rab6a    | Up | 0.59 | 1.59E-05 | 0.002747 | 1k promote  |
| chr16 | 47747501  | 47748500  | Klhdc5   | Up | 0.59 | 2.68E-05 | 0.004002 | 3k promote  |
| chr9  | 57322701  | 57323900  | Odz2     | Up | 0.59 | 9.35E-05 | 0.009624 | Genebody    |
| chr6  | 41334501  | 41335500  |          | Up | 0.59 | 1.32E-11 | 4.48E-08 | Intergenic  |
| chr1  | 213094401 | 213096100 | Bora     | Up | 0.59 | 3.69E-05 | 0.005065 | proximal pr |
| chr15 | 82828701  | 82829700  | Slc25a26 | Up | 0.59 | 8.53E-05 | 0.009088 | proximal pr |
| chr6  | 26172701  | 26173700  | Hadha    | Up | 0.58 | 2.00E-09 | 2.00E-06 | 1k promote  |
| chr4  | 157237601 | 157238700 | Bcl2l13  | Up | 0.58 | 5.88E-06 | 0.001304 | 1k promote  |
| chr16 | 77047301  | 77048600  |          | Up | 0.58 | 3.75E-05 | 0.005112 | Intergenic  |
| chr4  | 128822001 | 128823100 | Atp6v1g1 | Up | 0.58 | 3.73E-06 | 0.000938 | proximal pr |
| chr1  | 227024901 | 227025900 | Ptar1    | Up | 0.57 | 1.21E-05 | 0.00224  | 1k promote  |
| chr8  | 75953301  | 75954400  | Polr2m   | Up | 0.57 | 3.18E-05 | 0.00452  | 1k promote  |
| chr17 | 48532501  | 48533800  | Cflar    | Up | 0.57 | 4.74E-05 | 0.006043 | Genebody    |
| chr20 | 5108101   | 5109800   | RGD13089 | Up | 0.57 | 6.56E-05 | 0.007591 | Genebody    |
| chr8  | 31035101  | 31036300  |          | Up | 0.57 | 5.87E-09 | 5.84E-06 | Intergenic  |
| chr3  | 57366301  | 57367300  |          | Up | 0.57 | 5.99E-07 | 0.000284 | Intergenic  |
| chr6  | 55010701  | 55011900  |          | Up | 0.57 | 1.29E-06 | 0.000456 | Intergenic  |
| chr6  | 103127101 | 103128300 |          | Up | 0.57 | 4.79E-05 | 0.006089 | Intergenic  |
| chr17 | 28579301  | 28580400  |          | Up | 0.57 | 0.000287 | 0.027473 | Intergenic  |
| chr5  | 80514901  | 80516400  | Prpf40a  | Up | 0.57 | 3.55E-05 | 0.004909 | proximal pr |
| chr1  | 163278901 | 163280100 | Smpd1    | Up | 0.56 | 1.86E-05 | 0.003077 | 1k promote  |
| chr18 | 81527801  | 81528800  | Timm21   | Up | 0.56 | 4.96E-05 | 0.006228 | 1k promote  |
| chr18 | 25870701  | 25871700  | Irs1     | Up | 0.56 | 5.22E-05 | 0.006451 | 3k promote  |
| chr10 | 21974601  | 21975600  | C2cd2    | Up | 0.56 | 8.16E-05 | 0.008815 | Genebody    |
| chr5  | 45471901  | 45472900  |          | Up | 0.56 | 3.52E-05 | 0.004882 | Intergenic  |
| chr4  | 184689501 | 184691100 | Pacsin3  | Up | 0.55 | 3.41E-07 | 0.00021  | 3k promote  |
| chr9  | 81639401  | 81640700  | Prpf38b  | Up | 0.55 | 2.92E-06 | 0.000784 | 3k promote  |
| chr2  | 180104401 | 180106200 | lqcf3    | Up | 0.55 | 2.92E-11 | 4.48E-08 | Genebody    |
| chr3  | 34720901  | 34721900  | Noa1     | Up | 0.55 | 1.36E-06 | 0.000471 | proximal pr |
| chr4  | 22694901  | 22696000  | Steap4   | Up | 0.54 | 2.58E-05 | 0.003884 | Genebody    |
| chr6  | 87973001  | 87974100  |          | Up | 0.54 | 1.50E-11 | 4.48E-08 | Intergenic  |
| chr1  | 193711501 | 193712600 |          | Up | 0.54 | 2.48E-06 | 0.000696 | Intergenic  |
| chr14 | 33107101  | 33108900  | Nkiras2  | Up | 0.54 | 1.50E-11 | 4.48E-08 | proximal pr |
| chr3  | 75608901  | 75610500  | Shh      | Up | 0.53 | 3.45E-06 | 0.000888 | 3k promote  |
| chr9  | 102622101 | 102623100 |          | Up | 0.53 | 6.10E-05 | 0.007191 | Intergenic  |
| chr1  | 217771001 | 217772000 | Tle4     | Up | 0.52 | 3.15E-05 | 0.004494 | 1k promote  |
| chr5  | 154702801 | 154703800 | Fuca1    | Up | 0.52 | 7.38E-05 | 0.008234 | 1k promote  |
| chr17 | 59576201  | 59577300  | B3galnt2 | Up | 0.52 | 9.34E-05 | 0.009624 | 1k promote  |
| chr5  | 22748601  | 22749600  |          | Up | 0.52 | 2.89E-05 | 0.004232 | Intergenic  |
| chr13 | 52301701  | 52302700  |          | Up | 0.52 | 6.96E-05 | 0.007904 | Intergenic  |
| chr10 | 89567001  | 89568000  | Tubgcp3  | Up | 0.52 | 1.36E-05 | 0.002437 | proximal pr |
| chr8  | 128248001 | 128249000 | Limd1    | Up | 0.51 | 1.34E-11 | 4.48E-08 | 1k promote  |
| chr2  | 204515901 | 204517300 | Cdc42se1 | Up | 0.51 | 9.73E-05 | 0.009873 | 3k promote  |
| chr6  | 110357501 | 110358500 | Hapln2   | Up | 0.51 | 1.88E-06 | 0.000578 | Genebody    |
| chr2  | 244880301 | 244881300 |          | Up | 0.51 | 2.37E-05 | 0.003684 | Intergenic  |
| chr8  | 113831201 | 113832200 |          | Up | 0.51 | 4.42E-05 | 0.005761 | Intergenic  |
| chr3  | 25454001  | 25455000  | Gtdc1    | Up | 0.5  | 8.44E-05 | 0.009024 | 1k promote  |

|       |           |           |           |    |      |          |          |             |
|-------|-----------|-----------|-----------|----|------|----------|----------|-------------|
| chr11 | 37930401  | 37931400  | Hist1h2an | Up | 0.5  | 1.74E-11 | 4.48E-08 | Genebody    |
| chr8  | 111692001 | 111693000 | Tapbp     | Up | 0.5  | 7.58E-05 | 0.008356 | Genebody    |
| chr7  | 135154501 | 135155500 |           | Up | 0.5  | 6.91E-05 | 0.007873 | Intergenic  |
| chr9  | 57161001  | 57162400  |           | Up | 0.5  | 8.33E-05 | 0.008947 | Intergenic  |
| chr8  | 107665501 | 107666700 |           | Up | 0.5  | 0.000112 | 0.011163 | Intergenic  |
| chr16 | 81708401  | 81709400  | RGD15611  | Up | 0.5  | 2.34E-11 | 4.48E-08 | proximal pr |
| chr7  | 25402701  | 25404000  | Enpp1     | Up | 0.5  | 0.00016  | 0.015678 | proximal pr |
| chr2  | 23470401  | 23471400  | Papd4     | Up | 0.49 | 4.71E-05 | 0.006021 | 1k promote  |
| chr14 | 19390401  | 19391400  | Cox18     | Up | 0.49 | 5.29E-05 | 0.006507 | 1k promote  |
| chr12 | 14691701  | 14693100  | Eif3b     | Up | 0.49 | 0.000211 | 0.020367 | 1k promote  |
| chr6  | 93230701  | 93231900  |           | Up | 0.49 | 2.40E-11 | 4.48E-08 | Intergenic  |
| chr3  | 13768401  | 13769400  |           | Up | 0.49 | 1.41E-05 | 0.002492 | Intergenic  |
| chr8  | 60827901  | 60829100  |           | Up | 0.49 | 1.55E-05 | 0.002702 | Intergenic  |
| chr1  | 21223201  | 21224300  | Rpl5      | Up | 0.49 | 0.000156 | 0.015314 | proximal pr |
| chr16 | 49916401  | 49917400  | Sorbs2    | Up | 0.48 | 1.41E-11 | 4.48E-08 | 1k promote  |
| chr1  | 42053201  | 42054200  |           | Up | 0.48 | 1.36E-11 | 4.48E-08 | Intergenic  |
| chr6  | 79821001  | 79822100  |           | Up | 0.48 | 2.06E-11 | 4.48E-08 | Intergenic  |
| chr15 | 81688101  | 81689100  |           | Up | 0.48 | 1.69E-09 | 1.69E-06 | Intergenic  |
| chr8  | 125271301 | 125272300 |           | Up | 0.48 | 7.28E-06 | 0.001532 | Intergenic  |
| chr14 | 2403301   | 2405000   | Vps13b    | Up | 0.48 | 1.11E-06 | 0.000413 | proximal pr |
| chr7  | 70839101  | 70840100  | Fzd4      | Up | 0.48 | 1.13E-05 | 0.002138 | proximal pr |
| chr1  | 145953301 | 145954500 | Zfp438    | Up | 0.48 | 6.37E-05 | 0.007436 | proximal pr |
| chr6  | 41309401  | 41310400  | Odc1      | Up | 0.47 | 2.96E-11 | 4.48E-08 | 1k promote  |
| chr2  | 189417801 | 189418800 | mrpl9     | Up | 0.47 | 7.64E-05 | 0.008399 | 1k promote  |
| chr4  | 2202701   | 2203800   | Luc7l2    | Up | 0.47 | 3.55E-06 | 0.000905 | 3k promote  |
| chr11 | 80846501  | 80847700  | Etv5      | Up | 0.46 | 9.27E-06 | 0.001855 | 1k promote  |
| chr6  | 79707001  | 79708300  | Sec23a    | Up | 0.46 | 3.94E-05 | 0.005294 | 1k promote  |
| chr17 | 92866501  | 92867700  |           | Up | 0.46 | 9.38E-06 | 0.001871 | Intergenic  |
| chr4  | 80469801  | 80471000  |           | Up | 0.46 | 9.31E-05 | 0.009611 | Intergenic  |
| chr1  | 226419701 | 226421100 | Klf9      | Up | 0.45 | 1.50E-06 | 0.000507 | 1k promote  |
| chr2  | 190139601 | 190140600 | Bach1     | Up | 0.45 | 0.000109 | 0.010847 | 3k promote  |
| chr15 | 27446501  | 27448000  |           | Up | 0.45 | 4.40E-07 | 0.000239 | Intergenic  |
| chr4  | 120590201 | 120591200 | Tia1      | Up | 0.44 | 2.46E-11 | 4.48E-08 | 1k promote  |
| chr4  | 55793801  | 55794800  |           | Up | 0.44 | 7.74E-05 | 0.00848  | Intergenic  |
| chr8  | 20470501  | 20472200  |           | Up | 0.44 | 8.38E-05 | 0.008974 | Intergenic  |
| chr5  | 36631301  | 36632600  |           | Up | 0.44 | 0.000103 | 0.010321 | Intergenic  |
| chr17 | 60669501  | 60670600  | Sp8       | Up | 0.44 | 0.00011  | 0.010945 | proximal pr |
| chr3  | 30420201  | 30422100  | Epc2      | Up | 0.43 | 0.000331 | 0.031444 | 1k promote  |
| chr4  | 81032001  | 81033200  | Coq6      | Up | 0.43 | 2.93E-11 | 4.48E-08 | Genebody    |
| chr16 | 46807401  | 46808600  | Dnajb9    | Up | 0.43 | 1.61E-05 | 0.002772 | Genebody    |
| chr8  | 82884301  | 82885300  |           | Up | 0.43 | 1.70E-08 | 1.65E-05 | Intergenic  |
| chr6  | 91194001  | 91195000  | Klhdc1    | Up | 0.42 | 2.79E-11 | 4.48E-08 | 1k promote  |
| chr12 | 35141701  | 35142700  | Ift81     | Up | 0.42 | 2.61E-05 | 0.003923 | 1k promote  |
| chr5  | 49605601  | 49606600  | Rngtt     | Up | 0.42 | 3.28E-05 | 0.004639 | 1k promote  |
| chr6  | 108434901 | 108435900 | Odz3      | Up | 0.42 | 9.33E-05 | 0.009619 | Genebody    |
| chr6  | 8858001   | 8859000   |           | Up | 0.42 | 4.80E-06 | 0.001123 | Intergenic  |
| chr5  | 130156001 | 130157000 | Kti12     | Up | 0.41 | 2.82E-11 | 4.48E-08 | 1k promote  |
| chr6  | 146168501 | 146169600 | Phospho2  | Up | 0.41 | 1.09E-08 | 1.07E-05 | proximal pr |

|       |           |           |         |    |      |          |          |             |
|-------|-----------|-----------|---------|----|------|----------|----------|-------------|
| chr3  | 51937301  | 51938500  | Rbp4    | Up | 0.41 | 0.000106 | 0.010613 | proximal pr |
| chr3  | 67937701  | 67938900  | Clp1    | Up | 0.4  | 4.87E-11 | 6.25E-08 | 1k promote  |
| chr6  | 92100401  | 92101600  | Sav1    | Up | 0.4  | 5.17E-11 | 6.25E-08 | 1k promote  |
| chr4  | 120837401 | 120838500 | Snrnp27 | Up | 0.4  | 5.23E-08 | 5.02E-05 | 1k promote  |
| chr4  | 173818601 | 173820700 | H2afj   | Up | 0.4  | 6.82E-06 | 0.00146  | 1k promote  |
| chr4  | 66121901  | 66123200  | Pmp22   | Up | 0.4  | 1.88E-11 | 4.48E-08 | 3k promote  |
| chr6  | 63583701  | 63584700  | Commd10 | Up | 0.4  | 2.08E-07 | 0.000157 | Genebody    |
| chr13 | 68507101  | 68508100  | Dhx9    | Up | 0.39 | 2.04E-11 | 4.48E-08 | 1k promote  |
| chr17 | 95140301  | 95141700  | Prtfcd1 | Up | 0.39 | 2.68E-06 | 0.000734 | 1k promote  |
| chr4  | 1408801   | 1410000   | Rnf32   | Up | 0.39 | 9.51E-05 | 0.009732 | 1k promote  |
| chr18 | 41358001  | 41359000  | Sfrp2   | Up | 0.39 | 2.39E-11 | 4.48E-08 | Genebody    |
| chr20 | 14098901  | 14099900  |         | Up | 0.39 | 1.34E-11 | 4.48E-08 | Intergenic  |
| chr17 | 12452701  | 12453700  |         | Up | 0.38 | 2.36E-11 | 4.48E-08 | Intergenic  |
| chr7  | 32843401  | 32844400  |         | Up | 0.38 | 1.30E-11 | 4.48E-08 | Intergenic  |
| chr13 | 98543401  | 98544800  |         | Up | 0.38 | 4.72E-11 | 6.16E-08 | Intergenic  |
| chr2  | 123860301 | 123861300 |         | Up | 0.38 | 4.69E-11 | 6.16E-08 | Intergenic  |
| chr3  | 18847201  | 18848200  | Smc3    | Up | 0.37 | 2.51E-11 | 4.48E-08 | 1k promote  |
| chr1  | 259822701 | 259823700 | Golga1  | Up | 0.37 | 2.14E-11 | 4.48E-08 | 1k promote  |
| chr18 | 14717801  | 14718800  | Nol4    | Up | 0.37 | 3.84E-11 | 5.35E-08 | 1k promote  |
| chr11 | 27467901  | 27469100  | Ezh2    | Up | 0.37 | 6.43E-05 | 0.007481 | 3k promote  |
| chr14 | 34027901  | 34028900  |         | Up | 0.37 | 1.10E-11 | 4.48E-08 | Intergenic  |
| chr20 | 41362001  | 41363000  |         | Up | 0.37 | 4.56E-11 | 6.12E-08 | Intergenic  |
| chr2  | 23582201  | 23583400  |         | Up | 0.37 | 0.000411 | 0.038946 | Intergenic  |
| chr1  | 242450401 | 242451700 | Rfxap   | Up | 0.37 | 7.22E-09 | 7.09E-06 | proximal pr |
| chr14 | 84555901  | 84556900  | Dusp18  | Up | 0.36 | 2.31E-11 | 4.48E-08 | 1k promote  |
| chr10 | 85034101  | 85035100  | Hoxb5   | Up | 0.36 | 4.29E-05 | 0.005634 | 1k promote  |
| chr8  | 124303501 | 124304800 | Myd88   | Up | 0.36 | 0.000273 | 0.026202 | 1k promote  |
| chr10 | 49308101  | 49309100  | Ywhae   | Up | 0.36 | 2.23E-11 | 4.48E-08 | 3k promote  |
| chr2  | 175484901 | 175485900 | Synj2   | Up | 0.36 | 7.27E-11 | 8.33E-08 | Genebody    |
| chr13 | 49624801  | 49626200  |         | Up | 0.36 | 2.68E-11 | 4.48E-08 | Intergenic  |
| chr7  | 59468201  | 59469400  | Irak3   | Up | 0.35 | 0.000385 | 0.036552 | 1k promote  |
| chr15 | 83449901  | 83451000  |         | Up | 0.35 | 1.36E-11 | 4.48E-08 | Intergenic  |
| chr20 | 35021401  | 35022400  |         | Up | 0.35 | 1.44E-11 | 4.48E-08 | Intergenic  |
| chr8  | 82882801  | 82883800  |         | Up | 0.35 | 2.87E-11 | 4.48E-08 | Intergenic  |
| chr3  | 115688401 | 115689500 |         | Up | 0.35 | 0.00018  | 0.017468 | Intergenic  |
| chr2  | 144040401 | 144041400 | Acbd5   | Up | 0.35 | 6.85E-05 | 0.007816 | proximal pr |
| chr4  | 75771601  | 75772600  | Pcgf6   | Up | 0.34 | 1.15E-11 | 4.48E-08 | 3k promote  |
| chr2  | 113127101 | 113128200 | Rhobtb1 | Up | 0.34 | 1.18E-11 | 4.48E-08 | Genebody    |
| chr4  | 7154901   | 7155900   |         | Up | 0.34 | 1.97E-11 | 4.48E-08 | Intergenic  |
| chr20 | 48976001  | 48977000  |         | Up | 0.34 | 4.64E-05 | 0.005949 | Intergenic  |
| chr17 | 96676801  | 96677900  | Tial1   | Up | 0.34 | 1.13E-11 | 4.48E-08 | proximal pr |
| chr10 | 37523901  | 37524900  | Ube2b   | Up | 0.33 | 1.45E-11 | 4.48E-08 | 1k promote  |
| chr3  | 89815601  | 89816600  | Hipk3   | Up | 0.33 | 1.71E-11 | 4.48E-08 | 1k promote  |
| chr10 | 63073201  | 63074300  | Atp6v1h | Up | 0.33 | 5.17E-11 | 6.25E-08 | 3k promote  |
| chr1  | 40785401  | 40786400  | Fam172a | Up | 0.33 | 1.53E-10 | 1.57E-07 | Genebody    |
| chr16 | 2367501   | 2368500   |         | Up | 0.33 | 2.37E-11 | 4.48E-08 | Intergenic  |
| chr2  | 213164301 | 213165500 |         | Up | 0.33 | 1.26E-08 | 1.23E-05 | Intergenic  |
| chr14 | 103674701 | 103676500 | Cct4    | Up | 0.32 | 0.000257 | 0.024711 | 1k promote  |

|       |           |           |          |    |      |          |          |             |
|-------|-----------|-----------|----------|----|------|----------|----------|-------------|
| chr2  | 212824801 | 212825900 | Ccdc76   | Up | 0.32 | 0.000275 | 0.026315 | 1k promote  |
| chr1  | 252378401 | 252379400 | Brd1     | Up | 0.32 | 2.09E-11 | 4.48E-08 | 3k promote  |
| chr5  | 14681901  | 14682900  | Ube2j1   | Up | 0.32 | 1.03E-05 | 0.00201  | 3k promote  |
| chr7  | 127033801 | 127034800 | Nfil3    | Up | 0.32 | 1.93E-05 | 0.003151 | 3k promote  |
| chr5  | 49315601  | 49316600  | Scml4    | Up | 0.32 | 0.000102 | 0.010207 | 3k promote  |
| chr2  | 5738701   | 5740500   | Foxp1    | Up | 0.32 | 2.38E-11 | 4.48E-08 | Genebody    |
| chr1  | 18222701  | 18223700  |          | Up | 0.32 | 1.12E-11 | 4.48E-08 | Intergenic  |
| chr15 | 4435501   | 4436500   |          | Up | 0.32 | 1.99E-11 | 4.48E-08 | Intergenic  |
| chr4  | 39133701  | 39134700  |          | Up | 0.32 | 1.50E-11 | 4.48E-08 | Intergenic  |
| chr4  | 182921701 | 182922700 |          | Up | 0.32 | 4.59E-11 | 6.12E-08 | Intergenic  |
| chr11 | 64826001  | 64827000  |          | Up | 0.32 | 5.98E-05 | 0.007102 | Intergenic  |
| chr5  | 148157201 | 148158200 | Ak2      | Up | 0.31 | 4.15E-11 | 5.69E-08 | 1k promote  |
| chr17 | 18094401  | 18095900  | Zmym4    | Up | 0.31 | 2.37E-11 | 4.48E-08 | 3k promote  |
| chr20 | 46772101  | 46773600  | Plekhh3  | Up | 0.31 | 6.75E-09 | 6.69E-06 | 3k promote  |
| chr14 | 64194601  | 64195600  |          | Up | 0.31 | 1.30E-11 | 4.48E-08 | Intergenic  |
| chr4  | 80093801  | 80094800  |          | Up | 0.31 | 1.67E-11 | 4.48E-08 | Intergenic  |
| chr11 | 79961701  | 79962700  |          | Up | 0.31 | 5.16E-11 | 6.25E-08 | Intergenic  |
| chr8  | 113564901 | 113565900 | Ppp1r10  | Up | 0.3  | 2.46E-11 | 4.48E-08 | 1k promote  |
| chr20 | 2983801   | 2984800   | RGD13110 | Up | 0.3  | 1.15E-11 | 4.48E-08 | 1k promote  |
| chr5  | 146383801 | 146384800 | Chmp5    | Up | 0.3  | 1.20E-11 | 4.48E-08 | 3k promote  |
| chr10 | 90190101  | 90191100  | Golph3   | Up | 0.3  | 9.62E-06 | 0.001913 | 3k promote  |
| chr5  | 144627401 | 144628400 |          | Up | 0.3  | 4.70E-05 | 0.006015 | Intergenic  |
| chr1  | 187705401 | 187706400 | Deadc1   | Up | 0.3  | 2.15E-11 | 4.48E-08 | proximal pr |
| chr5  | 58080501  | 58081500  | Aptx     | Up | 0.3  | 3.92E-11 | 5.43E-08 | proximal pr |
| chr2  | 128732201 | 128733200 | Sc1t1    | Up | 0.3  | 2.62E-05 | 0.00393  | proximal pr |
| chr7  | 56565001  | 56566000  | Rpl17    | Up | 0.29 | 1.87E-11 | 4.48E-08 | 1k promote  |
| chr18 | 71863301  | 71864300  | Yeats4   | Up | 0.29 | 1.45E-11 | 4.48E-08 | 1k promote  |
| chr5  | 58343401  | 58344400  | Smcp     | Up | 0.29 | 1.33E-11 | 4.48E-08 | 3k promote  |
| chr2  | 61789901  | 61790900  | Impad1   | Up | 0.29 | 6.05E-05 | 0.007148 | 3k promote  |
| chr20 | 54907801  | 54908800  | Sim1     | Up | 0.29 | 1.88E-11 | 4.48E-08 | proximal pr |
| chr9  | 61831301  | 61833400  | Eef1b2   | Up | 0.29 | 7.38E-11 | 8.43E-08 | proximal pr |
| chr17 | 30017801  | 30018800  | Ubxn4    | Up | 0.28 | 1.79E-11 | 4.48E-08 | 1k promote  |
| chr13 | 40947301  | 40948300  | Tfap2a   | Up | 0.28 | 1.12E-11 | 4.48E-08 | 1k promote  |
| chr20 | 20120701  | 20121700  | Rab2a    | Up | 0.28 | 1.62E-11 | 4.48E-08 | Genebody    |
| chr1  | 232609301 | 232610400 |          | Up | 0.28 | 2.69E-11 | 4.48E-08 | Intergenic  |
| chr19 | 17091901  | 17093100  | Rbl2     | Up | 0.28 | 2.22E-11 | 4.48E-08 | proximal pr |
| chr6  | 101902001 | 101903300 | Arg2     | Up | 0.27 | 2.48E-11 | 4.48E-08 | 1k promote  |
| chr2  | 185576001 | 185577000 | Ube2d3   | Up | 0.27 | 5.01E-11 | 6.25E-08 | 3k promote  |
| chr20 | 47658801  | 47659800  |          | Up | 0.27 | 1.30E-11 | 4.48E-08 | Intergenic  |
| chr3  | 56999801  | 57000800  |          | Up | 0.27 | 4.90E-11 | 6.25E-08 | Intergenic  |
| chr14 | 45412001  | 45413000  | Ube2k    | Up | 0.26 | 1.21E-11 | 4.48E-08 | 1k promote  |
| chr6  | 123762601 | 123763600 | Whsc2    | Up | 0.26 | 1.84E-11 | 4.48E-08 | 1k promote  |
| chr18 | 64271501  | 64272500  | Ptpn2    | Up | 0.26 | 1.72E-11 | 4.48E-08 | 1k promote  |
| chr14 | 82502001  | 82503000  | Foxn3    | Up | 0.26 | 1.43E-11 | 4.48E-08 | 1k promote  |
| chr11 | 81259701  | 81260800  | Senp2    | Up | 0.26 | 0.000112 | 0.011109 | 1k promote  |
| chr5  | 18107401  | 18108400  | Ebag9    | Up | 0.26 | 2.92E-11 | 4.48E-08 | 3k promote  |
| chr2  | 232944101 | 232945500 | Mfsd9    | Up | 0.26 | 1.69E-11 | 4.48E-08 | 3k promote  |
| chr4  | 133869801 | 133870800 | P2ry2    | Up | 0.26 | 7.23E-05 | 0.008125 | Genebody    |

|       |           |           |           |    |      |          |          |             |
|-------|-----------|-----------|-----------|----|------|----------|----------|-------------|
| chr15 | 85562001  | 85563000  |           | Up | 0.26 | 1.74E-11 | 4.48E-08 | Intergenic  |
| chr2  | 21634201  | 21635200  |           | Up | 0.26 | 1.43E-11 | 4.48E-08 | Intergenic  |
| chr2  | 35456001  | 35457100  |           | Up | 0.26 | 4.13E-11 | 5.69E-08 | Intergenic  |
| chr3  | 3238501   | 3239500   | Arrdc1    | Up | 0.26 | 5.44E-11 | 6.39E-08 | proximal pr |
| chr10 | 76339401  | 76340400  | Srsf1     | Up | 0.25 | 1.62E-11 | 4.48E-08 | 1k promote  |
| chr6  | 124094301 | 124095700 | Efcab11   | Up | 0.25 | 5.80E-11 | 6.74E-08 | 1k promote  |
| chr7  | 80515901  | 80516900  | Nkx6-2    | Up | 0.25 | 3.12E-11 | 4.57E-08 | 3k promote  |
| chr5  | 22396101  | 22397100  | G2e3      | Up | 0.25 | 1.15E-11 | 4.48E-08 | Genebody    |
| chr14 | 44785501  | 44786500  |           | Up | 0.25 | 1.55E-11 | 4.48E-08 | Intergenic  |
| chr16 | 69559501  | 69560500  |           | Up | 0.25 | 1.18E-11 | 4.48E-08 | Intergenic  |
| chr5  | 156161001 | 156162000 |           | Up | 0.25 | 1.40E-11 | 4.48E-08 | Intergenic  |
| chr6  | 93402701  | 93403700  |           | Up | 0.25 | 2.65E-11 | 4.48E-08 | Intergenic  |
| chr10 | 46128401  | 46129400  | Ttll13    | Up | 0.24 | 2.10E-11 | 4.48E-08 | 1k promote  |
| chr14 | 45477301  | 45478300  | Fln       | Up | 0.24 | 1.23E-11 | 4.48E-08 | 1k promote  |
| chr1  | 136058901 | 136059900 | RGD13111  | Up | 0.24 | 1.46E-11 | 4.48E-08 | 1k promote  |
| chr7  | 61631801  | 61632800  | Srgap1    | Up | 0.24 | 4.86E-05 | 0.006151 | 1k promote  |
| chr9  | 39937801  | 39938800  | Dusp10    | Up | 0.24 | 2.18E-11 | 4.48E-08 | 3k promote  |
| chr2  | 105145001 | 105146100 | Aak1      | Up | 0.24 | 2.28E-11 | 4.48E-08 | Genebody    |
| chr1  | 158450501 | 158451500 | Cyp4f5    | Up | 0.24 | 1.14E-11 | 4.48E-08 | Genebody    |
| chr1  | 52337801  | 52338800  |           | Up | 0.24 | 2.62E-11 | 4.48E-08 | Intergenic  |
| chr15 | 57762301  | 57763400  |           | Up | 0.24 | 3.09E-05 | 0.004427 | Intergenic  |
| chr17 | 51038101  | 51039100  |           | Up | 0.24 | 7.82E-05 | 0.008529 | Intergenic  |
| chr2  | 159026801 | 159027800 | Trim59    | Up | 0.24 | 1.44E-05 | 0.002542 | proximal pr |
| chr17 | 40280201  | 40281200  | Dusp22    | Up | 0.23 | 1.13E-11 | 4.48E-08 | 1k promote  |
| chr17 | 62769501  | 62770500  | Crem      | Up | 0.23 | 1.17E-11 | 4.48E-08 | 1k promote  |
| chr3  | 78417101  | 78418100  | Alkbh3    | Up | 0.23 | 1.19E-11 | 4.48E-08 | 1k promote  |
| chr8  | 58433301  | 58434300  | Ireb2     | Up | 0.23 | 5.25E-05 | 0.006476 | 1k promote  |
| chr1  | 199400701 | 199401700 | Usp25     | Up | 0.23 | 5.29E-11 | 6.30E-08 | 3k promote  |
| chr13 | 100020801 | 100021800 | Fkbp7     | Up | 0.23 | 2.71E-05 | 0.004037 | 3k promote  |
| chr1  | 45167901  | 45169000  |           | Up | 0.23 | 2.80E-11 | 4.48E-08 | Intergenic  |
| chr2  | 190605701 | 190606700 |           | Up | 0.23 | 1.10E-11 | 4.48E-08 | Intergenic  |
| chr4  | 162221901 | 162222900 |           | Up | 0.23 | 2.73E-05 | 0.004052 | Intergenic  |
| chr2  | 189416701 | 189417700 | mrpl9     | Up | 0.23 | 1.35E-11 | 4.48E-08 | proximal pr |
| chr19 | 17033801  | 17034800  | Fan1      | Up | 0.22 | 2.64E-11 | 4.48E-08 | 1k promote  |
| chr10 | 75345401  | 75346400  | Gdpd1     | Up | 0.22 | 2.51E-11 | 4.48E-08 | 1k promote  |
| chr1  | 118811801 | 118812800 | Aktip     | Up | 0.22 | 1.32E-11 | 4.48E-08 | 1k promote  |
| chr10 | 106193501 | 106194500 | Wbp2      | Up | 0.22 | 2.31E-05 | 0.003613 | 1k promote  |
| chr11 | 15801701  | 15802700  | Wee1      | Up | 0.22 | 1.17E-11 | 4.48E-08 | 3k promote  |
| chr3  | 59373901  | 59374900  | LOC100197 | Up | 0.22 | 2.36E-11 | 4.48E-08 | 3k promote  |
| chr1  | 167770501 | 167771500 | Ccr10     | Up | 0.22 | 2.25E-10 | 2.28E-07 | 3k promote  |
| chr2  | 121178401 | 121179400 |           | Up | 0.22 | 1.35E-11 | 4.48E-08 | Intergenic  |
| chr4  | 125163001 | 125164100 |           | Up | 0.22 | 2.96E-11 | 4.48E-08 | Intergenic  |
| chr9  | 21852701  | 21853700  |           | Up | 0.22 | 1.21E-11 | 4.48E-08 | Intergenic  |
| chr15 | 27043701  | 27046200  |           | Up | 0.22 | 1.06E-10 | 1.11E-07 | Intergenic  |
| chr3  | 63493601  | 63494600  | Nup35     | Up | 0.22 | 9.83E-11 | 1.04E-07 | proximal pr |
| chr3  | 67886901  | 67887900  | LOC498356 | Up | 0.21 | 2.30E-11 | 4.48E-08 | 1k promote  |
| chr3  | 153794401 | 153795400 | Tmx2      | Up | 0.21 | 1.10E-11 | 4.48E-08 | 1k promote  |
| chr14 | 33445001  | 33446000  | Srsf6     | Up | 0.21 | 1.99E-11 | 4.48E-08 | 1k promote  |



|       |           |           |           |    |      |          |          |             |
|-------|-----------|-----------|-----------|----|------|----------|----------|-------------|
| chr2  | 88340501  | 88341500  | RGD15656  | Up | 0.21 | 3.63E-11 | 5.12E-08 | 1k promote  |
| chr7  | 51875801  | 51876800  | Dapk1     | Up | 0.21 | 2.63E-11 | 4.48E-08 | 3k promote  |
| chr6  | 71426401  | 71427400  | Mtss1     | Up | 0.21 | 2.64E-11 | 4.48E-08 | Genebody    |
| chr3  | 148944701 | 148945700 |           | Up | 0.21 | 1.09E-11 | 4.48E-08 | Intergenic  |
| chr8  | 22659201  | 22660200  |           | Up | 0.21 | 1.11E-11 | 4.48E-08 | Intergenic  |
| chr2  | 155461101 | 155462700 | Lekr1     | Up | 0.21 | 7.97E-11 | 8.70E-08 | proximal pr |
| chr2  | 180380701 | 180381700 | Cct3      | Up | 0.21 | 6.05E-05 | 0.007148 | proximal pr |
| chr9  | 42985201  | 42986200  | Tpp2      | Up | 0.2  | 1.27E-11 | 4.48E-08 | 1k promote  |
| chr10 | 90192701  | 90194200  | Zfp706    | Up | 0.2  | 3.13E-11 | 4.57E-08 | 3k promote  |
| chr14 | 89571501  | 89572500  |           | Up | 0.2  | 2.16E-11 | 4.48E-08 | Intergenic  |
| chr15 | 27448101  | 27449100  |           | Up | 0.2  | 2.83E-11 | 4.48E-08 | Intergenic  |
| chr6  | 91323601  | 91325000  |           | Up | 0.2  | 2.10E-10 | 2.13E-07 | Intergenic  |
| chr5  | 79152101  | 79153100  | Zfp37     | Up | 0.19 | 1.17E-11 | 4.48E-08 | 1k promote  |
| chr17 | 9777501   | 9778500   | Vps13a    | Up | 0.19 | 1.11E-11 | 4.48E-08 | 3k promote  |
| chr7  | 72516101  | 72517100  | Klhl9     | Up | 0.19 | 1.23E-11 | 4.48E-08 | 3k promote  |
| chr19 | 56289601  | 56290600  |           | Up | 0.19 | 1.13E-11 | 4.48E-08 | Intergenic  |
| chr2  | 86032501  | 86033500  |           | Up | 0.19 | 1.11E-11 | 4.48E-08 | Intergenic  |
| chr6  | 109571901 | 109572900 |           | Up | 0.19 | 2.11E-11 | 4.48E-08 | Intergenic  |
| chr2  | 118554701 | 118555700 |           | Up | 0.19 | 3.00E-11 | 4.51E-08 | Intergenic  |
| chr7  | 9421601   | 9422600   |           | Up | 0.19 | 6.85E-05 | 0.007816 | Intergenic  |
| chr1  | 211485401 | 211486400 | Ttc9c     | Up | 0.18 | 1.12E-11 | 4.48E-08 | 1k promote  |
| chr9  | 4872601   | 4873600   | Plcl2     | Up | 0.18 | 2.57E-11 | 4.48E-08 | 1k promote  |
| chr19 | 53741801  | 53742900  | Tubb3     | Up | 0.18 | 0.00029  | 0.027725 | 1k promote  |
| chr1  | 220219801 | 220220800 | Dnajb2    | Up | 0.18 | 1.10E-11 | 4.48E-08 | 3k promote  |
| chr5  | 108198501 | 108199500 | Tmem30a   | Up | 0.18 | 5.02E-11 | 6.25E-08 | 3k promote  |
| chr4  | 121138301 | 121139300 | Ctnnal1   | Up | 0.18 | 2.63E-11 | 4.48E-08 | Genebody    |
| chr7  | 13133001  | 13134000  | Tcf7l2    | Up | 0.18 | 4.21E-05 | 0.005568 | Genebody    |
| chr3  | 103020701 | 103021700 |           | Up | 0.18 | 1.10E-11 | 4.48E-08 | Intergenic  |
| chr7  | 121216501 | 121217500 |           | Up | 0.18 | 2.95E-11 | 4.48E-08 | Intergenic  |
| chr9  | 74929101  | 74930100  |           | Up | 0.18 | 1.10E-11 | 4.48E-08 | Intergenic  |
| chr9  | 91727501  | 91728500  |           | Up | 0.18 | 2.74E-11 | 4.48E-08 | Intergenic  |
| chr18 | 61093401  | 61094500  |           | Up | 0.18 | 4.58E-11 | 6.12E-08 | Intergenic  |
| chr10 | 57938401  | 57939400  | LOC69199! | Up | 0.18 | 2.73E-11 | 4.48E-08 | proximal pr |
| chr11 | 79004901  | 79005900  | Bcl6      | Up | 0.17 | 2.34E-11 | 4.48E-08 | 1k promote  |
| chr7  | 30896801  | 30898500  | Usp44     | Up | 0.17 | 1.26E-10 | 1.32E-07 | 1k promote  |
| chr14 | 7222101   | 7223100   | LOC49833( | Up | 0.17 | 9.51E-05 | 0.009732 | 1k promote  |
| chr9  | 74516101  | 74517100  | Scd       | Up | 0.17 | 2.45E-11 | 4.48E-08 | 3k promote  |
| chr8  | 84850601  | 84851600  | Zfp217    | Up | 0.17 | 1.09E-11 | 4.48E-08 | 3k promote  |
| chr1  | 51584401  | 51585400  |           | Up | 0.17 | 2.72E-11 | 4.48E-08 | Intergenic  |
| chr18 | 6348001   | 6349000   |           | Up | 0.17 | 2.81E-11 | 4.48E-08 | Intergenic  |
| chr17 | 67084001  | 67085000  |           | Up | 0.17 | 4.88E-11 | 6.25E-08 | Intergenic  |
| chr17 | 11957801  | 11958800  |           | Up | 0.17 | 7.39E-05 | 0.008238 | Intergenic  |
| chr4  | 49540101  | 49541100  | Aass      | Up | 0.16 | 1.11E-11 | 4.48E-08 | 1k promote  |
| chr7  | 54947101  | 54948100  |           | Up | 0.16 | 1.11E-11 | 4.48E-08 | Intergenic  |
| chr17 | 79987801  | 79988800  |           | Up | 0.16 | 8.97E-11 | 9.66E-08 | Intergenic  |
| chr7  | 96096601  | 96097600  | Sqle      | Up | 0.16 | 2.20E-11 | 4.48E-08 | proximal pr |
| chr9  | 73950301  | 73951300  | Rnf25     | Up | 0.16 | 3.11E-11 | 4.57E-08 | proximal pr |
| chr4  | 5333501   | 5334500   | Galnt15   | Up | 0.16 | 3.74E-11 | 5.24E-08 | proximal pr |

|       |           |           |          |      |       |          |          |             |
|-------|-----------|-----------|----------|------|-------|----------|----------|-------------|
| chr6  | 51753601  | 51754600  |          | Up   | 0.15  | 3.09E-11 | 4.57E-08 | Intergenic  |
| chr1  | 114083001 | 114084000 |          | Up   | 0.15  | 4.65E-11 | 6.16E-08 | Intergenic  |
| chr1  | 52270901  | 52271900  |          | Up   | 0.15  | 7.87E-11 | 8.67E-08 | Intergenic  |
| chr1  | 249358801 | 249359900 | Msc      | Up   | 0.14  | 2.66E-11 | 4.48E-08 | 3k promote  |
| chr3  | 161157901 | 161158900 | Sass6    | Up   | 0.14  | 5.28E-11 | 6.30E-08 | 3k promote  |
| chr10 | 13402201  | 13403200  |          | Up   | 0.14  | 2.13E-11 | 4.48E-08 | Intergenic  |
| chr15 | 60783901  | 60784900  |          | Up   | 0.14  | 2.18E-11 | 4.48E-08 | Intergenic  |
| chr14 | 7567201   | 7568200   |          | Up   | 0.14  | 3.17E-11 | 4.60E-08 | Intergenic  |
| chr7  | 25084501  | 25085500  |          | Up   | 0.14  | 7.60E-11 | 8.54E-08 | Intergenic  |
| chr20 | 23466301  | 23467300  |          | Up   | 0.14  | 9.04E-11 | 9.69E-08 | Intergenic  |
| chr8  | 109399801 | 109400800 | Acpp     | Up   | 0.14  | 3.48E-11 | 4.94E-08 | proximal pr |
| chr15 | 32965101  | 32966100  | Homez    | Up   | 0.13  | 2.36E-11 | 4.48E-08 | 1k promote  |
| chr7  | 95863501  | 95864500  | Cyp4f1   | Up   | 0.13  | 1.34E-10 | 1.38E-07 | Genebody    |
| chr12 | 31632201  | 31633200  |          | Up   | 0.13  | 2.95E-11 | 4.48E-08 | Intergenic  |
| chr14 | 46232101  | 46233100  |          | Up   | 0.13  | 2.41E-11 | 4.48E-08 | Intergenic  |
| chr3  | 128235501 | 128236500 |          | Up   | 0.13  | 5.08E-11 | 6.25E-08 | Intergenic  |
| chr10 | 108945701 | 108947200 |          | Up   | 0.13  | 7.82E-11 | 8.67E-08 | Intergenic  |
| chr10 | 92551401  | 92552400  | Arhgap27 | Up   | 0.12  | 2.81E-11 | 4.48E-08 | 1k promote  |
| chr1  | 149467501 | 149468500 | Ankrd42  | Up   | 0.12  | 3.42E-11 | 4.87E-08 | 1k promote  |
| chr7  | 94596201  | 94597200  | Derl1    | Up   | 0.12  | 4.72E-11 | 6.16E-08 | 1k promote  |
| chr5  | 3700101   | 3701100   | Tti2     | Up   | 0.12  | 5.17E-11 | 6.25E-08 | 3k promote  |
| chr5  | 74763101  | 74764100  | Abcc5    | Up   | 0.12  | 4.39E-11 | 5.98E-08 | Genebody    |
| chr5  | 105755901 | 105756900 |          | Up   | 0.12  | 5.12E-11 | 6.25E-08 | Intergenic  |
| chr19 | 28848801  | 28849800  |          | Up   | 0.11  | 2.60E-11 | 4.48E-08 | Intergenic  |
| chr14 | 34025901  | 34026900  |          | Up   | 0.11  | 5.48E-11 | 6.41E-08 | Intergenic  |
| chr2  | 202059401 | 202060400 |          | Up   | 0.11  | 8.28E-11 | 8.99E-08 | Intergenic  |
| chr8  | 80265001  | 80266000  | Leo1     | Up   | 0.1   | 3.03E-11 | 4.52E-08 | 1k promote  |
| chr14 | 5950001   | 5951000   | Abcg3l3  | Up   | 0.1   | 7.55E-11 | 8.54E-08 | 1k promote  |
| chr7  | 13582501  | 13583500  | Zfp709l2 | Up   | 0.1   | 8.35E-11 | 9.03E-08 | 1k promote  |
| chr1  | 228401801 | 228402800 | Cbwd1    | Up   | 0.1   | 2.77E-11 | 4.48E-08 | proximal pr |
| chr8  | 63485301  | 63486300  | Pkm2     | Up   | 0.09  | 1.03E-10 | 1.08E-07 | 1k promote  |
| chr2  | 212826201 | 212827200 | Pum2     | Up   | 0.09  | 2.40E-11 | 4.48E-08 | 3k promote  |
| chr16 | 64894401  | 64895400  | Ecat1    | Up   | 0.09  | 2.81E-11 | 4.48E-08 | 3k promote  |
| chr3  | 124608401 | 124609900 | Ankrd5   | Up   | 0.09  | 6.63E-11 | 7.64E-08 | proximal pr |
| chr16 | 62297501  | 62298500  | Gsr      | Up   | 0.08  | 3.37E-11 | 4.83E-08 | 1k promote  |
| chr7  | 1384001   | 1385000   |          | Up   | 0.08  | 5.42E-11 | 6.39E-08 | Intergenic  |
| chr3  | 14448701  | 14449700  | Ggta1    | Up   | 0.07  | 3.22E-11 | 4.64E-08 | 1k promote  |
| chr15 | 10753901  | 10754900  |          | Up   | 0.07  | 2.49E-11 | 4.48E-08 | Intergenic  |
| chr7  | 13080101  | 13081100  |          | Up   | 0.07  | 5.35E-11 | 6.34E-08 | Intergenic  |
| chr1  | 68019301  | 68020300  |          | Up   | 0.05  | 7.97E-11 | 8.70E-08 | Intergenic  |
| chr1  | 78691801  | 78692800  |          | Up   | 0.05  | 1.32E-10 | 1.37E-07 | Intergenic  |
| chr4  | 75896501  | 75897700  |          | Up   | 0.05  | 2.07E-10 | 2.11E-07 | Intergenic  |
| chr10 | 2134001   | 2135000   |          | Up   | 0.03  | 5.13E-11 | 6.25E-08 | Intergenic  |
| chr6  | 32153701  | 32154700  | Atp2c1   | Up   | 0.02  | 5.09E-11 | 6.25E-08 | 3k promote  |
| chr12 | 39020501  | 39021500  |          | Up   | 0.02  | 5.13E-11 | 6.25E-08 | Intergenic  |
| chr8  | 77868201  | 77869200  | Rapgef6  | Up   | 0.01  | 6.57E-11 | 7.61E-08 | 3k promote  |
| chr1  | 51218401  | 51219400  |          | Down | -0.01 | 1.31E-10 | 1.36E-07 | Intergenic  |
| chr8  | 110602101 | 110603100 | 6-Mar    | Down | -0.02 | 9.10E-11 | 9.71E-08 | 3k promote  |

|       |           |           |          |      |       |          |          |            |
|-------|-----------|-----------|----------|------|-------|----------|----------|------------|
| chr7  | 13581801  | 13582800  | Zfp709l2 | Down | -0.03 | 7.86E-11 | 8.67E-08 | 1k promote |
| chr10 | 39936501  | 39937500  | Coq10b   | Down | -0.03 | 7.61E-11 | 8.54E-08 | 3k promote |
| chr9  | 85241301  | 85242300  |          | Down | -0.04 | 4.50E-11 | 6.10E-08 | Intergenic |
| chr3  | 41919101  | 41920100  | RGD13081 | Down | -0.06 | 5.04E-11 | 6.25E-08 | 3k promote |
| chr1  | 52072701  | 52073800  |          | Down | -0.06 | 7.65E-11 | 8.54E-08 | Intergenic |
| chr12 | 39021001  | 39022100  |          | Down | -0.1  | 7.62E-11 | 8.54E-08 | Intergenic |
| chr6  | 129936201 | 129937200 | Papola   | Down | -0.12 | 5.29E-11 | 6.30E-08 | 1k promote |
| chr2  | 154295601 | 154296600 |          | Down | -0.12 | 2.71E-11 | 4.48E-08 | Intergenic |
| chr16 | 21667901  | 21669900  |          | Down | -0.12 | 9.92E-11 | 1.05E-07 | Intergenic |
| chr6  | 75039501  | 75040500  |          | Down | -0.13 | 1.11E-11 | 4.48E-08 | Intergenic |
| chr1  | 51324001  | 51325000  |          | Down | -0.15 | 1.09E-11 | 4.48E-08 | Intergenic |
| chr1  | 262034701 | 262035700 | G3bp1    | Down | -0.16 | 1.10E-11 | 4.48E-08 | Genebody   |
| chr5  | 121911701 | 121912700 |          | Down | -0.18 | 2.48E-11 | 4.48E-08 | Intergenic |
| chr11 | 86496901  | 86497900  |          | Down | -0.19 | 1.11E-11 | 4.48E-08 | Intergenic |
| chr16 | 20659101  | 20660100  |          | Down | -0.19 | 1.23E-11 | 4.48E-08 | Intergenic |
| chr16 | 22037801  | 22038800  |          | Down | -0.19 | 1.13E-11 | 4.48E-08 | Intergenic |
| chr3  | 149088401 | 149089400 |          | Down | -0.2  | 1.15E-11 | 4.48E-08 | Intergenic |
| chr7  | 13589501  | 13591100  | Rhobtb1  | Down | -0.22 | 1.12E-11 | 4.48E-08 | Genebody   |
| chr16 | 20675901  | 20676900  |          | Down | -0.22 | 1.13E-11 | 4.48E-08 | Intergenic |
| chr17 | 14337201  | 14338200  |          | Down | -0.23 | 1.33E-11 | 4.48E-08 | Intergenic |
| chr9  | 53859401  | 53860800  | Derl1    | Down | -0.25 | 1.52E-11 | 4.48E-08 | 3k promote |
| chr1  | 50651201  | 50652200  |          | Down | -0.26 | 3.20E-05 | 0.00455  | Intergenic |
| chr5  | 25574901  | 25575900  |          | Down | -0.27 | 1.13E-11 | 4.48E-08 | Intergenic |
| chr16 | 21586301  | 21587300  |          | Down | -0.29 | 1.78E-11 | 4.48E-08 | Intergenic |
| chr5  | 129230701 | 129231700 | Scp2     | Down | -0.31 | 1.80E-11 | 4.48E-08 | 1k promote |
| chr1  | 199861901 | 199862900 |          | Down | -0.33 | 2.21E-11 | 4.48E-08 | Intergenic |
| chr1  | 52577801  | 52578800  |          | Down | -0.36 | 1.16E-11 | 4.48E-08 | Intergenic |
| chr1  | 267187501 | 267188500 | Slc38a1  | Down | -0.37 | 2.30E-11 | 4.48E-08 | 3k promote |
| chr5  | 25343601  | 25345000  |          | Down | -0.43 | 3.89E-05 | 0.005249 | Intergenic |
| chr16 | 20931101  | 20932400  |          | Down | -0.47 | 2.10E-06 | 0.000624 | Intergenic |
| chrX  | 130204201 | 130205300 |          | Down | -0.48 | 7.49E-05 | 0.008288 | Intergenic |
| chrX  | 129484801 | 129487600 |          | Down | -0.49 | 0.000173 | 0.016832 | Intergenic |
| chr3  | 158056401 | 158057400 |          | Down | -0.5  | 2.22E-11 | 4.48E-08 | Intergenic |
| chr1  | 52804201  | 52805200  |          | Down | -0.51 | 1.36E-11 | 4.48E-08 | Intergenic |
| chr16 | 20545601  | 20546600  |          | Down | -0.51 | 2.85E-05 | 0.004182 | Intergenic |
| chr5  | 25386701  | 25388300  |          | Down | -0.55 | 3.19E-06 | 0.000837 | Intergenic |
| chr1  | 187737201 | 187738200 |          | Down | -0.56 | 5.66E-05 | 0.006837 | Intergenic |
| chrX  | 130518901 | 130520000 |          | Down | -0.56 | 0.000119 | 0.011788 | Intergenic |
| chrX  | 129628701 | 129630400 |          | Down | -0.57 | 2.10E-06 | 0.000624 | Intergenic |
| chrX  | 129075401 | 129076800 |          | Down | -0.57 | 0.000125 | 0.012371 | Intergenic |
| chr7  | 16448201  | 16449200  |          | Down | -0.58 | 1.37E-10 | 1.41E-07 | Intergenic |
| chrX  | 130438101 | 130439200 |          | Down | -0.58 | 7.12E-06 | 0.001512 | Intergenic |
| chrX  | 129792901 | 129796700 |          | Down | -0.6  | 1.21E-05 | 0.002241 | Intergenic |
| chr16 | 20543001  | 20544400  |          | Down | -0.6  | 3.08E-05 | 0.004422 | Intergenic |
| chr1  | 224403801 | 224405300 |          | Down | -0.6  | 0.000124 | 0.012239 | Intergenic |
| chr7  | 94597801  | 94598800  | Rnf13    | Down | -0.61 | 9.80E-06 | 0.001932 | 3k promote |
| chr4  | 119307201 | 119308200 |          | Down | -0.61 | 1.68E-05 | 0.002872 | Intergenic |
| chr20 | 9178301   | 9179800   |          | Down | -0.62 | 8.46E-05 | 0.00904  | Intergenic |

|       |           |           |         |      |       |          |          |            |
|-------|-----------|-----------|---------|------|-------|----------|----------|------------|
| chr16 | 20905301  | 20906400  |         | Down | -0.64 | 1.07E-05 | 0.002066 | Intergenic |
| chrX  | 130459001 | 130460000 |         | Down | -0.64 | 2.16E-05 | 0.003437 | Intergenic |
| chrX  | 130499801 | 130501000 |         | Down | -0.64 | 3.54E-05 | 0.004896 | Intergenic |
| chr11 | 82730601  | 82731600  | 7-Mar   | Down | -0.65 | 2.26E-05 | 0.003568 | Genebody   |
| chr16 | 20575801  | 20577000  |         | Down | -0.65 | 2.42E-06 | 0.000685 | Intergenic |
| chrX  | 129441801 | 129443000 |         | Down | -0.65 | 8.02E-05 | 0.008681 | Intergenic |
| chrX  | 130177301 | 130178700 |         | Down | -0.66 | 5.35E-05 | 0.006559 | Intergenic |
| chr16 | 21099701  | 21100700  |         | Down | -0.66 | 9.81E-05 | 0.009936 | Intergenic |
| chr10 | 40900201  | 40901200  | Slco1a1 | Down | -0.67 | 7.35E-05 | 0.008214 | Genebody   |
| chr20 | 20122301  | 20123300  | Jmjd1c  | Down | -0.67 | 0.000309 | 0.029433 | Genebody   |
| chrX  | 129577801 | 129578800 |         | Down | -0.67 | 8.65E-05 | 0.009173 | Intergenic |
| chr6  | 138914401 | 138916700 |         | Down | -0.69 | 8.51E-07 | 0.000349 | Intergenic |
| chrX  | 129850701 | 129852900 |         | Down | -0.69 | 1.34E-06 | 0.000467 | Intergenic |
| chrX  | 130102201 | 130103400 |         | Down | -0.69 | 2.12E-06 | 0.000626 | Intergenic |
| chrX  | 129379901 | 129383100 |         | Down | -0.69 | 2.49E-06 | 0.000697 | Intergenic |
| chrX  | 129038001 | 129039400 |         | Down | -0.7  | 4.06E-07 | 0.00023  | Intergenic |
| chr16 | 20897101  | 20900300  |         | Down | -0.7  | 1.70E-06 | 0.000553 | Intergenic |
| chrX  | 129789501 | 129790600 |         | Down | -0.7  | 3.82E-06 | 0.000951 | Intergenic |
| chrX  | 129034001 | 129035700 |         | Down | -0.7  | 4.18E-06 | 0.001017 | Intergenic |
| chr7  | 13494701  | 13495700  |         | Down | -0.7  | 7.63E-05 | 0.008399 | Intergenic |
| chrX  | 129032501 | 129033800 |         | Down | -0.7  | 9.21E-05 | 0.009562 | Intergenic |
| chrX  | 129015701 | 129017200 |         | Down | -0.71 | 2.30E-06 | 0.000666 | Intergenic |
| chr6  | 115389701 | 115391400 |         | Down | -0.71 | 1.71E-05 | 0.002894 | Intergenic |
| chr1  | 206989101 | 206990600 |         | Down | -0.71 | 1.71E-05 | 0.002899 | Intergenic |
| chrX  | 129649801 | 129650800 |         | Down | -0.71 | 5.92E-05 | 0.007054 | Intergenic |
| chr12 | 44407001  | 44408100  |         | Down | -0.71 | 0.000127 | 0.012586 | Intergenic |
| chrX  | 130165901 | 130167100 |         | Down | -0.71 | 0.000128 | 0.012636 | Intergenic |
| chr1  | 75550301  | 75551800  |         | Down | -0.71 | 0.000132 | 0.01298  | Intergenic |
| chr12 | 29004701  | 29005900  | Rimbp2  | Down | -0.72 | 9.85E-12 | 4.48E-08 | Genebody   |
| chrX  | 130159301 | 130160900 |         | Down | -0.72 | 1.41E-06 | 0.000482 | Intergenic |
| chr9  | 110039501 | 110040600 |         | Down | -0.72 | 5.31E-06 | 0.001207 | Intergenic |
| chrX  | 129841701 | 129843100 |         | Down | -0.72 | 4.26E-05 | 0.005608 | Intergenic |
| chr1  | 47912501  | 47913500  |         | Down | -0.72 | 5.20E-05 | 0.006429 | Intergenic |
| chrX  | 129002901 | 129004400 |         | Down | -0.72 | 0.000203 | 0.019638 | Intergenic |
| chr7  | 135313301 | 135314300 | Coro2a  | Down | -0.73 | 1.76E-05 | 0.002956 | 3k promote |
| chr7  | 122988101 | 122989100 |         | Down | -0.73 | 8.84E-05 | 0.009285 | Intergenic |
| chr3  | 123265101 | 123266100 | Plcb1   | Down | -0.74 | 9.58E-05 | 0.00977  | Genebody   |
| chr16 | 20799801  | 20800900  |         | Down | -0.74 | 7.84E-06 | 0.001623 | Intergenic |
| chr16 | 20933201  | 20934300  |         | Down | -0.74 | 2.31E-05 | 0.003611 | Intergenic |
| chr15 | 55791401  | 55792400  |         | Down | -0.74 | 7.34E-05 | 0.008214 | Intergenic |
| chr20 | 23477501  | 23478600  |         | Down | -0.74 | 8.33E-05 | 0.00895  | Intergenic |
| chr16 | 21197801  | 21199100  |         | Down | -0.74 | 0.000214 | 0.020653 | Intergenic |
| chr6  | 145015501 | 145016500 | Rapgef5 | Down | -0.75 | 4.99E-05 | 0.006239 | Genebody   |
| chr11 | 84963201  | 84964600  |         | Down | -0.75 | 2.31E-06 | 0.000666 | Intergenic |
| chr16 | 21347701  | 21348800  |         | Down | -0.75 | 2.43E-05 | 0.003753 | Intergenic |
| chr2  | 230136001 | 230137000 |         | Down | -0.75 | 2.57E-05 | 0.003879 | Intergenic |
| chr14 | 9193301   | 9194300   |         | Down | -0.75 | 7.32E-05 | 0.0082   | Intergenic |
| chr4  | 152536901 | 152538200 | St3gal3 | Down | -0.76 | 1.64E-05 | 0.002811 | Genebody   |

|       |           |           |         |      |       |          |          |            |
|-------|-----------|-----------|---------|------|-------|----------|----------|------------|
| chr16 | 21535801  | 21538200  |         | Down | -0.76 | 1.30E-06 | 0.000457 | Intergenic |
| chr3  | 10366701  | 10367800  |         | Down | -0.76 | 8.93E-05 | 0.009348 | Intergenic |
| chr16 | 21531501  | 21532500  |         | Down | -0.76 | 9.48E-05 | 0.009712 | Intergenic |
| chr16 | 20890601  | 20892200  |         | Down | -0.76 | 0.000508 | 0.047887 | Intergenic |
| chr2  | 146997601 | 146998600 | Pak7    | Down | -0.77 | 7.53E-05 | 0.008319 | 3k promote |
| chr4  | 179546101 | 179547400 | Olah    | Down | -0.77 | 0.000107 | 0.010659 | Genebody   |
| chr8  | 42089401  | 42090800  |         | Down | -0.77 | 7.78E-07 | 0.000329 | Intergenic |
| chr16 | 20577301  | 20581300  |         | Down | -0.77 | 4.79E-06 | 0.001123 | Intergenic |
| chr2  | 58001701  | 58003000  |         | Down | -0.77 | 2.20E-05 | 0.003485 | Intergenic |
| chrX  | 130128601 | 130129900 |         | Down | -0.77 | 3.07E-05 | 0.004418 | Intergenic |
| chr16 | 20795401  | 20796400  |         | Down | -0.77 | 4.77E-05 | 0.006074 | Intergenic |
| chr16 | 20566201  | 20567200  |         | Down | -0.77 | 7.42E-05 | 0.008255 | Intergenic |
| chrX  | 25138701  | 25139700  | Tet1    | Down | -0.78 | 6.13E-05 | 0.007218 | Genebody   |
| chrX  | 129401901 | 129403800 |         | Down | -0.78 | 1.00E-06 | 0.00039  | Intergenic |
| chr5  | 160418601 | 160419600 |         | Down | -0.78 | 9.56E-06 | 0.001905 | Intergenic |
| chr8  | 116454801 | 116455900 |         | Down | -0.78 | 7.71E-05 | 0.008461 | Intergenic |
| chr1  | 204732901 | 204733900 | Cftr    | Down | -0.79 | 0.000459 | 0.043426 | Genebody   |
| chr19 | 23290501  | 23292000  |         | Down | -0.79 | 1.83E-06 | 0.000571 | Intergenic |
| chrX  | 130549601 | 130551000 |         | Down | -0.79 | 3.89E-06 | 0.000963 | Intergenic |
| chrX  | 128958001 | 128959200 |         | Down | -0.79 | 4.97E-06 | 0.001146 | Intergenic |
| chr5  | 158739701 | 158740800 |         | Down | -0.79 | 2.62E-05 | 0.003929 | Intergenic |
| chr5  | 172514401 | 172515500 |         | Down | -0.79 | 0.000139 | 0.013688 | Intergenic |
| chr14 | 49497801  | 49499100  |         | Down | -0.79 | 0.000192 | 0.018591 | Intergenic |
| chr10 | 72734101  | 72735100  | Gpi     | Down | -0.8  | 9.35E-05 | 0.009624 | Genebody   |
| chr16 | 20791201  | 20792700  |         | Down | -0.8  | 4.70E-06 | 0.001108 | Intergenic |
| chr6  | 65368101  | 65369100  |         | Down | -0.8  | 5.67E-05 | 0.006837 | Intergenic |
| chr10 | 43939501  | 43940500  |         | Down | -0.8  | 9.24E-05 | 0.009563 | Intergenic |
| chr6  | 139350801 | 139352000 |         | Down | -0.8  | 0.000131 | 0.012911 | Intergenic |
| chrX  | 130170901 | 130172200 |         | Down | -0.8  | 0.00029  | 0.027726 | Intergenic |
| chr5  | 63154401  | 63155700  | P2rx5   | Down | -0.81 | 0.000259 | 0.024831 | 3k promote |
| chr11 | 69559201  | 69560200  | Shank2  | Down | -0.81 | 5.27E-05 | 0.006485 | Genebody   |
| chrX  | 129099101 | 129102000 |         | Down | -0.81 | 3.37E-06 | 0.000872 | Intergenic |
| chrX  | 128869501 | 128876300 |         | Down | -0.81 | 3.77E-06 | 0.000943 | Intergenic |
| chrX  | 130502201 | 130505700 |         | Down | -0.81 | 6.42E-06 | 0.001394 | Intergenic |
| chrX  | 129116801 | 129117800 |         | Down | -0.81 | 1.88E-05 | 0.003099 | Intergenic |
| chrX  | 128985301 | 128986700 |         | Down | -0.81 | 0.00014  | 0.013768 | Intergenic |
| chr5  | 138554001 | 138555300 | Aatf    | Down | -0.82 | 3.14E-05 | 0.004483 | Genebody   |
| chr3  | 140960501 | 140961500 |         | Down | -0.82 | 4.97E-05 | 0.006228 | Intergenic |
| chr6  | 138674401 | 138675400 |         | Down | -0.82 | 5.01E-05 | 0.006262 | Intergenic |
| chr16 | 27629301  | 27630300  |         | Down | -0.82 | 5.14E-05 | 0.006375 | Intergenic |
| chr14 | 83949201  | 83950200  |         | Down | -0.82 | 6.88E-05 | 0.007849 | Intergenic |
| chr20 | 31789101  | 31790200  |         | Down | -0.82 | 8.35E-05 | 0.008958 | Intergenic |
| chr8  | 22355801  | 22357100  |         | Down | -0.82 | 0.0002   | 0.019417 | Intergenic |
| chr12 | 6090101   | 6091100   | Lmcd1   | Down | -0.83 | 3.34E-05 | 0.004691 | Genebody   |
| chr15 | 5628301   | 5629500   | Cacnb1  | Down | -0.83 | 3.67E-05 | 0.005039 | Genebody   |
| chrX  | 22223601  | 22224900  | lqcg    | Down | -0.83 | 8.87E-05 | 0.009306 | Genebody   |
| chr9  | 13556301  | 13558000  |         | Down | -0.83 | 1.39E-05 | 0.002477 | Intergenic |
| chr3  | 124454701 | 124456000 | Madcam1 | Down | -0.84 | 2.29E-06 | 0.000663 | 3k promote |

|       |           |           |          |      |       |          |          |            |
|-------|-----------|-----------|----------|------|-------|----------|----------|------------|
| chr10 | 60036701  | 60037800  | LOC10027 | Down | -0.84 | 0.000113 | 0.011239 | 3k promote |
| chr7  | 54616001  | 54617100  | Tmem19   | Down | -0.84 | 7.44E-05 | 0.008255 | Genebody   |
| chr17 | 86017001  | 86018100  | Cyp2c7   | Down | -0.84 | 0.000189 | 0.018369 | Genebody   |
| chr16 | 21357601  | 21360100  |          | Down | -0.84 | 7.79E-06 | 0.001616 | Intergenic |
| chr16 | 21207401  | 21209600  |          | Down | -0.84 | 1.13E-05 | 0.002136 | Intergenic |
| chr15 | 55136101  | 55137500  |          | Down | -0.84 | 5.54E-05 | 0.006739 | Intergenic |
| chr1  | 157801    | 158800    |          | Down | -0.84 | 6.28E-05 | 0.007356 | Intergenic |
| chr13 | 91487501  | 91488600  |          | Down | -0.84 | 9.47E-05 | 0.009712 | Intergenic |
| chr9  | 845701    | 846700    |          | Down | -0.84 | 9.61E-05 | 0.009785 | Intergenic |
| chr19 | 45286301  | 45287500  |          | Down | -0.84 | 0.000152 | 0.01486  | Intergenic |
| chr7  | 122347901 | 122349000 |          | Down | -0.84 | 0.00021  | 0.020332 | Intergenic |
| chr7  | 11558201  | 11559400  | Crebbp   | Down | -0.85 | 2.10E-06 | 0.000624 | 3k promote |
| chr6  | 77577701  | 77578700  | RGD15608 | Down | -0.85 | 4.04E-05 | 0.005389 | Genebody   |
| chr16 | 21573401  | 21575000  |          | Down | -0.85 | 1.55E-06 | 0.000518 | Intergenic |
| chr6  | 139826001 | 139827000 |          | Down | -0.85 | 2.64E-06 | 0.000727 | Intergenic |
| chr7  | 132264601 | 132265800 |          | Down | -0.85 | 3.41E-06 | 0.000879 | Intergenic |
| chr1  | 71953401  | 71955100  |          | Down | -0.85 | 2.50E-05 | 0.003819 | Intergenic |
| chr17 | 49429501  | 49430500  |          | Down | -0.85 | 3.30E-05 | 0.004652 | Intergenic |
| chrX  | 129631901 | 129633000 |          | Down | -0.85 | 4.26E-05 | 0.005608 | Intergenic |
| chr1  | 262475201 | 262476200 |          | Down | -0.85 | 4.35E-05 | 0.005696 | Intergenic |
| chr14 | 100487101 | 100488100 |          | Down | -0.85 | 4.95E-05 | 0.006227 | Intergenic |
| chrX  | 129124901 | 129125900 |          | Down | -0.85 | 6.00E-05 | 0.00712  | Intergenic |
| chr14 | 93856601  | 93857600  |          | Down | -0.85 | 7.37E-05 | 0.008229 | Intergenic |
| chr19 | 47517901  | 47518900  | Bard1    | Down | -0.86 | 7.59E-06 | 0.001586 | Genebody   |
| chr10 | 110529001 | 110530000 | Kpnb1    | Down | -0.86 | 0.000107 | 0.010704 | Genebody   |
| chr16 | 20764101  | 20768800  |          | Down | -0.86 | 2.35E-06 | 0.000671 | Intergenic |
| chr16 | 20751201  | 20753100  |          | Down | -0.86 | 7.48E-06 | 0.001568 | Intergenic |
| chr4  | 161306901 | 161308400 |          | Down | -0.86 | 1.21E-05 | 0.00224  | Intergenic |
| chr1  | 52368201  | 52369600  |          | Down | -0.86 | 1.69E-05 | 0.002875 | Intergenic |
| chrX  | 129560001 | 129561700 |          | Down | -0.86 | 1.83E-05 | 0.003056 | Intergenic |
| chrX  | 130197101 | 130198100 |          | Down | -0.86 | 2.14E-05 | 0.003431 | Intergenic |
| chr6  | 48530301  | 48531600  |          | Down | -0.86 | 2.25E-05 | 0.003551 | Intergenic |
| chr16 | 20728101  | 20729100  |          | Down | -0.86 | 3.16E-05 | 0.004503 | Intergenic |
| chr5  | 61778401  | 61779700  |          | Down | -0.86 | 3.25E-05 | 0.004604 | Intergenic |
| chr6  | 139369801 | 139370800 |          | Down | -0.86 | 9.35E-05 | 0.009624 | Intergenic |
| chr4  | 77343701  | 77344700  |          | Down | -0.86 | 9.83E-05 | 0.009951 | Intergenic |
| chr5  | 4511601   | 4513000   |          | Down | -0.86 | 0.000179 | 0.017444 | Intergenic |
| chr7  | 109608001 | 109609600 |          | Down | -0.86 | 0.000254 | 0.024392 | Intergenic |
| chr1  | 184407501 | 184408600 | Ascc3l1  | Down | -0.87 | 7.17E-05 | 0.008077 | 3k promote |
| chr10 | 11600101  | 11601100  | Rad51c   | Down | -0.87 | 7.39E-05 | 0.008238 | 3k promote |
| chr3  | 114705801 | 114706900 | Zfp292   | Down | -0.87 | 9.14E-05 | 0.009506 | 3k promote |
| chr7  | 142211201 | 142213100 |          | Down | -0.87 | 3.50E-07 | 0.000212 | Intergenic |
| chr6  | 138923601 | 138925900 |          | Down | -0.87 | 1.16E-06 | 0.000428 | Intergenic |
| chr2  | 52283401  | 52285000  |          | Down | -0.87 | 2.23E-06 | 0.000648 | Intergenic |
| chr1  | 47770501  | 47771700  |          | Down | -0.87 | 1.12E-05 | 0.002126 | Intergenic |
| chrX  | 128884201 | 128887500 |          | Down | -0.87 | 1.15E-05 | 0.002156 | Intergenic |
| chr16 | 20617101  | 20619200  |          | Down | -0.87 | 1.81E-05 | 0.003026 | Intergenic |
| chrX  | 129566301 | 129567400 |          | Down | -0.87 | 1.84E-05 | 0.003062 | Intergenic |

|       |           |           |           |      |       |          |          |            |
|-------|-----------|-----------|-----------|------|-------|----------|----------|------------|
| chrX  | 129464201 | 129465200 |           | Down | -0.87 | 6.03E-05 | 0.007141 | Intergenic |
| chr20 | 10929401  | 10930400  |           | Down | -0.87 | 7.33E-05 | 0.008213 | Intergenic |
| chr1  | 192449901 | 192450900 |           | Down | -0.87 | 8.39E-05 | 0.008977 | Intergenic |
| chr5  | 68009501  | 68010500  |           | Down | -0.87 | 9.61E-05 | 0.009785 | Intergenic |
| chr10 | 75719201  | 75720200  | Nfs1      | Down | -0.88 | 6.47E-05 | 0.007516 | 3k promote |
| chr5  | 51520101  | 51521100  | Prss42    | Down | -0.88 | 6.93E-05 | 0.007885 | 3k promote |
| chr2  | 181032501 | 181033600 | Spetex-2H | Down | -0.88 | 1.53E-05 | 0.002682 | Genebody   |
| chr1  | 46499201  | 46501400  | Slc25a21  | Down | -0.88 | 6.24E-05 | 0.007327 | Genebody   |
| chr10 | 87377001  | 87378100  | Mapk10    | Down | -0.88 | 6.66E-05 | 0.007683 | Genebody   |
| chr17 | 10037701  | 10038700  |           | Down | -0.88 | 8.39E-07 | 0.000347 | Intergenic |
| chr16 | 22009801  | 22011400  |           | Down | -0.88 | 2.45E-06 | 0.000691 | Intergenic |
| chr1  | 75551901  | 75553300  |           | Down | -0.88 | 1.29E-05 | 0.002342 | Intergenic |
| chrX  | 128964301 | 128965500 |           | Down | -0.88 | 2.77E-05 | 0.004092 | Intergenic |
| chrX  | 128962401 | 128963700 |           | Down | -0.88 | 3.09E-05 | 0.00443  | Intergenic |
| chr19 | 39995201  | 39996200  |           | Down | -0.88 | 4.40E-05 | 0.005733 | Intergenic |
| chrX  | 130449501 | 130450500 |           | Down | -0.88 | 4.52E-05 | 0.005842 | Intergenic |
| chr1  | 240042901 | 240043900 |           | Down | -0.88 | 6.70E-05 | 0.007716 | Intergenic |
| chr12 | 37341301  | 37342300  |           | Down | -0.88 | 7.46E-05 | 0.008257 | Intergenic |
| chrX  | 129214101 | 129215300 |           | Down | -0.88 | 0.000298 | 0.028416 | Intergenic |
| chr16 | 21239801  | 21241000  |           | Down | -0.88 | 0.000434 | 0.041092 | Intergenic |
| chr16 | 21638201  | 21639500  |           | Down | -0.88 | 0.000474 | 0.04486  | Intergenic |
| chr3  | 146548601 | 146549600 | Odf3l2    | Down | -0.89 | 4.61E-05 | 0.005914 | 3k promote |
| chr1  | 86677301  | 86678400  | Fbxw2     | Down | -0.89 | 3.71E-06 | 0.000935 | Genebody   |
| chr10 | 86769501  | 86770700  | Ash1l     | Down | -0.89 | 2.75E-05 | 0.004068 | Genebody   |
| chr14 | 42365901  | 42366900  | Cmpip     | Down | -0.89 | 4.00E-05 | 0.005344 | Genebody   |
| chr1  | 191372501 | 191374400 |           | Down | -0.89 | 5.83E-07 | 0.00028  | Intergenic |
| chr16 | 20864001  | 20865200  |           | Down | -0.89 | 1.57E-06 | 0.000521 | Intergenic |
| chr1  | 52797901  | 52799000  |           | Down | -0.89 | 7.82E-06 | 0.00162  | Intergenic |
| chr6  | 139713801 | 139715900 |           | Down | -0.89 | 1.21E-05 | 0.00224  | Intergenic |
| chr16 | 14085201  | 14086200  |           | Down | -0.89 | 2.35E-05 | 0.003658 | Intergenic |
| chr7  | 48200301  | 48201300  |           | Down | -0.89 | 7.00E-05 | 0.007938 | Intergenic |
| chr6  | 8914601   | 8915600   |           | Down | -0.89 | 8.19E-05 | 0.008844 | Intergenic |
| chr15 | 4608201   | 4609200   |           | Down | -0.89 | 8.69E-05 | 0.009183 | Intergenic |
| chr7  | 35336701  | 35337700  |           | Down | -0.89 | 8.71E-05 | 0.009187 | Intergenic |
| chr16 | 69083601  | 69084600  |           | Down | -0.89 | 8.79E-05 | 0.00926  | Intergenic |
| chrX  | 129211601 | 129213200 |           | Down | -0.89 | 9.32E-05 | 0.009612 | Intergenic |
| chr12 | 10399501  | 10400500  |           | Down | -0.89 | 9.49E-05 | 0.009718 | Intergenic |
| chr4  | 123798401 | 123800100 |           | Down | -0.89 | 0.00015  | 0.014677 | Intergenic |
| chr3  | 16980501  | 16981900  |           | Down | -0.89 | 0.000301 | 0.028696 | Intergenic |
| chr8  | 124740101 | 124741100 | Foxk2     | Down | -0.9  | 2.66E-05 | 0.003984 | Genebody   |
| chr3  | 158819801 | 158821000 |           | Down | -0.9  | 4.25E-06 | 0.001029 | Intergenic |
| chr16 | 20428701  | 20429900  |           | Down | -0.9  | 5.24E-06 | 0.001195 | Intergenic |
| chrX  | 129868901 | 129870700 |           | Down | -0.9  | 7.50E-06 | 0.00157  | Intergenic |
| chrX  | 129143701 | 129144900 |           | Down | -0.9  | 8.70E-06 | 0.001762 | Intergenic |
| chr6  | 97321601  | 97322600  |           | Down | -0.9  | 1.49E-05 | 0.002621 | Intergenic |
| chr6  | 138869001 | 138870300 |           | Down | -0.9  | 1.73E-05 | 0.002926 | Intergenic |
| chrX  | 130056601 | 130057600 |           | Down | -0.9  | 6.77E-05 | 0.007769 | Intergenic |
| chr1  | 181940401 | 181941400 |           | Down | -0.9  | 7.05E-05 | 0.007973 | Intergenic |

|       |           |           |          |      |       |          |          |            |
|-------|-----------|-----------|----------|------|-------|----------|----------|------------|
| chr3  | 98106601  | 98107600  |          | Down | -0.9  | 7.39E-05 | 0.008238 | Intergenic |
| chrX  | 129242001 | 129243000 |          | Down | -0.9  | 7.88E-05 | 0.008566 | Intergenic |
| chr7  | 11569901  | 11570900  |          | Down | -0.9  | 8.19E-05 | 0.008844 | Intergenic |
| chr14 | 30760501  | 30761600  |          | Down | -0.9  | 0.000217 | 0.020959 | Intergenic |
| chr19 | 167501    | 169100    |          | Down | -0.9  | 0.000477 | 0.04507  | Intergenic |
| chr8  | 115178701 | 115179700 | Mtpn     | Down | -0.91 | 4.24E-05 | 0.005597 | 3k promote |
| chr7  | 131908301 | 131909300 | Zbp2     | Down | -0.91 | 2.76E-05 | 0.004086 | Genebody   |
| chr15 | 6227501   | 6228900   | Hoga1    | Down | -0.91 | 4.61E-05 | 0.005915 | Genebody   |
| chr18 | 61298801  | 61299800  | Crebbp   | Down | -0.91 | 4.78E-05 | 0.00608  | Genebody   |
| chr16 | 21527101  | 21529300  |          | Down | -0.91 | 1.62E-06 | 0.000531 | Intergenic |
| chrX  | 129391701 | 129393100 |          | Down | -0.91 | 2.07E-06 | 0.000619 | Intergenic |
| chr5  | 114470101 | 114471900 |          | Down | -0.91 | 5.32E-06 | 0.001208 | Intergenic |
| chr16 | 20621201  | 20622700  |          | Down | -0.91 | 6.03E-06 | 0.001328 | Intergenic |
| chr4  | 16331501  | 16333000  |          | Down | -0.91 | 1.05E-05 | 0.002032 | Intergenic |
| chr7  | 25308101  | 25309100  |          | Down | -0.91 | 1.15E-05 | 0.002169 | Intergenic |
| chr3  | 114065401 | 114066500 |          | Down | -0.91 | 1.18E-05 | 0.002199 | Intergenic |
| chr14 | 2988101   | 2989600   |          | Down | -0.91 | 1.49E-05 | 0.002621 | Intergenic |
| chr2  | 52277001  | 52278000  |          | Down | -0.91 | 2.54E-05 | 0.003847 | Intergenic |
| chr16 | 21624301  | 21625600  |          | Down | -0.91 | 2.78E-05 | 0.004111 | Intergenic |
| chr12 | 3183101   | 3184100   |          | Down | -0.91 | 4.27E-05 | 0.005615 | Intergenic |
| chr12 | 38184601  | 38185600  |          | Down | -0.91 | 8.78E-05 | 0.009247 | Intergenic |
| chr3  | 138255701 | 138256900 |          | Down | -0.91 | 9.64E-05 | 0.00981  | Intergenic |
| chr15 | 89613701  | 89614700  |          | Down | -0.91 | 9.67E-05 | 0.009836 | Intergenic |
| chr7  | 11574201  | 11575200  | Dnaja3   | Down | -0.92 | 1.80E-05 | 0.003007 | 3k promote |
| chr3  | 47656701  | 47657700  | LOC36093 | Down | -0.92 | 2.94E-05 | 0.004273 | Genebody   |
| chr5  | 154118301 | 154119300 | Scn11a   | Down | -0.92 | 3.51E-05 | 0.004866 | Genebody   |
| chr7  | 138520501 | 138521500 | Pphln1   | Down | -0.92 | 9.22E-05 | 0.009562 | Genebody   |
| chr16 | 21201801  | 21204000  |          | Down | -0.92 | 5.50E-07 | 0.000272 | Intergenic |
| chrX  | 129218601 | 129219900 |          | Down | -0.92 | 1.26E-06 | 0.000451 | Intergenic |
| chrX  | 128881901 | 128883800 |          | Down | -0.92 | 1.84E-06 | 0.000571 | Intergenic |
| chrX  | 129764001 | 129766900 |          | Down | -0.92 | 2.32E-06 | 0.000668 | Intergenic |
| chrX  | 129448101 | 129450800 |          | Down | -0.92 | 3.23E-06 | 0.000844 | Intergenic |
| chr19 | 44510401  | 44512300  |          | Down | -0.92 | 7.73E-06 | 0.001605 | Intergenic |
| chr4  | 129255001 | 129256100 |          | Down | -0.92 | 1.55E-05 | 0.002702 | Intergenic |
| chr11 | 81692201  | 81693200  |          | Down | -0.92 | 1.56E-05 | 0.002712 | Intergenic |
| chr2  | 52295201  | 52296900  |          | Down | -0.92 | 2.99E-05 | 0.00433  | Intergenic |
| chr1  | 230801701 | 230803400 |          | Down | -0.92 | 3.82E-05 | 0.005172 | Intergenic |
| chr7  | 33701601  | 33702600  |          | Down | -0.92 | 5.03E-05 | 0.006272 | Intergenic |
| chr8  | 32458301  | 32459300  |          | Down | -0.92 | 8.48E-05 | 0.009052 | Intergenic |
| chr1  | 47869501  | 47870700  |          | Down | -0.92 | 9.06E-05 | 0.009455 | Intergenic |
| chr7  | 46654801  | 46655800  |          | Down | -0.92 | 9.21E-05 | 0.009562 | Intergenic |
| chr1  | 111370901 | 111371900 |          | Down | -0.92 | 9.29E-05 | 0.009591 | Intergenic |
| chr5  | 70812201  | 70813300  |          | Down | -0.92 | 0.000102 | 0.010216 | Intergenic |
| chr1  | 51209801  | 51210900  |          | Down | -0.92 | 0.000148 | 0.014559 | Intergenic |
| chr13 | 75570201  | 75571200  | Tnn      | Down | -0.93 | 1.75E-05 | 0.002951 | 1k promote |
| chr4  | 62924901  | 62926100  | Nubpl    | Down | -0.93 | 1.12E-05 | 0.002122 | 3k promote |
| chr10 | 11007301  | 11008300  | Etv3l    | Down | -0.93 | 2.47E-05 | 0.003794 | 3k promote |
| chr1  | 81860101  | 81861100  | Brpf3    | Down | -0.93 | 4.96E-06 | 0.001146 | Genebody   |



|       |           |           |           |      |       |          |          |            |
|-------|-----------|-----------|-----------|------|-------|----------|----------|------------|
| chr3  | 13815901  | 13817500  | Spetex-2C | Down | -0.93 | 7.97E-06 | 0.001644 | Genebody   |
| chr19 | 26769601  | 26770600  | Nedd4l    | Down | -0.93 | 7.84E-05 | 0.008539 | Genebody   |
| chr5  | 140417401 | 140419300 |           | Down | -0.93 | 4.59E-07 | 0.000244 | Intergenic |
| chr16 | 20804901  | 20806400  |           | Down | -0.93 | 5.22E-07 | 0.000263 | Intergenic |
| chr16 | 20735101  | 20738900  |           | Down | -0.93 | 2.24E-06 | 0.00065  | Intergenic |
| chr16 | 39063801  | 39065100  |           | Down | -0.93 | 2.54E-06 | 0.000708 | Intergenic |
| chr6  | 139827601 | 139828900 |           | Down | -0.93 | 3.70E-06 | 0.000934 | Intergenic |
| chrX  | 129878101 | 129879100 |           | Down | -0.93 | 5.21E-06 | 0.00119  | Intergenic |
| chr16 | 21660301  | 21662200  |           | Down | -0.93 | 8.19E-06 | 0.001677 | Intergenic |
| chr6  | 138829801 | 138830900 |           | Down | -0.93 | 1.59E-05 | 0.002748 | Intergenic |
| chr16 | 20444601  | 20446100  |           | Down | -0.93 | 1.70E-05 | 0.002892 | Intergenic |
| chr15 | 4935501   | 4936700   |           | Down | -0.93 | 4.33E-05 | 0.005668 | Intergenic |
| chr8  | 121619001 | 121620000 |           | Down | -0.93 | 4.47E-05 | 0.005808 | Intergenic |
| chr16 | 51144001  | 51145000  |           | Down | -0.93 | 4.57E-05 | 0.005878 | Intergenic |
| chr6  | 139318601 | 139320100 |           | Down | -0.93 | 4.80E-05 | 0.006092 | Intergenic |
| chrX  | 128995801 | 128996800 |           | Down | -0.93 | 8.50E-05 | 0.009073 | Intergenic |
| chr9  | 28485101  | 28486100  |           | Down | -0.93 | 8.62E-05 | 0.009153 | Intergenic |
| chr1  | 49934901  | 49936400  |           | Down | -0.93 | 8.71E-05 | 0.009187 | Intergenic |
| chr1  | 33853301  | 33854500  |           | Down | -0.93 | 8.82E-05 | 0.00928  | Intergenic |
| chr10 | 14006001  | 14007100  |           | Down | -0.93 | 0.000108 | 0.010776 | Intergenic |
| chr20 | 44087101  | 44088300  |           | Down | -0.93 | 0.000199 | 0.019256 | Intergenic |
| chr6  | 139772401 | 139773500 |           | Down | -0.93 | 0.000305 | 0.029084 | Intergenic |
| chr3  | 145448601 | 145449600 | Pum1      | Down | -0.94 | 1.56E-05 | 0.002712 | Genebody   |
| chr1  | 244244201 | 244245300 | Scn2a1    | Down | -0.94 | 2.27E-05 | 0.003574 | Genebody   |
| chr4  | 160959001 | 160960000 | Srrm1     | Down | -0.94 | 8.00E-05 | 0.008666 | Genebody   |
| chr16 | 22017301  | 22019000  |           | Down | -0.94 | 3.14E-07 | 0.000201 | Intergenic |
| chr19 | 165201    | 166900    |           | Down | -0.94 | 4.44E-07 | 0.00024  | Intergenic |
| chrX  | 129451001 | 129454200 |           | Down | -0.94 | 1.26E-06 | 0.000451 | Intergenic |
| chr6  | 139461801 | 139463100 |           | Down | -0.94 | 7.18E-06 | 0.001517 | Intergenic |
| chr10 | 87264101  | 87265100  |           | Down | -0.94 | 1.05E-05 | 0.002029 | Intergenic |
| chr5  | 60217901  | 60219600  |           | Down | -0.94 | 1.14E-05 | 0.002146 | Intergenic |
| chr7  | 51157501  | 51158600  |           | Down | -0.94 | 1.18E-05 | 0.002202 | Intergenic |
| chr18 | 65332401  | 65333400  |           | Down | -0.94 | 2.15E-05 | 0.003433 | Intergenic |
| chr17 | 54974801  | 54975800  |           | Down | -0.94 | 2.45E-05 | 0.003775 | Intergenic |
| chr16 | 21498001  | 21501000  |           | Down | -0.94 | 2.55E-05 | 0.003858 | Intergenic |
| chr1  | 588001    | 589200    |           | Down | -0.94 | 3.72E-05 | 0.005086 | Intergenic |
| chr14 | 4520801   | 4521800   |           | Down | -0.94 | 4.16E-05 | 0.005522 | Intergenic |
| chr8  | 7550401   | 7551500   |           | Down | -0.94 | 4.43E-05 | 0.00577  | Intergenic |
| chr16 | 21564701  | 21565700  |           | Down | -0.94 | 7.58E-05 | 0.008356 | Intergenic |
| chr12 | 16793401  | 16794400  |           | Down | -0.94 | 8.07E-05 | 0.008734 | Intergenic |
| chr7  | 49855901  | 49857000  |           | Down | -0.94 | 9.94E-05 | 0.010033 | Intergenic |
| chr1  | 208451801 | 208453700 |           | Down | -0.94 | 0.000148 | 0.014508 | Intergenic |
| chr3  | 14464901  | 14465900  | Klhl6     | Down | -0.95 | 4.36E-07 | 0.000239 | Genebody   |
| chr10 | 11711301  | 11712400  | Lima1     | Down | -0.95 | 1.14E-05 | 0.002144 | Genebody   |
| chr13 | 40904601  | 40905800  | Cyp2b15   | Down | -0.95 | 4.38E-05 | 0.005725 | Genebody   |
| chr1  | 50447501  | 50448700  |           | Down | -0.95 | 1.07E-06 | 0.000404 | Intergenic |
| chr16 | 20818701  | 20821000  |           | Down | -0.95 | 2.12E-06 | 0.000626 | Intergenic |
| chr6  | 139437701 | 139439400 |           | Down | -0.95 | 4.37E-06 | 0.001049 | Intergenic |

|       |           |           |           |      |       |          |          |            |
|-------|-----------|-----------|-----------|------|-------|----------|----------|------------|
| chr20 | 8938701   | 8939700   |           | Down | -0.95 | 2.97E-05 | 0.004317 | Intergenic |
| chr2  | 27204001  | 27205000  |           | Down | -0.95 | 3.77E-05 | 0.005127 | Intergenic |
| chr17 | 5609501   | 5610500   |           | Down | -0.95 | 4.80E-05 | 0.006092 | Intergenic |
| chr3  | 149214901 | 149215900 |           | Down | -0.95 | 6.09E-05 | 0.007188 | Intergenic |
| chr2  | 187140101 | 187141100 |           | Down | -0.95 | 7.45E-05 | 0.008255 | Intergenic |
| chr9  | 5663901   | 5664900   |           | Down | -0.95 | 8.32E-05 | 0.008941 | Intergenic |
| chr20 | 7341101   | 7342200   |           | Down | -0.95 | 0.000292 | 0.027855 | Intergenic |
| chrX  | 129190401 | 129191700 |           | Down | -0.95 | 0.000478 | 0.045164 | Intergenic |
| chr9  | 1629501   | 1631000   | Kcnq1     | Down | -0.96 | 4.66E-06 | 0.001105 | Genebody   |
| chr1  | 252408901 | 252409900 | Oxr1      | Down | -0.96 | 1.20E-05 | 0.002224 | Genebody   |
| chr8  | 113069001 | 113070000 | Creb1     | Down | -0.96 | 2.56E-05 | 0.003861 | Genebody   |
| chr9  | 70132401  | 70134300  | R3hdm1    | Down | -0.96 | 6.82E-05 | 0.007802 | Genebody   |
| chr12 | 46051401  | 46052500  | Robo1     | Down | -0.96 | 9.91E-05 | 0.010008 | Genebody   |
| chr16 | 20853001  | 20855900  |           | Down | -0.96 | 1.32E-06 | 0.000462 | Intergenic |
| chr19 | 640001    | 641900    |           | Down | -0.96 | 3.43E-06 | 0.000884 | Intergenic |
| chr16 | 20539901  | 20541200  |           | Down | -0.96 | 9.30E-06 | 0.001857 | Intergenic |
| chrX  | 129832001 | 129833100 |           | Down | -0.96 | 1.13E-05 | 0.002141 | Intergenic |
| chr4  | 80983901  | 80984900  |           | Down | -0.96 | 1.85E-05 | 0.003065 | Intergenic |
| chr7  | 72451301  | 72452400  |           | Down | -0.96 | 2.05E-05 | 0.003311 | Intergenic |
| chr6  | 43515001  | 43516000  |           | Down | -0.96 | 3.97E-05 | 0.005321 | Intergenic |
| chr16 | 21594701  | 21596500  |           | Down | -0.96 | 4.45E-05 | 0.005783 | Intergenic |
| chrX  | 129097401 | 129098400 |           | Down | -0.96 | 4.79E-05 | 0.006087 | Intergenic |
| chr16 | 22041201  | 22042200  |           | Down | -0.96 | 5.80E-05 | 0.006959 | Intergenic |
| chr1  | 37806201  | 37807200  |           | Down | -0.96 | 7.47E-05 | 0.008264 | Intergenic |
| chr8  | 39922901  | 39923900  |           | Down | -0.96 | 7.72E-05 | 0.008462 | Intergenic |
| chr19 | 24517301  | 24518300  |           | Down | -0.96 | 7.82E-05 | 0.008529 | Intergenic |
| chr4  | 181547301 | 181548300 |           | Down | -0.96 | 8.62E-05 | 0.009153 | Intergenic |
| chr16 | 22039301  | 22040300  |           | Down | -0.96 | 8.85E-05 | 0.009294 | Intergenic |
| chr10 | 8146701   | 8147700   |           | Down | -0.96 | 8.95E-05 | 0.009365 | Intergenic |
| chr15 | 4709301   | 4710900   |           | Down | -0.96 | 0.000169 | 0.016522 | Intergenic |
| chr6  | 72265301  | 72266400  | Zfp330    | Down | -0.97 | 2.92E-05 | 0.004261 | 3k promote |
| chr2  | 179593201 | 179594200 | Rragc     | Down | -0.97 | 5.25E-05 | 0.006475 | 3k promote |
| chr8  | 110365501 | 110366500 | Rnf150    | Down | -0.97 | 2.31E-05 | 0.003617 | Genebody   |
| chr1  | 56893901  | 56894900  | Asip      | Down | -0.97 | 3.49E-05 | 0.004854 | Genebody   |
| chr2  | 27702801  | 27703800  | Gnb3      | Down | -0.97 | 4.52E-05 | 0.005842 | Genebody   |
| chr1  | 248802001 | 248803200 | LOC502618 | Down | -0.97 | 7.64E-05 | 0.008403 | Genebody   |
| chr11 | 43773701  | 43774700  | Tmem2     | Down | -0.97 | 0.000224 | 0.021541 | Genebody   |
| chr16 | 20815601  | 20818100  |           | Down | -0.97 | 3.42E-07 | 0.00021  | Intergenic |
| chr7  | 11723001  | 11724700  |           | Down | -0.97 | 1.38E-06 | 0.000477 | Intergenic |
| chrX  | 130125201 | 130127000 |           | Down | -0.97 | 1.51E-06 | 0.000508 | Intergenic |
| chr16 | 21583501  | 21584800  |           | Down | -0.97 | 1.56E-06 | 0.000519 | Intergenic |
| chr17 | 13393501  | 13394500  |           | Down | -0.97 | 3.40E-06 | 0.000879 | Intergenic |
| chr20 | 15071701  | 15072800  |           | Down | -0.97 | 4.30E-06 | 0.001037 | Intergenic |
| chrX  | 129102101 | 129104400 |           | Down | -0.97 | 5.45E-06 | 0.001231 | Intergenic |
| chr15 | 57290501  | 57291700  |           | Down | -0.97 | 1.06E-05 | 0.002039 | Intergenic |
| chr15 | 17771001  | 17772000  |           | Down | -0.97 | 1.20E-05 | 0.002232 | Intergenic |
| chr7  | 131462901 | 131463900 |           | Down | -0.97 | 1.41E-05 | 0.002501 | Intergenic |
| chrX  | 129874101 | 129875200 |           | Down | -0.97 | 3.01E-05 | 0.00434  | Intergenic |

|       |           |           |         |      |       |          |          |             |
|-------|-----------|-----------|---------|------|-------|----------|----------|-------------|
| chrX  | 128890101 | 128893300 |         | Down | -0.97 | 3.87E-05 | 0.005229 | Intergenic  |
| chr5  | 141716701 | 141717700 |         | Down | -0.97 | 4.07E-05 | 0.00542  | Intergenic  |
| chr11 | 43190001  | 43191500  |         | Down | -0.97 | 4.89E-05 | 0.006171 | Intergenic  |
| chrX  | 128997701 | 128999500 |         | Down | -0.97 | 6.23E-05 | 0.007319 | Intergenic  |
| chr1  | 58868401  | 58869900  |         | Down | -0.97 | 6.26E-05 | 0.007337 | Intergenic  |
| chr1  | 52397001  | 52398300  |         | Down | -0.97 | 6.29E-05 | 0.007356 | Intergenic  |
| chr15 | 52114601  | 52115600  |         | Down | -0.97 | 6.55E-05 | 0.007583 | Intergenic  |
| chr16 | 21151701  | 21153600  |         | Down | -0.97 | 6.75E-05 | 0.007747 | Intergenic  |
| chr16 | 61637901  | 61638900  |         | Down | -0.97 | 7.78E-05 | 0.008505 | Intergenic  |
| chr14 | 49064401  | 49065700  |         | Down | -0.97 | 9.20E-05 | 0.009558 | Intergenic  |
| chr6  | 139711201 | 139712500 |         | Down | -0.97 | 9.39E-05 | 0.009657 | Intergenic  |
| chr16 | 31850001  | 31851000  |         | Down | -0.97 | 9.73E-05 | 0.009873 | Intergenic  |
| chr16 | 37876701  | 37879600  |         | Down | -0.97 | 0.000138 | 0.013622 | Intergenic  |
| chr1  | 64729401  | 64730700  |         | Down | -0.97 | 0.000247 | 0.023779 | Intergenic  |
| chr13 | 97834301  | 97835300  | Lbr     | Down | -0.97 | 3.29E-06 | 0.000858 | proximal pr |
| chr1  | 138028301 | 138029300 | Abcc5   | Down | -0.98 | 2.18E-06 | 0.000639 | Genebody    |
| chr2  | 3026901   | 3027900   | Usmg5   | Down | -0.98 | 6.67E-05 | 0.007684 | Genebody    |
| chr7  | 110699901 | 110700900 | Rbm6    | Down | -0.98 | 9.27E-05 | 0.009575 | Genebody    |
| chr18 | 33494101  | 33495100  | Col13a1 | Down | -0.98 | 0.000405 | 0.038427 | Genebody    |
| chr16 | 21976301  | 21978500  |         | Down | -0.98 | 4.49E-07 | 0.000241 | Intergenic  |
| chr7  | 116290001 | 116291900 |         | Down | -0.98 | 6.11E-07 | 0.000285 | Intergenic  |
| chrX  | 129289301 | 129291200 |         | Down | -0.98 | 6.11E-07 | 0.000285 | Intergenic  |
| chr14 | 78913501  | 78915400  |         | Down | -0.98 | 6.37E-07 | 0.000293 | Intergenic  |
| chr16 | 21204401  | 21205500  |         | Down | -0.98 | 1.65E-06 | 0.000538 | Intergenic  |
| chr10 | 74698201  | 74700100  |         | Down | -0.98 | 1.83E-06 | 0.000571 | Intergenic  |
| chrX  | 130482001 | 130487300 |         | Down | -0.98 | 2.35E-06 | 0.000671 | Intergenic  |
| chr7  | 669401    | 672400    |         | Down | -0.98 | 2.63E-06 | 0.000724 | Intergenic  |
| chr16 | 21567401  | 21569400  |         | Down | -0.98 | 4.46E-06 | 0.001065 | Intergenic  |
| chr3  | 57365101  | 57366100  |         | Down | -0.98 | 4.61E-06 | 0.001094 | Intergenic  |
| chr6  | 139060701 | 139062600 |         | Down | -0.98 | 4.82E-06 | 0.001123 | Intergenic  |
| chrX  | 129021601 | 129023800 |         | Down | -0.98 | 9.19E-06 | 0.001842 | Intergenic  |
| chr19 | 6146501   | 6147500   |         | Down | -0.98 | 1.05E-05 | 0.002035 | Intergenic  |
| chr16 | 22047501  | 22048500  |         | Down | -0.98 | 1.84E-05 | 0.003059 | Intergenic  |
| chr12 | 21059601  | 21060600  |         | Down | -0.98 | 4.02E-05 | 0.005367 | Intergenic  |
| chr1  | 50728601  | 50729700  |         | Down | -0.98 | 4.05E-05 | 0.0054   | Intergenic  |
| chr20 | 36955701  | 36956700  |         | Down | -0.98 | 4.32E-05 | 0.005664 | Intergenic  |
| chr9  | 39374801  | 39376700  |         | Down | -0.98 | 4.96E-05 | 0.006228 | Intergenic  |
| chr7  | 18822801  | 18823800  |         | Down | -0.98 | 6.62E-05 | 0.007648 | Intergenic  |
| chr7  | 113102201 | 113103200 |         | Down | -0.98 | 7.25E-05 | 0.008136 | Intergenic  |
| chr3  | 145409001 | 145410000 |         | Down | -0.98 | 8.25E-05 | 0.008887 | Intergenic  |
| chr5  | 59392301  | 59393300  |         | Down | -0.98 | 8.52E-05 | 0.009084 | Intergenic  |
| chr16 | 21656701  | 21658600  |         | Down | -0.98 | 0.000102 | 0.010288 | Intergenic  |
| chrX  | 129346601 | 129348200 |         | Down | -0.98 | 0.000153 | 0.014941 | Intergenic  |
| chrX  | 129784101 | 129785400 |         | Down | -0.98 | 0.000256 | 0.024588 | Intergenic  |
| chrX  | 129018401 | 129020700 |         | Down | -0.98 | 0.000305 | 0.02905  | Intergenic  |
| chr16 | 21277901  | 21279100  |         | Down | -0.98 | 0.000324 | 0.030819 | Intergenic  |
| chr19 | 27046801  | 27047800  | Etv1    | Down | -0.99 | 8.33E-06 | 0.001703 | 3k promote  |
| chr5  | 143206101 | 143207100 | Rnf17   | Down | -0.99 | 3.73E-05 | 0.00509  | 3k promote  |

|       |           |           |         |      |       |          |          |            |
|-------|-----------|-----------|---------|------|-------|----------|----------|------------|
| chr6  | 57677301  | 57678400  | Ash2l   | Down | -0.99 | 5.71E-05 | 0.00687  | 3k promote |
| chr4  | 148118601 | 148120000 | Nek11   | Down | -0.99 | 1.04E-05 | 0.002026 | Genebody   |
| chr14 | 78449801  | 78450800  | Parva   | Down | -0.99 | 3.45E-05 | 0.004812 | Genebody   |
| chr3  | 141866501 | 141867700 | Fkbp1a  | Down | -0.99 | 3.74E-05 | 0.005105 | Genebody   |
| chr12 | 6701      | 7700      |         | Down | -0.99 | 4.84E-07 | 0.000251 | Intergenic |
| chrX  | 129220101 | 129221900 |         | Down | -0.99 | 6.95E-07 | 0.000305 | Intergenic |
| chr16 | 20788901  | 20790800  |         | Down | -0.99 | 7.95E-07 | 0.000334 | Intergenic |
| chr1  | 51830401  | 51832100  |         | Down | -0.99 | 1.56E-06 | 0.00052  | Intergenic |
| chr16 | 20536301  | 20539000  |         | Down | -0.99 | 1.72E-06 | 0.000555 | Intergenic |
| chr1  | 47823701  | 47825900  |         | Down | -0.99 | 2.43E-06 | 0.000687 | Intergenic |
| chr16 | 21982401  | 21984000  |         | Down | -0.99 | 6.40E-06 | 0.001391 | Intergenic |
| chr1  | 64641101  | 64642400  |         | Down | -0.99 | 6.86E-06 | 0.001466 | Intergenic |
| chrX  | 129858801 | 129860100 |         | Down | -0.99 | 8.31E-06 | 0.0017   | Intergenic |
| chr7  | 100518901 | 100520800 |         | Down | -0.99 | 9.57E-06 | 0.001905 | Intergenic |
| chr15 | 57308601  | 57309700  |         | Down | -0.99 | 2.37E-05 | 0.003684 | Intergenic |
| chr16 | 20673701  | 20675100  |         | Down | -0.99 | 2.50E-05 | 0.003817 | Intergenic |
| chrX  | 128878901 | 128881100 |         | Down | -0.99 | 2.54E-05 | 0.003847 | Intergenic |
| chr15 | 31158201  | 31159400  |         | Down | -0.99 | 2.64E-05 | 0.003953 | Intergenic |
| chr3  | 16972501  | 16973500  |         | Down | -0.99 | 3.00E-05 | 0.004331 | Intergenic |
| chr19 | 9972501   | 9973600   |         | Down | -0.99 | 3.82E-05 | 0.005172 | Intergenic |
| chr17 | 10147401  | 10148400  |         | Down | -0.99 | 5.12E-05 | 0.006363 | Intergenic |
| chr4  | 27665401  | 27666400  |         | Down | -0.99 | 7.52E-05 | 0.008307 | Intergenic |
| chr20 | 26073201  | 26074200  |         | Down | -0.99 | 7.96E-05 | 0.008633 | Intergenic |
| chr14 | 84654101  | 84655100  |         | Down | -0.99 | 9.14E-05 | 0.009506 | Intergenic |
| chr5  | 140834801 | 140835800 |         | Down | -0.99 | 9.26E-05 | 0.009575 | Intergenic |
| chr5  | 172482601 | 172483600 |         | Down | -0.99 | 9.27E-05 | 0.009575 | Intergenic |
| chr8  | 57595501  | 57596600  |         | Down | -0.99 | 0.00011  | 0.010979 | Intergenic |
| chr2  | 158983301 | 158984300 | Vom2r10 | Down | -1    | 3.90E-05 | 0.005259 | Genebody   |
| chr10 | 95608001  | 95609000  | Enc1    | Down | -1    | 7.29E-05 | 0.008181 | Genebody   |
| chr2  | 184440701 | 184442200 |         | Down | -1    | 8.91E-07 | 0.00036  | Intergenic |
| chrX  | 159425601 | 159427500 |         | Down | -1    | 9.92E-07 | 0.000388 | Intergenic |
| chr6  | 139393001 | 139396000 |         | Down | -1    | 1.01E-06 | 0.000391 | Intergenic |
| chr16 | 21376201  | 21379500  |         | Down | -1    | 1.83E-06 | 0.000571 | Intergenic |
| chr4  | 5742001   | 5743000   |         | Down | -1    | 2.46E-06 | 0.000692 | Intergenic |
| chr2  | 181180801 | 181182000 |         | Down | -1    | 6.80E-06 | 0.001457 | Intergenic |
| chrX  | 128887701 | 128890000 |         | Down | -1    | 7.13E-06 | 0.001514 | Intergenic |
| chrX  | 129294601 | 129296300 |         | Down | -1    | 7.89E-06 | 0.00163  | Intergenic |
| chr16 | 21984801  | 21986700  |         | Down | -1    | 1.13E-05 | 0.002132 | Intergenic |
| chr15 | 19281301  | 19282300  |         | Down | -1    | 2.56E-05 | 0.003861 | Intergenic |
| chr6  | 139065701 | 139066800 |         | Down | -1    | 3.08E-05 | 0.004418 | Intergenic |
| chr19 | 20212001  | 20213000  |         | Down | -1    | 5.06E-05 | 0.006299 | Intergenic |
| chr3  | 112322701 | 112323700 |         | Down | -1    | 5.67E-05 | 0.006837 | Intergenic |
| chr1  | 264447501 | 264449100 |         | Down | -1    | 5.88E-05 | 0.007016 | Intergenic |
| chrX  | 130185201 | 130186700 |         | Down | -1    | 0.000109 | 0.010864 | Intergenic |
| chr1  | 105930801 | 105932400 |         | Down | -1    | 0.000121 | 0.012024 | Intergenic |
| chr14 | 44815101  | 44816100  | Rbm47   | Down | -1.01 | 8.62E-05 | 0.009153 | 1k promote |
| chr15 | 35339601  | 35340600  | Ak2     | Down | -1.01 | 5.55E-05 | 0.006749 | 3k promote |
| chr7  | 19136801  | 19137900  | Ep400   | Down | -1.01 | 4.69E-06 | 0.001107 | Genebody   |

|       |           |           |          |      |       |          |          |            |
|-------|-----------|-----------|----------|------|-------|----------|----------|------------|
| chr7  | 77417301  | 77419100  | RGD13094 | Down | -1.01 | 9.19E-05 | 0.009551 | Genebody   |
| chr11 | 14472101  | 14474000  |          | Down | -1.01 | 3.00E-07 | 0.000194 | Intergenic |
| chr6  | 139371201 | 139373100 |          | Down | -1.01 | 3.33E-07 | 0.000208 | Intergenic |
| chr16 | 21455301  | 21457300  |          | Down | -1.01 | 5.66E-07 | 0.000275 | Intergenic |
| chr6  | 138928401 | 138929700 |          | Down | -1.01 | 7.53E-07 | 0.000322 | Intergenic |
| chr1  | 111359001 | 111360700 |          | Down | -1.01 | 1.14E-06 | 0.00042  | Intergenic |
| chrX  | 130079501 | 130083500 |          | Down | -1.01 | 1.21E-06 | 0.000442 | Intergenic |
| chr6  | 125425301 | 125426400 |          | Down | -1.01 | 1.29E-06 | 0.000456 | Intergenic |
| chr13 | 30373101  | 30374800  |          | Down | -1.01 | 1.50E-06 | 0.000506 | Intergenic |
| chr16 | 21610101  | 21613600  |          | Down | -1.01 | 2.89E-06 | 0.00078  | Intergenic |
| chr16 | 21580301  | 21582100  |          | Down | -1.01 | 9.93E-06 | 0.001953 | Intergenic |
| chr1  | 60326201  | 60327600  |          | Down | -1.01 | 1.25E-05 | 0.002288 | Intergenic |
| chr1  | 33850401  | 33851400  |          | Down | -1.01 | 1.25E-05 | 0.002293 | Intergenic |
| chr17 | 49341601  | 49343500  |          | Down | -1.01 | 1.56E-05 | 0.002712 | Intergenic |
| chr3  | 162567401 | 162568700 |          | Down | -1.01 | 1.76E-05 | 0.002956 | Intergenic |
| chr20 | 38280201  | 38281200  |          | Down | -1.01 | 3.25E-05 | 0.004606 | Intergenic |
| chr17 | 17507501  | 17508700  |          | Down | -1.01 | 3.47E-05 | 0.004828 | Intergenic |
| chrX  | 130319601 | 130320600 |          | Down | -1.01 | 3.57E-05 | 0.004923 | Intergenic |
| chr16 | 21304301  | 21306600  |          | Down | -1.01 | 4.86E-05 | 0.006151 | Intergenic |
| chr1  | 47955501  | 47956500  |          | Down | -1.01 | 4.97E-05 | 0.006228 | Intergenic |
| chr6  | 139536201 | 139537200 |          | Down | -1.01 | 5.60E-05 | 0.006794 | Intergenic |
| chrX  | 65898401  | 65899500  |          | Down | -1.01 | 6.28E-05 | 0.007356 | Intergenic |
| chr2  | 70310001  | 70311000  |          | Down | -1.01 | 6.99E-05 | 0.007925 | Intergenic |
| chr12 | 4597601   | 4598600   |          | Down | -1.01 | 7.54E-05 | 0.00832  | Intergenic |
| chr12 | 25605501  | 25606500  |          | Down | -1.01 | 7.55E-05 | 0.00833  | Intergenic |
| chr16 | 70615401  | 70616400  | Ip6k1    | Down | -1.02 | 3.10E-06 | 0.000818 | 3k promote |
| chr12 | 17575001  | 17576000  | Efhb     | Down | -1.02 | 6.09E-06 | 0.001336 | Genebody   |
| chr4  | 43902701  | 43903900  | Btbd1    | Down | -1.02 | 1.21E-05 | 0.00224  | Genebody   |
| chr10 | 85886201  | 85887600  | Spata9   | Down | -1.02 | 3.73E-05 | 0.005096 | Genebody   |
| chr13 | 85841101  | 85843000  | Trappc9  | Down | -1.02 | 3.76E-05 | 0.005123 | Genebody   |
| chrX  | 7106601   | 7107900   | Kctd16   | Down | -1.02 | 4.09E-05 | 0.005432 | Genebody   |
| chr6  | 107391301 | 107392300 | Ccdc91   | Down | -1.02 | 0.000313 | 0.029787 | Genebody   |
| chr17 | 8248701   | 8250100   |          | Down | -1.02 | 1.81E-07 | 0.000142 | Intergenic |
| chr3  | 581201    | 582900    |          | Down | -1.02 | 5.52E-07 | 0.000272 | Intergenic |
| chr2  | 154368501 | 154370900 |          | Down | -1.02 | 6.71E-07 | 0.000301 | Intergenic |
| chr16 | 37873401  | 37876200  |          | Down | -1.02 | 8.17E-07 | 0.000339 | Intergenic |
| chrX  | 130258601 | 130261200 |          | Down | -1.02 | 1.09E-06 | 0.000409 | Intergenic |
| chr16 | 20786701  | 20788600  |          | Down | -1.02 | 1.13E-06 | 0.000419 | Intergenic |
| chr16 | 31456501  | 31457900  |          | Down | -1.02 | 1.27E-06 | 0.000455 | Intergenic |
| chr16 | 21372801  | 21375500  |          | Down | -1.02 | 1.35E-06 | 0.00047  | Intergenic |
| chr16 | 22092601  | 22094100  |          | Down | -1.02 | 3.23E-06 | 0.000844 | Intergenic |
| chr16 | 20806901  | 20808200  |          | Down | -1.02 | 7.18E-06 | 0.001517 | Intergenic |
| chr1  | 14273601  | 14274600  |          | Down | -1.02 | 1.54E-05 | 0.002695 | Intergenic |
| chr20 | 37991601  | 37992800  |          | Down | -1.02 | 2.33E-05 | 0.003627 | Intergenic |
| chr16 | 21352901  | 21354700  |          | Down | -1.02 | 2.83E-05 | 0.004169 | Intergenic |
| chr2  | 193043101 | 193044100 |          | Down | -1.02 | 3.28E-05 | 0.004639 | Intergenic |
| chrX  | 129135301 | 129136400 |          | Down | -1.02 | 3.29E-05 | 0.004639 | Intergenic |
| chr1  | 48476201  | 48477300  |          | Down | -1.02 | 3.32E-05 | 0.004662 | Intergenic |

|       |           |           |          |       |          |          |            |            |
|-------|-----------|-----------|----------|-------|----------|----------|------------|------------|
| chrX  | 53777901  | 53779000  | Down     | -1.02 | 3.60E-05 | 0.004954 | Intergenic |            |
| chr16 | 2695201   | 2696200   | Down     | -1.02 | 4.18E-05 | 0.005535 | Intergenic |            |
| chr15 | 15204501  | 15205500  | Down     | -1.02 | 5.27E-05 | 0.006485 | Intergenic |            |
| chr2  | 21684501  | 21685500  | Down     | -1.02 | 7.34E-05 | 0.008213 | Intergenic |            |
| chr2  | 29214801  | 29215800  | Down     | -1.02 | 7.87E-05 | 0.008557 | Intergenic |            |
| chr10 | 5473201   | 5474200   | Down     | -1.02 | 7.90E-05 | 0.008574 | Intergenic |            |
| chr13 | 111008401 | 111009400 | Down     | -1.02 | 8.70E-05 | 0.009185 | Intergenic |            |
| chr16 | 21575401  | 21576400  | Down     | -1.02 | 9.23E-05 | 0.009562 | Intergenic |            |
| chrX  | 128987401 | 128989100 | Down     | -1.02 | 9.96E-05 | 0.010041 | Intergenic |            |
| chr14 | 49103401  | 49104900  | Down     | -1.02 | 0.000165 | 0.016072 | Intergenic |            |
| chr5  | 148154401 | 148155400 | Tusc3    | Down  | -1.03    | 2.07E-05 | 0.003338   | 3k promote |
| chr8  | 113291701 | 113292700 | Msl3l2   | Down  | -1.03    | 6.06E-05 | 0.007151   | 3k promote |
| chr9  | 1161301   | 1162300   | Cacna2d3 | Down  | -1.03    | 5.19E-07 | 0.000262   | Genebody   |
| chr7  | 59697801  | 59698800  | Stk32b   | Down  | -1.03    | 3.97E-05 | 0.005322   | Genebody   |
| chr8  | 107319201 | 107320200 | lft80    | Down  | -1.03    | 8.75E-05 | 0.009218   | Genebody   |
| chr15 | 5566201   | 5567300   | Cyp2c7   | Down  | -1.03    | 0.000323 | 0.030702   | Genebody   |
| chr17 | 48917801  | 48919700  |          | Down  | -1.03    | 4.83E-07 | 0.000251   | Intergenic |
| chr2  | 61088201  | 61089200  |          | Down  | -1.03    | 7.90E-07 | 0.000332   | Intergenic |
| chr16 | 22068601  | 22071300  |          | Down  | -1.03    | 9.15E-07 | 0.000368   | Intergenic |
| chr1  | 14438601  | 14439900  |          | Down  | -1.03    | 1.07E-06 | 0.000404   | Intergenic |
| chr16 | 20860501  | 20861700  |          | Down  | -1.03    | 2.35E-06 | 0.000671   | Intergenic |
| chr16 | 20583801  | 20586000  |          | Down  | -1.03    | 2.44E-06 | 0.000688   | Intergenic |
| chrX  | 129085701 | 129089000 |          | Down  | -1.03    | 2.91E-06 | 0.000781   | Intergenic |
| chrX  | 129182401 | 129183400 |          | Down  | -1.03    | 4.80E-06 | 0.001123   | Intergenic |
| chr16 | 21224901  | 21226800  |          | Down  | -1.03    | 5.25E-06 | 0.001195   | Intergenic |
| chr15 | 56997001  | 56998000  |          | Down  | -1.03    | 5.82E-06 | 0.001295   | Intergenic |
| chr20 | 26223801  | 26224800  |          | Down  | -1.03    | 1.21E-05 | 0.002241   | Intergenic |
| chr1  | 48208401  | 48209700  |          | Down  | -1.03    | 1.30E-05 | 0.002347   | Intergenic |
| chr18 | 55502801  | 55503800  |          | Down  | -1.03    | 1.37E-05 | 0.002438   | Intergenic |
| chr1  | 47889501  | 47890500  |          | Down  | -1.03    | 2.01E-05 | 0.003262   | Intergenic |
| chr18 | 53298501  | 53299600  |          | Down  | -1.03    | 2.65E-05 | 0.003968   | Intergenic |
| chr11 | 70092101  | 70093100  |          | Down  | -1.03    | 2.79E-05 | 0.004114   | Intergenic |
| chr8  | 54300201  | 54301200  |          | Down  | -1.03    | 3.06E-05 | 0.004404   | Intergenic |
| chr16 | 20867401  | 20868700  |          | Down  | -1.03    | 4.52E-05 | 0.005847   | Intergenic |
| chr6  | 138972101 | 138974400 |          | Down  | -1.03    | 4.54E-05 | 0.005856   | Intergenic |
| chr11 | 5532501   | 5533500   |          | Down  | -1.03    | 4.71E-05 | 0.006016   | Intergenic |
| chr16 | 21350501  | 21351800  |          | Down  | -1.03    | 4.88E-05 | 0.006167   | Intergenic |
| chr16 | 65187401  | 65188700  |          | Down  | -1.03    | 5.20E-05 | 0.006426   | Intergenic |
| chr16 | 22063801  | 22064800  |          | Down  | -1.03    | 5.41E-05 | 0.006614   | Intergenic |
| chr19 | 56748701  | 56749800  |          | Down  | -1.03    | 6.06E-05 | 0.007151   | Intergenic |
| chr7  | 23970101  | 23972000  |          | Down  | -1.03    | 7.02E-05 | 0.007949   | Intergenic |
| chr20 | 20719001  | 20720000  |          | Down  | -1.03    | 7.36E-05 | 0.008224   | Intergenic |
| chr4  | 86168701  | 86169700  |          | Down  | -1.03    | 7.41E-05 | 0.008249   | Intergenic |
| chr6  | 138856001 | 138857200 |          | Down  | -1.03    | 8.22E-05 | 0.008871   | Intergenic |
| chr16 | 20662501  | 20663500  |          | Down  | -1.03    | 8.67E-05 | 0.009183   | Intergenic |
| chr15 | 301       | 1300      |          | Down  | -1.03    | 8.68E-05 | 0.009183   | Intergenic |
| chr20 | 23427001  | 23428000  |          | Down  | -1.03    | 9.98E-05 | 0.010051   | Intergenic |
| chr20 | 38164601  | 38166000  |          | Down  | -1.03    | 0.000263 | 0.025216   | Intergenic |

|       |           |           |           |      |       |          |          |            |
|-------|-----------|-----------|-----------|------|-------|----------|----------|------------|
| chr6  | 139854501 | 139855600 |           | Down | -1.03 | 0.000276 | 0.026487 | Intergenic |
| chr1  | 52846501  | 52848000  |           | Down | -1.03 | 0.000476 | 0.044999 | Intergenic |
| chr16 | 56930201  | 56931600  | Casp8     | Down | -1.04 | 2.28E-05 | 0.003588 | 3k promote |
| chr1  | 243998701 | 243999700 | Ccdc47    | Down | -1.04 | 4.57E-05 | 0.005884 | Genebody   |
| chr1  | 52799801  | 52800900  |           | Down | -1.04 | 2.97E-07 | 0.000194 | Intergenic |
| chr6  | 139341501 | 139343200 |           | Down | -1.04 | 7.04E-07 | 0.000309 | Intergenic |
| chr16 | 20755901  | 20757600  |           | Down | -1.04 | 7.25E-07 | 0.000313 | Intergenic |
| chr16 | 20451301  | 20452700  |           | Down | -1.04 | 9.23E-07 | 0.00037  | Intergenic |
| chr1  | 51345701  | 51347600  |           | Down | -1.04 | 1.33E-06 | 0.000465 | Intergenic |
| chr16 | 20850501  | 20851500  |           | Down | -1.04 | 1.42E-06 | 0.000483 | Intergenic |
| chr9  | 16615401  | 16616700  |           | Down | -1.04 | 1.83E-06 | 0.000571 | Intergenic |
| chr4  | 57761301  | 57762600  |           | Down | -1.04 | 3.89E-06 | 0.000963 | Intergenic |
| chr4  | 57834701  | 57836000  |           | Down | -1.04 | 4.24E-06 | 0.001029 | Intergenic |
| chrX  | 15317701  | 15319600  |           | Down | -1.04 | 9.74E-06 | 0.001928 | Intergenic |
| chr7  | 136901601 | 136903000 |           | Down | -1.04 | 1.10E-05 | 0.002099 | Intergenic |
| chr4  | 127957401 | 127958500 |           | Down | -1.04 | 1.18E-05 | 0.002203 | Intergenic |
| chr1  | 128809401 | 128810400 |           | Down | -1.04 | 1.27E-05 | 0.002328 | Intergenic |
| chr6  | 139760001 | 139763600 |           | Down | -1.04 | 1.28E-05 | 0.002333 | Intergenic |
| chr16 | 21518801  | 21520100  |           | Down | -1.04 | 1.52E-05 | 0.002653 | Intergenic |
| chr1  | 51644601  | 51645900  |           | Down | -1.04 | 1.83E-05 | 0.003054 | Intergenic |
| chr5  | 170726401 | 170727400 |           | Down | -1.04 | 1.90E-05 | 0.003123 | Intergenic |
| chr3  | 57267901  | 57269000  |           | Down | -1.04 | 2.48E-05 | 0.003795 | Intergenic |
| chr19 | 23202601  | 23203800  |           | Down | -1.04 | 2.54E-05 | 0.003847 | Intergenic |
| chr4  | 17214701  | 17217100  |           | Down | -1.04 | 2.71E-05 | 0.004037 | Intergenic |
| chr6  | 139316401 | 139317400 |           | Down | -1.04 | 3.20E-05 | 0.004541 | Intergenic |
| chr1  | 99559101  | 99560100  |           | Down | -1.04 | 3.26E-05 | 0.004611 | Intergenic |
| chr18 | 17649601  | 17651200  |           | Down | -1.04 | 3.53E-05 | 0.004892 | Intergenic |
| chrX  | 114148801 | 114149800 |           | Down | -1.04 | 4.83E-05 | 0.006121 | Intergenic |
| chr6  | 11956101  | 11957100  |           | Down | -1.04 | 4.92E-05 | 0.006199 | Intergenic |
| chrX  | 130261401 | 130263500 |           | Down | -1.04 | 7.30E-05 | 0.008188 | Intergenic |
| chr4  | 167499301 | 167500700 |           | Down | -1.04 | 7.52E-05 | 0.008311 | Intergenic |
| chr8  | 59005201  | 59006200  |           | Down | -1.04 | 8.08E-05 | 0.008739 | Intergenic |
| chr4  | 164905201 | 164906200 |           | Down | -1.04 | 8.35E-05 | 0.008958 | Intergenic |
| chr16 | 21264801  | 21265800  |           | Down | -1.04 | 8.88E-05 | 0.009311 | Intergenic |
| chr17 | 77882501  | 77883500  |           | Down | -1.04 | 9.45E-05 | 0.009697 | Intergenic |
| chr18 | 876801    | 877800    |           | Down | -1.04 | 9.88E-05 | 0.009986 | Intergenic |
| chr6  | 89224501  | 89225600  |           | Down | -1.04 | 0.000284 | 0.027131 | Intergenic |
| chr4  | 185233201 | 185235100 | Zscan21   | Down | -1.05 | 4.07E-05 | 0.005425 | Genebody   |
| chr11 | 82751901  | 82753400  | Spetex-2B | Down | -1.05 | 0.000198 | 0.019153 | Genebody   |
| chr7  | 142847101 | 142849000 |           | Down | -1.05 | 1.35E-06 | 0.00047  | Intergenic |
| chr1  | 45742901  | 45743900  |           | Down | -1.05 | 1.57E-06 | 0.000521 | Intergenic |
| chr6  | 139444901 | 139448400 |           | Down | -1.05 | 1.76E-06 | 0.000563 | Intergenic |
| chr2  | 694501    | 695900    |           | Down | -1.05 | 1.91E-06 | 0.000586 | Intergenic |
| chrX  | 130329601 | 130332000 |           | Down | -1.05 | 2.90E-06 | 0.000781 | Intergenic |
| chr17 | 52638501  | 52639600  |           | Down | -1.05 | 3.44E-06 | 0.000887 | Intergenic |
| chrX  | 128991201 | 128993300 |           | Down | -1.05 | 3.77E-06 | 0.000943 | Intergenic |
| chr4  | 26920501  | 26921600  |           | Down | -1.05 | 4.69E-06 | 0.001107 | Intergenic |
| chr10 | 7243001   | 7244000   |           | Down | -1.05 | 6.15E-06 | 0.001347 | Intergenic |

|       |           |           |          |       |          |          |            |          |
|-------|-----------|-----------|----------|-------|----------|----------|------------|----------|
| chr1  | 111270801 | 111271800 | Down     | -1.05 | 8.63E-06 | 0.001749 | Intergenic |          |
| chr10 | 96436101  | 96437100  | Down     | -1.05 | 1.02E-05 | 0.001999 | Intergenic |          |
| chr13 | 30623701  | 30624700  | Down     | -1.05 | 1.37E-05 | 0.002445 | Intergenic |          |
| chr6  | 139439701 | 139441500 | Down     | -1.05 | 1.49E-05 | 0.002623 | Intergenic |          |
| chr16 | 21263401  | 21264700  | Down     | -1.05 | 1.68E-05 | 0.002862 | Intergenic |          |
| chr15 | 23309701  | 23311100  | Down     | -1.05 | 1.71E-05 | 0.002899 | Intergenic |          |
| chr13 | 67770501  | 67771600  | Down     | -1.05 | 2.29E-05 | 0.003601 | Intergenic |          |
| chr3  | 16900401  | 16901400  | Down     | -1.05 | 2.47E-05 | 0.003789 | Intergenic |          |
| chr18 | 20106801  | 20108100  | Down     | -1.05 | 2.74E-05 | 0.004067 | Intergenic |          |
| chr8  | 39900301  | 39901300  | Down     | -1.05 | 3.72E-05 | 0.005086 | Intergenic |          |
| chrX  | 129104601 | 129105600 | Down     | -1.05 | 5.11E-05 | 0.006354 | Intergenic |          |
| chr5  | 136172601 | 136173700 | Down     | -1.05 | 5.47E-05 | 0.006682 | Intergenic |          |
| chr16 | 20746301  | 20749200  | Down     | -1.05 | 6.03E-05 | 0.007139 | Intergenic |          |
| chr17 | 49597501  | 49598600  | Down     | -1.05 | 6.84E-05 | 0.007814 | Intergenic |          |
| chrX  | 129488401 | 129492200 | Down     | -1.05 | 7.18E-05 | 0.008085 | Intergenic |          |
| chr17 | 96405501  | 96407400  | Down     | -1.05 | 8.12E-05 | 0.008773 | Intergenic |          |
| chrX  | 103086701 | 103087700 | Down     | -1.05 | 8.25E-05 | 0.008887 | Intergenic |          |
| chr9  | 1846101   | 1847100   | Down     | -1.05 | 8.54E-05 | 0.009091 | Intergenic |          |
| chr20 | 38563801  | 38564800  | Down     | -1.05 | 9.47E-05 | 0.009711 | Intergenic |          |
| chr1  | 50856401  | 50857700  | Down     | -1.05 | 0.000105 | 0.010495 | Intergenic |          |
| chrX  | 129477701 | 129478900 | Down     | -1.05 | 0.000124 | 0.012302 | Intergenic |          |
| chr2  | 177100401 | 177102100 | Down     | -1.05 | 0.00019  | 0.018432 | Intergenic |          |
| chr16 | 27669101  | 27670200  | Down     | -1.05 | 0.000205 | 0.019825 | Intergenic |          |
| chr16 | 20774001  | 20775200  | Down     | -1.05 | 0.000207 | 0.020023 | Intergenic |          |
| chr6  | 139362201 | 139363500 | Down     | -1.05 | 0.00045  | 0.042595 | Intergenic |          |
| chr9  | 1084701   | 1085700   | Ddr2     | Down  | -1.06    | 1.86E-06 | 0.000575   | Genebody |
| chr5  | 149582801 | 149584300 | LOC68138 | Down  | -1.06    | 2.12E-05 | 0.003407   | Genebody |
| chr15 | 5096901   | 5097900   | LOC30030 | Down  | -1.06    | 3.00E-05 | 0.004331   | Genebody |
| chr17 | 57966201  | 57968100  | Down     | -1.06 | 4.16E-07 | 0.000232 | Intergenic |          |
| chr16 | 21485301  | 21488600  | Down     | -1.06 | 9.73E-07 | 0.000383 | Intergenic |          |
| chrX  | 130467701 | 130471700 | Down     | -1.06 | 1.31E-06 | 0.000461 | Intergenic |          |
| chr2  | 154372101 | 154373700 | Down     | -1.06 | 1.60E-06 | 0.000527 | Intergenic |          |
| chr16 | 21161301  | 21166800  | Down     | -1.06 | 2.03E-06 | 0.00061  | Intergenic |          |
| chr15 | 87016101  | 87017600  | Down     | -1.06 | 2.06E-06 | 0.000618 | Intergenic |          |
| chr15 | 27951001  | 27952200  | Down     | -1.06 | 2.62E-06 | 0.000722 | Intergenic |          |
| chr7  | 18794301  | 18795500  | Down     | -1.06 | 2.82E-06 | 0.000763 | Intergenic |          |
| chr9  | 8076101   | 8078500   | Down     | -1.06 | 2.89E-06 | 0.00078  | Intergenic |          |
| chr6  | 139083301 | 139085100 | Down     | -1.06 | 2.91E-06 | 0.000781 | Intergenic |          |
| chr4  | 57811901  | 57813400  | Down     | -1.06 | 3.30E-06 | 0.000859 | Intergenic |          |
| chr7  | 210301    | 211400    | Down     | -1.06 | 4.21E-06 | 0.001022 | Intergenic |          |
| chr13 | 28214501  | 28216300  | Down     | -1.06 | 4.81E-06 | 0.001123 | Intergenic |          |
| chr16 | 21398601  | 21399600  | Down     | -1.06 | 1.07E-05 | 0.002058 | Intergenic |          |
| chr2  | 177601    | 179700    | Down     | -1.06 | 2.43E-05 | 0.003755 | Intergenic |          |
| chr16 | 21245701  | 21246700  | Down     | -1.06 | 3.14E-05 | 0.004483 | Intergenic |          |
| chr16 | 27211201  | 27212200  | Down     | -1.06 | 3.17E-05 | 0.004508 | Intergenic |          |
| chr16 | 85932501  | 85933900  | Down     | -1.06 | 3.78E-05 | 0.005132 | Intergenic |          |
| chr8  | 107923901 | 107925000 | Down     | -1.06 | 3.80E-05 | 0.005159 | Intergenic |          |
| chr11 | 84494601  | 84495600  | Down     | -1.06 | 4.79E-05 | 0.006087 | Intergenic |          |



|       |           |           |           |      |       |          |          |            |
|-------|-----------|-----------|-----------|------|-------|----------|----------|------------|
| chr1  | 51391701  | 51392700  |           | Down | -1.06 | 5.78E-05 | 0.006944 | Intergenic |
| chr16 | 21282201  | 21283200  |           | Down | -1.06 | 6.61E-05 | 0.007635 | Intergenic |
| chr1  | 51432001  | 51433000  |           | Down | -1.06 | 9.25E-05 | 0.00957  | Intergenic |
| chr2  | 181920001 | 181921900 |           | Down | -1.06 | 0.000132 | 0.013011 | Intergenic |
| chr19 | 24108501  | 24109600  |           | Down | -1.06 | 0.000156 | 0.015309 | Intergenic |
| chr10 | 56729401  | 56730400  | Dpf3      | Down | -1.07 | 1.51E-05 | 0.002641 | Genebody   |
| chr11 | 34951501  | 34952500  | Sult1c2a  | Down | -1.07 | 3.70E-05 | 0.005079 | Genebody   |
| chr11 | 82735301  | 82736300  | Hmga2     | Down | -1.07 | 8.85E-05 | 0.00929  | Genebody   |
| chr6  | 139028901 | 139031300 |           | Down | -1.07 | 1.06E-06 | 0.000403 | Intergenic |
| chr6  | 139814201 | 139817900 |           | Down | -1.07 | 1.99E-06 | 0.000601 | Intergenic |
| chr16 | 31165401  | 31166700  |           | Down | -1.07 | 2.10E-06 | 0.000624 | Intergenic |
| chr16 | 20453301  | 20455300  |           | Down | -1.07 | 2.19E-06 | 0.000642 | Intergenic |
| chr7  | 677501    | 681000    |           | Down | -1.07 | 4.13E-06 | 0.001006 | Intergenic |
| chr20 | 36942801  | 36944100  |           | Down | -1.07 | 4.16E-06 | 0.001014 | Intergenic |
| chrX  | 130279701 | 130284000 |           | Down | -1.07 | 4.97E-06 | 0.001146 | Intergenic |
| chr1  | 112609901 | 112611200 |           | Down | -1.07 | 1.03E-05 | 0.002004 | Intergenic |
| chr13 | 30624901  | 30626100  |           | Down | -1.07 | 1.32E-05 | 0.002377 | Intergenic |
| chr16 | 31144701  | 31146500  |           | Down | -1.07 | 1.66E-05 | 0.002841 | Intergenic |
| chr2  | 30945201  | 30946200  |           | Down | -1.07 | 3.43E-05 | 0.004789 | Intergenic |
| chr13 | 19117801  | 19119200  |           | Down | -1.07 | 3.47E-05 | 0.004826 | Intergenic |
| chr3  | 138147601 | 138148600 |           | Down | -1.07 | 3.57E-05 | 0.004923 | Intergenic |
| chr4  | 161214101 | 161215200 |           | Down | -1.07 | 3.59E-05 | 0.004946 | Intergenic |
| chr10 | 66037801  | 66038800  |           | Down | -1.07 | 5.04E-05 | 0.006287 | Intergenic |
| chr1  | 37018001  | 37019000  |           | Down | -1.07 | 5.53E-05 | 0.006733 | Intergenic |
| chr7  | 18707501  | 18708500  |           | Down | -1.07 | 5.97E-05 | 0.007093 | Intergenic |
| chrX  | 130055301 | 130056300 |           | Down | -1.07 | 6.01E-05 | 0.007123 | Intergenic |
| chr20 | 13710501  | 13711500  |           | Down | -1.07 | 7.67E-05 | 0.008422 | Intergenic |
| chr1  | 232805001 | 232806000 |           | Down | -1.07 | 9.23E-05 | 0.009562 | Intergenic |
| chr18 | 21620901  | 21622000  |           | Down | -1.07 | 0.00014  | 0.01376  | Intergenic |
| chr13 | 69172201  | 69173300  |           | Down | -1.07 | 0.000185 | 0.018008 | Intergenic |
| chr17 | 3884601   | 3886500   |           | Down | -1.07 | 0.000205 | 0.019859 | Intergenic |
| chr1  | 34475501  | 34476700  |           | Down | -1.07 | 0.000306 | 0.029129 | Intergenic |
| chr20 | 34901101  | 34902200  | Skap2     | Down | -1.08 | 1.32E-05 | 0.00238  | 3k promote |
| chr10 | 57869801  | 57870800  | Ephb1     | Down | -1.08 | 6.71E-06 | 0.001445 | Genebody   |
| chr16 | 4934001   | 4935500   | Spetex-2D | Down | -1.08 | 2.60E-05 | 0.003905 | Genebody   |
| chr14 | 7808901   | 7810100   | Cyp2c7    | Down | -1.08 | 9.43E-05 | 0.009684 | Genebody   |
| chr1  | 50962701  | 50964900  |           | Down | -1.08 | 1.42E-07 | 0.000119 | Intergenic |
| chr1  | 50166701  | 50168400  |           | Down | -1.08 | 3.59E-07 | 0.000214 | Intergenic |
| chr2  | 1277001   | 1278800   |           | Down | -1.08 | 3.93E-07 | 0.000226 | Intergenic |
| chr16 | 37886701  | 37890900  |           | Down | -1.08 | 8.52E-07 | 0.000349 | Intergenic |
| chr6  | 139818201 | 139820000 |           | Down | -1.08 | 1.09E-06 | 0.00041  | Intergenic |
| chr16 | 21460001  | 21462500  |           | Down | -1.08 | 1.10E-06 | 0.000412 | Intergenic |
| chr6  | 139793001 | 139796900 |           | Down | -1.08 | 1.11E-06 | 0.000413 | Intergenic |
| chr16 | 21138601  | 21140900  |           | Down | -1.08 | 1.28E-06 | 0.000456 | Intergenic |
| chr16 | 21627901  | 21631200  |           | Down | -1.08 | 1.57E-06 | 0.000521 | Intergenic |
| chr1  | 51403801  | 51405600  |           | Down | -1.08 | 1.76E-06 | 0.000563 | Intergenic |
| chr6  | 139531901 | 139534300 |           | Down | -1.08 | 3.62E-06 | 0.00092  | Intergenic |
| chr4  | 57750801  | 57752300  |           | Down | -1.08 | 3.74E-06 | 0.000939 | Intergenic |

|       |           |           |          |      |       |          |          |            |
|-------|-----------|-----------|----------|------|-------|----------|----------|------------|
| chr17 | 49606401  | 49607600  |          | Down | -1.08 | 4.82E-06 | 0.001123 | Intergenic |
| chrX  | 130232401 | 130235100 |          | Down | -1.08 | 6.27E-06 | 0.001366 | Intergenic |
| chr16 | 31129001  | 31130200  |          | Down | -1.08 | 8.09E-06 | 0.001665 | Intergenic |
| chr6  | 139334601 | 139336500 |          | Down | -1.08 | 1.87E-05 | 0.003091 | Intergenic |
| chr1  | 51409501  | 51410500  |          | Down | -1.08 | 1.98E-05 | 0.00322  | Intergenic |
| chr16 | 68715601  | 68716600  |          | Down | -1.08 | 2.18E-05 | 0.003469 | Intergenic |
| chr16 | 22104201  | 22105900  |          | Down | -1.08 | 2.96E-05 | 0.004305 | Intergenic |
| chr1  | 47862901  | 47864000  |          | Down | -1.08 | 3.15E-05 | 0.004499 | Intergenic |
| chr1  | 52363601  | 52364800  |          | Down | -1.08 | 3.20E-05 | 0.004541 | Intergenic |
| chr1  | 26990501  | 26991500  |          | Down | -1.08 | 3.75E-05 | 0.005112 | Intergenic |
| chrX  | 130293001 | 130294600 |          | Down | -1.08 | 4.39E-05 | 0.005733 | Intergenic |
| chr13 | 109221301 | 109222700 |          | Down | -1.08 | 4.54E-05 | 0.005858 | Intergenic |
| chr2  | 197401    | 198400    |          | Down | -1.08 | 5.43E-05 | 0.006635 | Intergenic |
| chr17 | 49583701  | 49585400  |          | Down | -1.08 | 6.02E-05 | 0.007128 | Intergenic |
| chr15 | 83452401  | 83453400  |          | Down | -1.08 | 6.45E-05 | 0.007497 | Intergenic |
| chr4  | 186217801 | 186219200 |          | Down | -1.08 | 0.000137 | 0.013501 | Intergenic |
| chr3  | 98208501  | 98209700  | Ptprc    | Down | -1.09 | 2.96E-06 | 0.000792 | Genebody   |
| chr1  | 243960901 | 243961900 | Sult1c2a | Down | -1.09 | 4.56E-05 | 0.005878 | Genebody   |
| chr1  | 251769801 | 251770800 | Ube2d1   | Down | -1.09 | 0.000486 | 0.04591  | Genebody   |
| chr16 | 20907101  | 20908400  |          | Down | -1.09 | 3.65E-07 | 0.000215 | Intergenic |
| chr20 | 279501    | 281400    |          | Down | -1.09 | 5.26E-07 | 0.000265 | Intergenic |
| chr6  | 138930001 | 138931400 |          | Down | -1.09 | 6.42E-07 | 0.000293 | Intergenic |
| chr6  | 139481101 | 139483300 |          | Down | -1.09 | 1.20E-06 | 0.000439 | Intergenic |
| chrX  | 129362001 | 129363400 |          | Down | -1.09 | 1.23E-06 | 0.000446 | Intergenic |
| chr6  | 139310101 | 139311200 |          | Down | -1.09 | 1.88E-06 | 0.000578 | Intergenic |
| chr16 | 21438501  | 21441300  |          | Down | -1.09 | 2.06E-06 | 0.000618 | Intergenic |
| chr15 | 99255101  | 99257000  |          | Down | -1.09 | 3.16E-06 | 0.000832 | Intergenic |
| chr5  | 123713901 | 123715400 |          | Down | -1.09 | 4.54E-06 | 0.00108  | Intergenic |
| chr6  | 122484901 | 122486400 |          | Down | -1.09 | 5.10E-06 | 0.001171 | Intergenic |
| chrX  | 128908701 | 128912900 |          | Down | -1.09 | 5.10E-06 | 0.001171 | Intergenic |
| chrX  | 129492401 | 129494600 |          | Down | -1.09 | 5.21E-06 | 0.001191 | Intergenic |
| chr19 | 8796001   | 8797800   |          | Down | -1.09 | 9.65E-06 | 0.001916 | Intergenic |
| chr14 | 96512701  | 96514600  |          | Down | -1.09 | 1.11E-05 | 0.002115 | Intergenic |
| chr1  | 104880301 | 104881500 |          | Down | -1.09 | 1.14E-05 | 0.002148 | Intergenic |
| chr13 | 96545101  | 96546200  |          | Down | -1.09 | 1.40E-05 | 0.002491 | Intergenic |
| chr17 | 49629001  | 49630000  |          | Down | -1.09 | 1.92E-05 | 0.003137 | Intergenic |
| chrX  | 128943901 | 128946100 |          | Down | -1.09 | 1.92E-05 | 0.003137 | Intergenic |
| chrX  | 129774001 | 129775000 |          | Down | -1.09 | 3.40E-05 | 0.004757 | Intergenic |
| chr20 | 11103601  | 11104600  |          | Down | -1.09 | 3.89E-05 | 0.005249 | Intergenic |
| chr1  | 51632101  | 51633100  |          | Down | -1.09 | 3.95E-05 | 0.005304 | Intergenic |
| chr2  | 1285001   | 1286200   |          | Down | -1.09 | 4.48E-05 | 0.00582  | Intergenic |
| chrX  | 107352201 | 107353200 |          | Down | -1.09 | 6.41E-05 | 0.007471 | Intergenic |
| chr1  | 242103101 | 242104100 |          | Down | -1.09 | 7.63E-05 | 0.008399 | Intergenic |
| chr16 | 27826501  | 27827500  |          | Down | -1.09 | 9.23E-05 | 0.009563 | Intergenic |
| chrX  | 129782501 | 129783900 |          | Down | -1.09 | 0.000127 | 0.012516 | Intergenic |
| chr2  | 1113201   | 1114300   |          | Down | -1.09 | 0.000148 | 0.01451  | Intergenic |
| chr1  | 51482601  | 51483700  |          | Down | -1.09 | 0.000496 | 0.046804 | Intergenic |
| chr1  | 170283701 | 170285600 | Rtkn2    | Down | -1.1  | 3.57E-06 | 0.000909 | Genebody   |

|       |           |           |           |      |       |          |          |            |
|-------|-----------|-----------|-----------|------|-------|----------|----------|------------|
| chr11 | 83251601  | 83253500  | Spetex-2H | Down | -1.1  | 6.34E-05 | 0.007408 | Genebody   |
| chr3  | 89810001  | 89811000  | Acap1     | Down | -1.1  | 7.22E-05 | 0.008115 | Genebody   |
| chr9  | 73267101  | 73268300  | Xpr1      | Down | -1.1  | 0.000164 | 0.015996 | Genebody   |
| chr6  | 139079801 | 139081400 |           | Down | -1.1  | 3.48E-07 | 0.000212 | Intergenic |
| chr16 | 22099101  | 22101500  |           | Down | -1.1  | 4.35E-07 | 0.000239 | Intergenic |
| chr16 | 30943701  | 30945800  |           | Down | -1.1  | 4.89E-07 | 0.000253 | Intergenic |
| chr1  | 175421601 | 175422900 |           | Down | -1.1  | 5.49E-07 | 0.000272 | Intergenic |
| chrX  | 128895601 | 128898000 |           | Down | -1.1  | 1.44E-06 | 0.00049  | Intergenic |
| chr2  | 186001    | 188700    |           | Down | -1.1  | 1.54E-06 | 0.000515 | Intergenic |
| chr17 | 49571401  | 49574600  |           | Down | -1.1  | 1.77E-06 | 0.000564 | Intergenic |
| chr6  | 103972401 | 103973800 |           | Down | -1.1  | 1.94E-06 | 0.000591 | Intergenic |
| chrX  | 129151101 | 129153300 |           | Down | -1.1  | 2.70E-06 | 0.000739 | Intergenic |
| chr15 | 4763001   | 4764000   |           | Down | -1.1  | 4.31E-06 | 0.001037 | Intergenic |
| chrX  | 130286101 | 130288800 |           | Down | -1.1  | 5.07E-06 | 0.001166 | Intergenic |
| chr10 | 12340501  | 12341500  |           | Down | -1.1  | 1.36E-05 | 0.002425 | Intergenic |
| chrX  | 130289101 | 130292200 |           | Down | -1.1  | 1.89E-05 | 0.003109 | Intergenic |
| chr6  | 138911901 | 138913400 |           | Down | -1.1  | 3.49E-05 | 0.004854 | Intergenic |
| chr1  | 51303101  | 51304300  |           | Down | -1.1  | 4.41E-05 | 0.005746 | Intergenic |
| chrX  | 129123201 | 129124200 |           | Down | -1.1  | 4.49E-05 | 0.005822 | Intergenic |
| chr2  | 52764501  | 52765500  |           | Down | -1.1  | 4.53E-05 | 0.00585  | Intergenic |
| chr8  | 42098901  | 42099900  |           | Down | -1.1  | 4.75E-05 | 0.006053 | Intergenic |
| chrX  | 129062201 | 129063200 |           | Down | -1.1  | 5.53E-05 | 0.006733 | Intergenic |
| chr1  | 199097501 | 199098500 |           | Down | -1.1  | 5.83E-05 | 0.006977 | Intergenic |
| chr14 | 96482301  | 96483300  |           | Down | -1.1  | 6.21E-05 | 0.007298 | Intergenic |
| chr16 | 21993701  | 21995300  |           | Down | -1.1  | 6.25E-05 | 0.007335 | Intergenic |
| chr6  | 140045301 | 140046300 |           | Down | -1.1  | 6.96E-05 | 0.007904 | Intergenic |
| chr20 | 36965701  | 36966700  |           | Down | -1.1  | 7.85E-05 | 0.008543 | Intergenic |
| chrX  | 130276801 | 130279100 |           | Down | -1.1  | 8.66E-05 | 0.009178 | Intergenic |
| chr16 | 21089801  | 21091100  |           | Down | -1.1  | 8.87E-05 | 0.009303 | Intergenic |
| chr10 | 2317801   | 2318800   |           | Down | -1.1  | 9.05E-05 | 0.00945  | Intergenic |
| chr9  | 57386801  | 57387800  | Apba1     | Down | -1.11 | 2.15E-05 | 0.003433 | 3k promote |
| chr8  | 66064301  | 66065400  | Ywhae     | Down | -1.11 | 1.25E-05 | 0.002289 | Genebody   |
| chr7  | 75005801  | 75006800  | Dyrk1a    | Down | -1.11 | 1.28E-05 | 0.002337 | Genebody   |
| chr20 | 29228501  | 29229600  | Ramp1     | Down | -1.11 | 1.31E-05 | 0.002368 | Genebody   |
| chr14 | 90107501  | 90108500  | Trafd1    | Down | -1.11 | 2.84E-05 | 0.004175 | Genebody   |
| chr14 | 36043501  | 36044500  | Abcc5     | Down | -1.11 | 7.03E-05 | 0.007956 | Genebody   |
| chr9  | 43256401  | 43257900  | Nup88     | Down | -1.11 | 8.35E-05 | 0.008958 | Genebody   |
| chr14 | 87168501  | 87169500  | Tns1      | Down | -1.11 | 0.00018  | 0.017542 | Genebody   |
| chr16 | 21241601  | 21243500  |           | Down | -1.11 | 2.51E-07 | 0.000175 | Intergenic |
| chr5  | 7052601   | 7054500   |           | Down | -1.11 | 6.39E-07 | 0.000293 | Intergenic |
| chrX  | 129310101 | 129314600 |           | Down | -1.11 | 1.29E-06 | 0.000456 | Intergenic |
| chr13 | 10880401  | 10881500  |           | Down | -1.11 | 1.86E-06 | 0.000575 | Intergenic |
| chr17 | 49563101  | 49566500  |           | Down | -1.11 | 2.22E-06 | 0.000648 | Intergenic |
| chr1  | 92207101  | 92208100  |           | Down | -1.11 | 3.68E-06 | 0.000932 | Intergenic |
| chr1  | 243641201 | 243643700 |           | Down | -1.11 | 5.63E-06 | 0.001261 | Intergenic |
| chr16 | 34050601  | 34052500  |           | Down | -1.11 | 6.28E-06 | 0.001368 | Intergenic |
| chrX  | 129648101 | 129649300 |           | Down | -1.11 | 7.34E-06 | 0.001539 | Intergenic |
| chrX  | 129871501 | 129873300 |           | Down | -1.11 | 8.35E-06 | 0.001704 | Intergenic |

|       |           |           |        |       |          |          |            |          |
|-------|-----------|-----------|--------|-------|----------|----------|------------|----------|
| chr16 | 22045701  | 22046900  | Down   | -1.11 | 8.57E-06 | 0.001741 | Intergenic |          |
| chr16 | 20652901  | 20653900  | Down   | -1.11 | 1.00E-05 | 0.00197  | Intergenic |          |
| chr14 | 49523901  | 49525700  | Down   | -1.11 | 1.26E-05 | 0.002302 | Intergenic |          |
| chr6  | 139273301 | 139274900 | Down   | -1.11 | 1.39E-05 | 0.002477 | Intergenic |          |
| chrX  | 129827701 | 129828800 | Down   | -1.11 | 1.76E-05 | 0.002956 | Intergenic |          |
| chr10 | 396701    | 397700    | Down   | -1.11 | 2.40E-05 | 0.003728 | Intergenic |          |
| chr9  | 21863601  | 21864600  | Down   | -1.11 | 3.15E-05 | 0.004498 | Intergenic |          |
| chr7  | 121413101 | 121414100 | Down   | -1.11 | 3.27E-05 | 0.004635 | Intergenic |          |
| chrX  | 130311601 | 130314800 | Down   | -1.11 | 4.39E-05 | 0.005726 | Intergenic |          |
| chr16 | 21355001  | 21356700  | Down   | -1.11 | 4.60E-05 | 0.005908 | Intergenic |          |
| chr16 | 20828801  | 20831200  | Down   | -1.11 | 5.39E-05 | 0.006598 | Intergenic |          |
| chr1  | 48307901  | 48309000  | Down   | -1.11 | 5.63E-05 | 0.006808 | Intergenic |          |
| chr7  | 17406901  | 17407900  | Down   | -1.11 | 6.26E-05 | 0.007337 | Intergenic |          |
| chr10 | 3292301   | 3294200   | Down   | -1.11 | 7.21E-05 | 0.00811  | Intergenic |          |
| chr6  | 131636001 | 131637000 | Down   | -1.11 | 9.36E-05 | 0.009624 | Intergenic |          |
| chr14 | 48771601  | 48772600  | Down   | -1.11 | 9.54E-05 | 0.009743 | Intergenic |          |
| chr1  | 123000301 | 123001400 | Down   | -1.11 | 0.000101 | 0.010188 | Intergenic |          |
| chr5  | 7212801   | 7214400   | Down   | -1.11 | 0.000279 | 0.02667  | Intergenic |          |
| chr1  | 74944201  | 74945200  | Kif23  | Down  | -1.12    | 6.38E-06 | 0.001388   | Genebody |
| chr13 | 70253301  | 70254300  | Cyp2c7 | Down  | -1.12    | 3.92E-05 | 0.005273   | Genebody |
| chr12 | 35160901  | 35161900  | Arl3   | Down  | -1.12    | 9.44E-05 | 0.009692   | Genebody |
| chr6  | 139521001 | 139522800 | Down   | -1.12 | 4.13E-07 | 0.000232 | Intergenic |          |
| chr1  | 75521901  | 75523800  | Down   | -1.12 | 5.46E-07 | 0.000272 | Intergenic |          |
| chr6  | 138926201 | 138927200 | Down   | -1.12 | 6.64E-07 | 0.000299 | Intergenic |          |
| chr16 | 20626801  | 20629600  | Down   | -1.12 | 1.40E-06 | 0.000481 | Intergenic |          |
| chr2  | 52043801  | 52045300  | Down   | -1.12 | 1.42E-06 | 0.000483 | Intergenic |          |
| chr16 | 21280601  | 21281800  | Down   | -1.12 | 1.46E-06 | 0.000494 | Intergenic |          |
| chrX  | 128864301 | 128866200 | Down   | -1.12 | 1.84E-06 | 0.000571 | Intergenic |          |
| chr2  | 209524101 | 209526000 | Down   | -1.12 | 2.52E-06 | 0.000705 | Intergenic |          |
| chr2  | 1290601   | 1291900   | Down   | -1.12 | 2.81E-06 | 0.000763 | Intergenic |          |
| chr6  | 124706801 | 124708700 | Down   | -1.12 | 3.55E-06 | 0.000906 | Intergenic |          |
| chr10 | 51161601  | 51162600  | Down   | -1.12 | 5.39E-06 | 0.001218 | Intergenic |          |
| chr17 | 49602501  | 49605700  | Down   | -1.12 | 5.50E-06 | 0.001236 | Intergenic |          |
| chr10 | 392701    | 393700    | Down   | -1.12 | 6.18E-06 | 0.00135  | Intergenic |          |
| chr10 | 34148001  | 34149100  | Down   | -1.12 | 6.73E-06 | 0.001448 | Intergenic |          |
| chr2  | 154304401 | 154305800 | Down   | -1.12 | 7.18E-06 | 0.001517 | Intergenic |          |
| chr2  | 558801    | 561900    | Down   | -1.12 | 9.15E-06 | 0.001837 | Intergenic |          |
| chr10 | 83464001  | 83465400  | Down   | -1.12 | 1.09E-05 | 0.002089 | Intergenic |          |
| chr2  | 183501501 | 183505100 | Down   | -1.12 | 1.49E-05 | 0.002618 | Intergenic |          |
| chr18 | 38831701  | 38835100  | Down   | -1.12 | 1.96E-05 | 0.003192 | Intergenic |          |
| chr13 | 95447801  | 95449300  | Down   | -1.12 | 2.24E-05 | 0.003545 | Intergenic |          |
| chr10 | 99666001  | 99667100  | Down   | -1.12 | 2.97E-05 | 0.004317 | Intergenic |          |
| chr14 | 49704301  | 49705500  | Down   | -1.12 | 2.99E-05 | 0.004331 | Intergenic |          |
| chr14 | 49275901  | 49276900  | Down   | -1.12 | 3.36E-05 | 0.004706 | Intergenic |          |
| chr18 | 4137801   | 4138800   | Down   | -1.12 | 3.93E-05 | 0.005288 | Intergenic |          |
| chr4  | 139441801 | 139442800 | Down   | -1.12 | 3.99E-05 | 0.005336 | Intergenic |          |
| chr1  | 103221401 | 103222400 | Down   | -1.12 | 5.61E-05 | 0.006803 | Intergenic |          |
| chr15 | 13792001  | 13793900  | Down   | -1.12 | 6.74E-05 | 0.007742 | Intergenic |          |

|       |           |           |           |      |       |          |          |            |
|-------|-----------|-----------|-----------|------|-------|----------|----------|------------|
| chr15 | 70292701  | 70293700  |           | Down | -1.12 | 8.25E-05 | 0.008887 | Intergenic |
| chr17 | 49383101  | 49386500  |           | Down | -1.12 | 0.00012  | 0.011861 | Intergenic |
| chr17 | 49550201  | 49553200  |           | Down | -1.12 | 0.000125 | 0.012382 | Intergenic |
| chr4  | 80302101  | 80303300  | Mrps12    | Down | -1.13 | 7.43E-05 | 0.008255 | 3k promote |
| chr15 | 6017101   | 6018200   | Hipk3     | Down | -1.13 | 3.73E-06 | 0.000938 | Genebody   |
| chr7  | 131819001 | 131820000 | Spetex-2H | Down | -1.13 | 3.47E-05 | 0.004826 | Genebody   |
| chr6  | 139330501 | 139331800 |           | Down | -1.13 | 2.15E-07 | 0.000161 | Intergenic |
| chr4  | 16289701  | 16291600  |           | Down | -1.13 | 4.14E-07 | 0.000232 | Intergenic |
| chr6  | 138909601 | 138911600 |           | Down | -1.13 | 1.80E-06 | 0.000568 | Intergenic |
| chr1  | 112619701 | 112620900 |           | Down | -1.13 | 1.80E-06 | 0.000568 | Intergenic |
| chr17 | 49622401  | 49624300  |           | Down | -1.13 | 1.83E-06 | 0.000571 | Intergenic |
| chr16 | 21369401  | 21371200  |           | Down | -1.13 | 1.87E-06 | 0.000576 | Intergenic |
| chr14 | 48755701  | 48758200  |           | Down | -1.13 | 2.07E-06 | 0.000619 | Intergenic |
| chr2  | 683401    | 688900    |           | Down | -1.13 | 3.33E-06 | 0.000865 | Intergenic |
| chr16 | 21492101  | 21496000  |           | Down | -1.13 | 3.95E-06 | 0.000974 | Intergenic |
| chr16 | 30946601  | 30947800  |           | Down | -1.13 | 4.10E-06 | 0.001002 | Intergenic |
| chr17 | 49607701  | 49609900  |           | Down | -1.13 | 9.01E-06 | 0.001813 | Intergenic |
| chr17 | 33464901  | 33466100  |           | Down | -1.13 | 1.05E-05 | 0.002035 | Intergenic |
| chr1  | 48373801  | 48374900  |           | Down | -1.13 | 1.17E-05 | 0.002189 | Intergenic |
| chr17 | 16699801  | 16700800  |           | Down | -1.13 | 1.34E-05 | 0.002408 | Intergenic |
| chr16 | 70330601  | 70331600  |           | Down | -1.13 | 1.59E-05 | 0.002748 | Intergenic |
| chr2  | 1398701   | 1402000   |           | Down | -1.13 | 1.76E-05 | 0.002961 | Intergenic |
| chr6  | 139555301 | 139556400 |           | Down | -1.13 | 2.44E-05 | 0.003761 | Intergenic |
| chr6  | 139313901 | 139315800 |           | Down | -1.13 | 3.31E-05 | 0.004661 | Intergenic |
| chr7  | 5938201   | 5939400   |           | Down | -1.13 | 3.44E-05 | 0.004806 | Intergenic |
| chr9  | 813701    | 814700    |           | Down | -1.13 | 4.26E-05 | 0.005608 | Intergenic |
| chr16 | 27602201  | 27603400  |           | Down | -1.13 | 6.11E-05 | 0.007206 | Intergenic |
| chr17 | 69890101  | 69891100  |           | Down | -1.13 | 9.21E-05 | 0.009562 | Intergenic |
| chr5  | 140347201 | 140348200 |           | Down | -1.13 | 9.48E-05 | 0.009717 | Intergenic |
| chr4  | 160340101 | 160341100 |           | Down | -1.13 | 9.94E-05 | 0.010033 | Intergenic |
| chr1  | 250919401 | 250920400 |           | Down | -1.13 | 9.98E-05 | 0.010051 | Intergenic |
| chr1  | 243622201 | 243623900 |           | Down | -1.13 | 9.99E-05 | 0.010053 | Intergenic |
| chr6  | 139781701 | 139783400 |           | Down | -1.13 | 0.000308 | 0.029383 | Intergenic |
| chr1  | 227108001 | 227109300 | Trim8     | Down | -1.14 | 1.61E-05 | 0.002778 | 3k promote |
| chr13 | 77735601  | 77736600  | Rims2     | Down | -1.14 | 6.05E-06 | 0.00133  | Genebody   |
| chr18 | 5914201   | 5915200   | Abca13    | Down | -1.14 | 2.85E-05 | 0.00418  | Genebody   |
| chr1  | 153747001 | 153748000 | Fip1l1    | Down | -1.14 | 8.24E-05 | 0.008887 | Genebody   |
| chr2  | 5501      | 7900      |           | Down | -1.14 | 5.37E-07 | 0.000269 | Intergenic |
| chr6  | 139300901 | 139302600 |           | Down | -1.14 | 6.91E-07 | 0.000305 | Intergenic |
| chr5  | 171180301 | 171181800 |           | Down | -1.14 | 9.93E-07 | 0.000388 | Intergenic |
| chr6  | 139414601 | 139417500 |           | Down | -1.14 | 1.10E-06 | 0.000412 | Intergenic |
| chr16 | 21316801  | 21319500  |           | Down | -1.14 | 1.84E-06 | 0.000571 | Intergenic |
| chr6  | 139859401 | 139863000 |           | Down | -1.14 | 1.94E-06 | 0.000591 | Intergenic |
| chr5  | 127154601 | 127155700 |           | Down | -1.14 | 2.96E-06 | 0.000792 | Intergenic |
| chrX  | 129663501 | 129664900 |           | Down | -1.14 | 3.36E-06 | 0.000871 | Intergenic |
| chr1  | 73381301  | 73382600  |           | Down | -1.14 | 5.49E-06 | 0.001236 | Intergenic |
| chr16 | 21684301  | 21686200  |           | Down | -1.14 | 8.17E-06 | 0.001674 | Intergenic |
| chr18 | 3939001   | 3940300   |           | Down | -1.14 | 9.03E-06 | 0.001815 | Intergenic |

|       |           |           |         |      |       |          |          |            |
|-------|-----------|-----------|---------|------|-------|----------|----------|------------|
| chr4  | 57821701  | 57823700  |         | Down | -1.14 | 1.23E-05 | 0.002262 | Intergenic |
| chr10 | 102433401 | 102434400 |         | Down | -1.14 | 1.73E-05 | 0.00293  | Intergenic |
| chr20 | 38396701  | 38398600  |         | Down | -1.14 | 2.11E-05 | 0.003384 | Intergenic |
| chrX  | 130270001 | 130271800 |         | Down | -1.14 | 2.45E-05 | 0.003773 | Intergenic |
| chrX  | 130338401 | 130340000 |         | Down | -1.14 | 2.69E-05 | 0.004008 | Intergenic |
| chr1  | 50425901  | 50427000  |         | Down | -1.14 | 2.93E-05 | 0.004269 | Intergenic |
| chr6  | 139239401 | 139240900 |         | Down | -1.14 | 3.19E-05 | 0.00453  | Intergenic |
| chr17 | 49636601  | 49637700  |         | Down | -1.14 | 3.36E-05 | 0.004713 | Intergenic |
| chr2  | 210792701 | 210794600 |         | Down | -1.14 | 4.68E-05 | 0.005985 | Intergenic |
| chr16 | 21620301  | 21621700  |         | Down | -1.14 | 6.83E-05 | 0.007808 | Intergenic |
| chr16 | 27857201  | 27858200  |         | Down | -1.14 | 8.09E-05 | 0.008753 | Intergenic |
| chr7  | 16876201  | 16877200  |         | Down | -1.14 | 9.03E-05 | 0.009438 | Intergenic |
| chr15 | 88435101  | 88436100  |         | Down | -1.14 | 9.27E-05 | 0.009575 | Intergenic |
| chr6  | 139271101 | 139272800 |         | Down | -1.14 | 0.000118 | 0.011721 | Intergenic |
| chr20 | 24144701  | 24146600  |         | Down | -1.14 | 0.000149 | 0.014572 | Intergenic |
| chr18 | 38809901  | 38811700  |         | Down | -1.14 | 0.000196 | 0.019006 | Intergenic |
| chr2  | 1395101   | 1396800   |         | Down | -1.14 | 0.000214 | 0.020678 | Intergenic |
| chr1  | 83845701  | 83846700  | Olr1    | Down | -1.15 | 2.07E-06 | 0.000619 | 3k promote |
| chr12 | 36304501  | 36305600  | Cyp2c7  | Down | -1.15 | 8.55E-07 | 0.000349 | Genebody   |
| chr15 | 2025201   | 2026400   | Slc12a6 | Down | -1.15 | 6.95E-06 | 0.001485 | Genebody   |
| chr13 | 70260201  | 70261200  | Ppia    | Down | -1.15 | 2.88E-05 | 0.004215 | Genebody   |
| chr15 | 5978501   | 5979500   | Ercc5   | Down | -1.15 | 4.27E-05 | 0.005615 | Genebody   |
| chr13 | 44365801  | 44366800  | Sult2a2 | Down | -1.15 | 5.67E-05 | 0.006837 | Genebody   |
| chr4  | 111615601 | 111618200 | Xpr1    | Down | -1.15 | 5.82E-05 | 0.006967 | Genebody   |
| chr1  | 51462801  | 51465800  |         | Down | -1.15 | 6.08E-07 | 0.000285 | Intergenic |
| chrX  | 129010101 | 129011700 |         | Down | -1.15 | 6.06E-07 | 0.000285 | Intergenic |
| chr5  | 138053301 | 138055000 |         | Down | -1.15 | 6.41E-07 | 0.000293 | Intergenic |
| chr16 | 64929301  | 64931200  |         | Down | -1.15 | 6.48E-07 | 0.000295 | Intergenic |
| chr9  | 7022201   | 7024100   |         | Down | -1.15 | 6.57E-07 | 0.000297 | Intergenic |
| chr19 | 32017101  | 32019100  |         | Down | -1.15 | 7.70E-07 | 0.000327 | Intergenic |
| chr4  | 57807501  | 57811400  |         | Down | -1.15 | 1.16E-06 | 0.000427 | Intergenic |
| chrX  | 130530001 | 130532500 |         | Down | -1.15 | 1.36E-06 | 0.000471 | Intergenic |
| chrX  | 128913301 | 128916200 |         | Down | -1.15 | 1.72E-06 | 0.000555 | Intergenic |
| chr6  | 139323301 | 139328100 |         | Down | -1.15 | 1.79E-06 | 0.000568 | Intergenic |
| chr1  | 52526701  | 52528500  |         | Down | -1.15 | 1.86E-06 | 0.000575 | Intergenic |
| chr8  | 42241301  | 42242800  |         | Down | -1.15 | 4.42E-06 | 0.001058 | Intergenic |
| chr16 | 22088801  | 22089800  |         | Down | -1.15 | 5.46E-06 | 0.001232 | Intergenic |
| chr6  | 139486901 | 139488800 |         | Down | -1.15 | 1.16E-05 | 0.002176 | Intergenic |
| chr17 | 77450401  | 77451400  |         | Down | -1.15 | 1.43E-05 | 0.002534 | Intergenic |
| chrX  | 129768701 | 129773200 |         | Down | -1.15 | 1.65E-05 | 0.002825 | Intergenic |
| chr18 | 20109101  | 20110200  |         | Down | -1.15 | 1.84E-05 | 0.003056 | Intergenic |
| chr1  | 191883101 | 191884300 |         | Down | -1.15 | 2.30E-05 | 0.003607 | Intergenic |
| chr1  | 48193101  | 48194100  |         | Down | -1.15 | 2.51E-05 | 0.003833 | Intergenic |
| chrX  | 129236201 | 129237500 |         | Down | -1.15 | 2.52E-05 | 0.003834 | Intergenic |
| chrX  | 129004501 | 129009600 |         | Down | -1.15 | 2.89E-05 | 0.004232 | Intergenic |
| chr8  | 96262301  | 96263600  |         | Down | -1.15 | 4.17E-05 | 0.005527 | Intergenic |
| chr16 | 27919301  | 27920300  |         | Down | -1.15 | 4.30E-05 | 0.005649 | Intergenic |
| chr8  | 42083701  | 42089100  |         | Down | -1.15 | 4.66E-05 | 0.005968 | Intergenic |

|       |           |           |         |       |          |          |            |            |
|-------|-----------|-----------|---------|-------|----------|----------|------------|------------|
| chr16 | 21448701  | 21449700  | Down    | -1.15 | 6.16E-05 | 0.007254 | Intergenic |            |
| chr15 | 89232501  | 89233500  | Down    | -1.15 | 7.15E-05 | 0.008062 | Intergenic |            |
| chr1  | 47727901  | 47728900  | Down    | -1.15 | 7.97E-05 | 0.008642 | Intergenic |            |
| chr6  | 138989701 | 138990800 | Down    | -1.15 | 9.01E-05 | 0.009421 | Intergenic |            |
| chrX  | 51494001  | 51495000  | Down    | -1.15 | 9.71E-05 | 0.00986  | Intergenic |            |
| chr1  | 191884401 | 191886100 | Down    | -1.15 | 0.0001   | 0.010062 | Intergenic |            |
| chrX  | 130298601 | 130300100 | Down    | -1.15 | 0.000127 | 0.012534 | Intergenic |            |
| chr20 | 37984501  | 37986300  | Down    | -1.15 | 0.00041  | 0.038844 | Intergenic |            |
| chr20 | 5049601   | 5050600   | ift81   | Down  | -1.16    | 2.64E-05 | 0.003956   | Genebody   |
| chr19 | 12066301  | 12067600  | Cbfa2t3 | Down  | -1.16    | 4.97E-05 | 0.006228   | Genebody   |
| chr15 | 5606201   | 5607200   | Yaf2    | Down  | -1.16    | 9.04E-05 | 0.009443   | Genebody   |
| chr12 | 46776601  | 46778500  |         | Down  | -1.16    | 9.09E-08 | 8.18E-05   | Intergenic |
| chr20 | 38251201  | 38253100  |         | Down  | -1.16    | 3.18E-07 | 0.000202   | Intergenic |
| chr16 | 27640401  | 27642500  |         | Down  | -1.16    | 4.20E-07 | 0.000233   | Intergenic |
| chr6  | 139502201 | 139504600 |         | Down  | -1.16    | 5.63E-07 | 0.000275   | Intergenic |
| chr1  | 50341501  | 50343100  |         | Down  | -1.16    | 6.87E-07 | 0.000304   | Intergenic |
| chr17 | 49431401  | 49433300  |         | Down  | -1.16    | 7.82E-07 | 0.00033    | Intergenic |
| chr1  | 50956701  | 50957900  |         | Down  | -1.16    | 8.10E-07 | 0.000338   | Intergenic |
| chr6  | 138879401 | 138881200 |         | Down  | -1.16    | 8.63E-07 | 0.000351   | Intergenic |
| chr5  | 128373001 | 128374500 |         | Down  | -1.16    | 9.99E-07 | 0.000389   | Intergenic |
| chr6  | 138774101 | 138775800 |         | Down  | -1.16    | 1.00E-06 | 0.00039    | Intergenic |
| chr16 | 21135301  | 21137300  |         | Down  | -1.16    | 1.24E-06 | 0.000447   | Intergenic |
| chr16 | 37880001  | 37886200  |         | Down  | -1.16    | 1.24E-06 | 0.000447   | Intergenic |
| chr6  | 139524701 | 139526600 |         | Down  | -1.16    | 1.35E-06 | 0.00047    | Intergenic |
| chr7  | 3340901   | 3345700   |         | Down  | -1.16    | 1.61E-06 | 0.000528   | Intergenic |
| chr1  | 243613001 | 243614600 |         | Down  | -1.16    | 1.74E-06 | 0.000559   | Intergenic |
| chr16 | 20868901  | 20871800  |         | Down  | -1.16    | 1.95E-06 | 0.000592   | Intergenic |
| chr6  | 139764401 | 139769000 |         | Down  | -1.16    | 2.08E-06 | 0.00062    | Intergenic |
| chr16 | 21271301  | 21274000  |         | Down  | -1.16    | 3.01E-06 | 0.000802   | Intergenic |
| chr18 | 85662701  | 85663700  |         | Down  | -1.16    | 3.09E-06 | 0.000815   | Intergenic |
| chr17 | 50047401  | 50049000  |         | Down  | -1.16    | 5.96E-06 | 0.001318   | Intergenic |
| chr1  | 51550901  | 51552100  |         | Down  | -1.16    | 6.32E-06 | 0.001376   | Intergenic |
| chr14 | 103137301 | 103138800 |         | Down  | -1.16    | 7.65E-06 | 0.001594   | Intergenic |
| chrX  | 129064301 | 129072100 |         | Down  | -1.16    | 8.50E-06 | 0.001732   | Intergenic |
| chrX  | 130332701 | 130338300 |         | Down  | -1.16    | 1.03E-05 | 0.00201    | Intergenic |
| chr3  | 63421701  | 63422700  |         | Down  | -1.16    | 1.14E-05 | 0.002146   | Intergenic |
| chr1  | 50394201  | 50395400  |         | Down  | -1.16    | 1.25E-05 | 0.002296   | Intergenic |
| chr3  | 90217501  | 90218900  |         | Down  | -1.16    | 1.42E-05 | 0.002521   | Intergenic |
| chr1  | 188268601 | 188269600 |         | Down  | -1.16    | 2.37E-05 | 0.003684   | Intergenic |
| chrX  | 129479001 | 129480200 |         | Down  | -1.16    | 2.62E-05 | 0.00393    | Intergenic |
| chr1  | 111375201 | 111376300 |         | Down  | -1.16    | 2.74E-05 | 0.004067   | Intergenic |
| chr1  | 51466001  | 51467000  |         | Down  | -1.16    | 2.87E-05 | 0.004207   | Intergenic |
| chr4  | 28888901  | 28890100  |         | Down  | -1.16    | 2.98E-05 | 0.004325   | Intergenic |
| chr6  | 139410801 | 139412500 |         | Down  | -1.16    | 3.72E-05 | 0.005086   | Intergenic |
| chr10 | 29081101  | 29083500  |         | Down  | -1.16    | 4.08E-05 | 0.005428   | Intergenic |
| chr1  | 93535201  | 93536200  |         | Down  | -1.16    | 4.14E-05 | 0.005495   | Intergenic |
| chr14 | 49678901  | 49679900  |         | Down  | -1.16    | 4.55E-05 | 0.005872   | Intergenic |
| chr2  | 52018101  | 52019100  |         | Down  | -1.16    | 5.05E-05 | 0.006294   | Intergenic |

|       |           |           |           |      |       |          |          |            |
|-------|-----------|-----------|-----------|------|-------|----------|----------|------------|
| chr6  | 139774501 | 139775800 |           | Down | -1.16 | 5.18E-05 | 0.006414 | Intergenic |
| chr14 | 101270601 | 101271700 |           | Down | -1.16 | 5.31E-05 | 0.006524 | Intergenic |
| chrX  | 34562101  | 34564400  |           | Down | -1.16 | 6.14E-05 | 0.007226 | Intergenic |
| chr1  | 52365101  | 52366100  |           | Down | -1.16 | 6.93E-05 | 0.007885 | Intergenic |
| chr6  | 91380001  | 91381800  |           | Down | -1.16 | 8.53E-05 | 0.009088 | Intergenic |
| chrX  | 22883201  | 22884700  |           | Down | -1.16 | 8.68E-05 | 0.009183 | Intergenic |
| chr6  | 139057601 | 139059100 |           | Down | -1.16 | 0.000106 | 0.010625 | Intergenic |
| chr1  | 74986201  | 74987200  | Mybpc1    | Down | -1.17 | 2.54E-05 | 0.003849 | Genebody   |
| chr14 | 61713501  | 61714500  | Dnm3      | Down | -1.17 | 5.70E-05 | 0.006866 | Genebody   |
| chr18 | 77333401  | 77334400  | Ss18      | Down | -1.17 | 6.71E-05 | 0.007717 | Genebody   |
| chr15 | 4986801   | 4987800   | Odz4      | Down | -1.17 | 9.52E-05 | 0.009739 | Genebody   |
| chr1  | 51873301  | 51875000  |           | Down | -1.17 | 5.87E-07 | 0.00028  | Intergenic |
| chr16 | 20775801  | 20776900  |           | Down | -1.17 | 6.43E-07 | 0.000293 | Intergenic |
| chr15 | 109392601 | 109394500 |           | Down | -1.17 | 1.08E-06 | 0.000406 | Intergenic |
| chr1  | 47853501  | 47854700  |           | Down | -1.17 | 2.90E-06 | 0.000781 | Intergenic |
| chr17 | 72450201  | 72451800  |           | Down | -1.17 | 3.15E-06 | 0.000829 | Intergenic |
| chr1  | 52390301  | 52391500  |           | Down | -1.17 | 5.17E-06 | 0.001184 | Intergenic |
| chrX  | 128935301 | 128943300 |           | Down | -1.17 | 7.23E-06 | 0.001525 | Intergenic |
| chr10 | 37190701  | 37192600  |           | Down | -1.17 | 9.66E-06 | 0.001916 | Intergenic |
| chr6  | 139017301 | 139018400 |           | Down | -1.17 | 1.21E-05 | 0.002237 | Intergenic |
| chr6  | 138892501 | 138894300 |           | Down | -1.17 | 1.29E-05 | 0.002342 | Intergenic |
| chr1  | 383701    | 385400    |           | Down | -1.17 | 1.55E-05 | 0.002698 | Intergenic |
| chr1  | 52813101  | 52814400  |           | Down | -1.17 | 1.70E-05 | 0.002892 | Intergenic |
| chr7  | 18511101  | 18512100  |           | Down | -1.17 | 1.77E-05 | 0.002973 | Intergenic |
| chr20 | 9981901   | 9983100   |           | Down | -1.17 | 2.52E-05 | 0.003834 | Intergenic |
| chr1  | 243644001 | 243645000 |           | Down | -1.17 | 3.62E-05 | 0.004977 | Intergenic |
| chr8  | 41728901  | 41729900  |           | Down | -1.17 | 3.98E-05 | 0.005333 | Intergenic |
| chr7  | 99478501  | 99479500  |           | Down | -1.17 | 5.00E-05 | 0.006254 | Intergenic |
| chr5  | 128408901 | 128411300 |           | Down | -1.17 | 5.91E-05 | 0.007053 | Intergenic |
| chrX  | 92007701  | 92009600  |           | Down | -1.17 | 6.60E-05 | 0.007627 | Intergenic |
| chr16 | 21206201  | 21207200  |           | Down | -1.17 | 9.10E-05 | 0.009475 | Intergenic |
| chr2  | 154387601 | 154388600 |           | Down | -1.17 | 9.68E-05 | 0.009838 | Intergenic |
| chr16 | 31433601  | 31434800  |           | Down | -1.17 | 0.000177 | 0.017275 | Intergenic |
| chr20 | 38243601  | 38244900  |           | Down | -1.17 | 0.000205 | 0.019829 | Intergenic |
| chr16 | 27219901  | 27221400  |           | Down | -1.17 | 0.000237 | 0.022843 | Intergenic |
| chr6  | 139498901 | 139500100 |           | Down | -1.17 | 0.000393 | 0.03729  | Intergenic |
| chr1  | 251721401 | 251722400 | Polb      | Down | -1.18 | 3.61E-05 | 0.004964 | 3k promote |
| chr9  | 1035701   | 1037000   | Spetex-2H | Down | -1.18 | 3.32E-07 | 0.000208 | Genebody   |
| chr1  | 225051301 | 225052700 | Spetex-2H | Down | -1.18 | 2.43E-06 | 0.000686 | Genebody   |
| chr10 | 64073601  | 64074700  | Phf12     | Down | -1.18 | 1.33E-05 | 0.002406 | Genebody   |
| chr1  | 48459201  | 48461700  |           | Down | -1.18 | 1.54E-07 | 0.000127 | Intergenic |
| chr20 | 39718301  | 39720200  |           | Down | -1.18 | 3.46E-07 | 0.000211 | Intergenic |
| chr16 | 21431601  | 21433900  |           | Down | -1.18 | 3.63E-07 | 0.000215 | Intergenic |
| chr16 | 37891701  | 37896400  |           | Down | -1.18 | 4.36E-07 | 0.000239 | Intergenic |
| chr16 | 21446401  | 21448400  |           | Down | -1.18 | 5.63E-07 | 0.000275 | Intergenic |
| chr19 | 57007701  | 57008700  |           | Down | -1.18 | 6.87E-07 | 0.000304 | Intergenic |
| chr6  | 139500201 | 139501900 |           | Down | -1.18 | 7.78E-07 | 0.000329 | Intergenic |
| chr6  | 139704201 | 139706100 |           | Down | -1.18 | 7.79E-07 | 0.000329 | Intergenic |



|       |           |           |           |       |          |          |            |            |
|-------|-----------|-----------|-----------|-------|----------|----------|------------|------------|
| chr16 | 21635601  | 21637900  | Down      | -1.18 | 1.21E-06 | 0.000442 | Intergenic |            |
| chrX  | 130092501 | 130094100 | Down      | -1.18 | 1.24E-06 | 0.000447 | Intergenic |            |
| chr6  | 138889501 | 138892300 | Down      | -1.18 | 1.58E-06 | 0.000521 | Intergenic |            |
| chr17 | 49610001  | 49612100  | Down      | -1.18 | 1.78E-06 | 0.000567 | Intergenic |            |
| chr8  | 100271301 | 100272400 | Down      | -1.18 | 1.94E-06 | 0.000591 | Intergenic |            |
| chrX  | 106753001 | 106754900 | Down      | -1.18 | 2.14E-06 | 0.000631 | Intergenic |            |
| chrX  | 129060201 | 129061600 | Down      | -1.18 | 2.87E-06 | 0.000776 | Intergenic |            |
| chrX  | 129252401 | 129254500 | Down      | -1.18 | 3.75E-06 | 0.000939 | Intergenic |            |
| chr8  | 39879701  | 39881400  | Down      | -1.18 | 4.68E-06 | 0.001107 | Intergenic |            |
| chr4  | 187124901 | 187126100 | Down      | -1.18 | 4.94E-06 | 0.001144 | Intergenic |            |
| chr6  | 100406101 | 100407100 | Down      | -1.18 | 5.57E-06 | 0.001251 | Intergenic |            |
| chrX  | 129145301 | 129151000 | Down      | -1.18 | 6.00E-06 | 0.001325 | Intergenic |            |
| chr17 | 49653701  | 49655200  | Down      | -1.18 | 6.18E-06 | 0.001349 | Intergenic |            |
| chr2  | 194950601 | 194951700 | Down      | -1.18 | 9.19E-06 | 0.001842 | Intergenic |            |
| chr15 | 4729201   | 4730600   | Down      | -1.18 | 1.05E-05 | 0.002039 | Intergenic |            |
| chr5  | 55205701  | 55206700  | Down      | -1.18 | 1.11E-05 | 0.002119 | Intergenic |            |
| chrX  | 129352301 | 129354100 | Down      | -1.18 | 1.37E-05 | 0.002445 | Intergenic |            |
| chr17 | 12310401  | 12311400  | Down      | -1.18 | 1.41E-05 | 0.002492 | Intergenic |            |
| chr6  | 138668101 | 138669500 | Down      | -1.18 | 2.08E-05 | 0.003358 | Intergenic |            |
| chr1  | 47874201  | 47875200  | Down      | -1.18 | 2.50E-05 | 0.003817 | Intergenic |            |
| chr14 | 92223901  | 92224900  | Down      | -1.18 | 2.72E-05 | 0.004045 | Intergenic |            |
| chr2  | 189039501 | 189040500 | Down      | -1.18 | 2.93E-05 | 0.004269 | Intergenic |            |
| chr1  | 52747301  | 52748400  | Down      | -1.18 | 3.50E-05 | 0.004856 | Intergenic |            |
| chr2  | 942701    | 944600    | Down      | -1.18 | 3.51E-05 | 0.004866 | Intergenic |            |
| chrX  | 130254001 | 130255000 | Down      | -1.18 | 3.96E-05 | 0.005315 | Intergenic |            |
| chr3  | 162802501 | 162803500 | Down      | -1.18 | 4.30E-05 | 0.005649 | Intergenic |            |
| chr2  | 156714901 | 156716200 | Down      | -1.18 | 4.97E-05 | 0.006228 | Intergenic |            |
| chr2  | 184997001 | 184998200 | Down      | -1.18 | 5.57E-05 | 0.006761 | Intergenic |            |
| chr1  | 111684301 | 111685300 | Down      | -1.18 | 6.31E-05 | 0.007373 | Intergenic |            |
| chr6  | 139398601 | 139399600 | Down      | -1.18 | 6.78E-05 | 0.007769 | Intergenic |            |
| chr20 | 13201701  | 13202700  | Down      | -1.18 | 6.92E-05 | 0.007883 | Intergenic |            |
| chr2  | 1250701   | 1251700   | Down      | -1.18 | 7.44E-05 | 0.008255 | Intergenic |            |
| chr4  | 167502101 | 167503100 | Down      | -1.18 | 8.92E-05 | 0.009347 | Intergenic |            |
| chr5  | 9189701   | 9190700   | Down      | -1.18 | 9.10E-05 | 0.009475 | Intergenic |            |
| chr1  | 52765601  | 52766600  | Down      | -1.18 | 9.61E-05 | 0.009785 | Intergenic |            |
| chr1  | 50443601  | 50444600  | Down      | -1.18 | 9.68E-05 | 0.009838 | Intergenic |            |
| chr10 | 45872801  | 45873800  | Nrg2      | Down  | -1.19    | 5.67E-06 | 0.00127    | Genebody   |
| chr15 | 5250501   | 5251900   | LOC300308 | Down  | -1.19    | 1.45E-05 | 0.002558   | Genebody   |
| chr7  | 19079501  | 19080700  | Odz2      | Down  | -1.19    | 3.58E-05 | 0.004932   | Genebody   |
| chr4  | 156182401 | 156183400 | Xpr1      | Down  | -1.19    | 4.22E-05 | 0.005577   | Genebody   |
| chr5  | 129901001 | 129902000 | Spetex-2C | Down  | -1.19    | 5.81E-05 | 0.006967   | Genebody   |
| chr1  | 74970101  | 74971100  | Srgap2    | Down  | -1.19    | 9.53E-05 | 0.009741   | Genebody   |
| chr16 | 21148601  | 21150300  |           | Down  | -1.19    | 4.51E-07 | 0.000242   | Intergenic |
| chr2  | 154419301 | 154420600 |           | Down  | -1.19    | 1.01E-06 | 0.000391   | Intergenic |
| chr5  | 7234601   | 7236500   |           | Down  | -1.19    | 1.07E-06 | 0.000405   | Intergenic |
| chr6  | 139463501 | 139466600 |           | Down  | -1.19    | 1.34E-06 | 0.000467   | Intergenic |
| chr6  | 139785701 | 139790300 |           | Down  | -1.19    | 1.76E-06 | 0.000563   | Intergenic |
| chr1  | 52761901  | 52763300  |           | Down  | -1.19    | 1.81E-06 | 0.00057    | Intergenic |

|       |           |           |           |      |       |          |          |            |
|-------|-----------|-----------|-----------|------|-------|----------|----------|------------|
| chr17 | 49592501  | 49596700  |           | Down | -1.19 | 2.55E-06 | 0.000709 | Intergenic |
| chr1  | 47733001  | 47735200  |           | Down | -1.19 | 2.59E-06 | 0.000717 | Intergenic |
| chr8  | 42238401  | 42240200  |           | Down | -1.19 | 2.79E-06 | 0.00076  | Intergenic |
| chr1  | 111377901 | 111379800 |           | Down | -1.19 | 4.30E-06 | 0.001037 | Intergenic |
| chr18 | 30445601  | 30446600  |           | Down | -1.19 | 4.39E-06 | 0.001053 | Intergenic |
| chr6  | 139484901 | 139486600 |           | Down | -1.19 | 5.75E-06 | 0.001283 | Intergenic |
| chr9  | 5549201   | 5550500   |           | Down | -1.19 | 1.09E-05 | 0.002084 | Intergenic |
| chrX  | 130304201 | 130307100 |           | Down | -1.19 | 1.11E-05 | 0.002112 | Intergenic |
| chr17 | 31880301  | 31881300  |           | Down | -1.19 | 1.34E-05 | 0.00241  | Intergenic |
| chrX  | 129665601 | 129668800 |           | Down | -1.19 | 2.09E-05 | 0.003365 | Intergenic |
| chr6  | 139983901 | 139984900 |           | Down | -1.19 | 2.18E-05 | 0.003463 | Intergenic |
| chr10 | 103849901 | 103850900 |           | Down | -1.19 | 2.24E-05 | 0.003545 | Intergenic |
| chr1  | 52055901  | 52056900  |           | Down | -1.19 | 2.48E-05 | 0.003795 | Intergenic |
| chr7  | 35266601  | 35267600  |           | Down | -1.19 | 2.48E-05 | 0.003795 | Intergenic |
| chr17 | 96404201  | 96405300  |           | Down | -1.19 | 2.54E-05 | 0.003849 | Intergenic |
| chr15 | 26360901  | 26362100  |           | Down | -1.19 | 4.92E-05 | 0.006199 | Intergenic |
| chr5  | 73466501  | 73467500  |           | Down | -1.19 | 6.78E-05 | 0.007769 | Intergenic |
| chr6  | 42645101  | 42646100  |           | Down | -1.19 | 6.80E-05 | 0.007783 | Intergenic |
| chr6  | 139454801 | 139456700 |           | Down | -1.19 | 7.13E-05 | 0.008047 | Intergenic |
| chr6  | 139087501 | 139088500 |           | Down | -1.19 | 7.65E-05 | 0.008406 | Intergenic |
| chr3  | 138265301 | 138266300 |           | Down | -1.19 | 8.30E-05 | 0.008927 | Intergenic |
| chr19 | 57683501  | 57685400  |           | Down | -1.19 | 8.40E-05 | 0.008982 | Intergenic |
| chr11 | 51548401  | 51549400  |           | Down | -1.19 | 9.74E-05 | 0.009874 | Intergenic |
| chr4  | 166767201 | 166768800 | Lgr4      | Down | -1.2  | 3.96E-06 | 0.000975 | 3k promote |
| chr3  | 128030601 | 128031600 | Pde10a    | Down | -1.2  | 4.10E-06 | 0.001002 | Genebody   |
| chr11 | 11357301  | 11358400  | RT1-A3    | Down | -1.2  | 1.17E-05 | 0.002191 | Genebody   |
| chr2  | 27016701  | 27017700  | Spetex-2H | Down | -1.2  | 4.10E-05 | 0.005447 | Genebody   |
| chrX  | 18059501  | 18060700  | Sult2a2   | Down | -1.2  | 7.24E-05 | 0.008131 | Genebody   |
| chr1  | 74532001  | 74533000  | Stim2     | Down | -1.2  | 7.88E-05 | 0.008563 | Genebody   |
| chr6  | 141227101 | 141229000 |           | Down | -1.2  | 3.95E-07 | 0.000227 | Intergenic |
| chr10 | 403601    | 405700    |           | Down | -1.2  | 4.66E-07 | 0.000244 | Intergenic |
| chr16 | 21126801  | 21129000  |           | Down | -1.2  | 6.24E-07 | 0.000289 | Intergenic |
| chrX  | 129041801 | 129042900 |           | Down | -1.2  | 8.55E-07 | 0.000349 | Intergenic |
| chr13 | 38125401  | 38126500  |           | Down | -1.2  | 8.93E-07 | 0.00036  | Intergenic |
| chr6  | 138904301 | 138906200 |           | Down | -1.2  | 9.02E-07 | 0.000363 | Intergenic |
| chr6  | 139989701 | 139991700 |           | Down | -1.2  | 9.42E-07 | 0.000373 | Intergenic |
| chr6  | 139457801 | 139461600 |           | Down | -1.2  | 1.45E-06 | 0.00049  | Intergenic |
| chrX  | 128959401 | 128961300 |           | Down | -1.2  | 2.19E-06 | 0.000641 | Intergenic |
| chr14 | 21918701  | 21920200  |           | Down | -1.2  | 2.39E-06 | 0.00068  | Intergenic |
| chr14 | 49662201  | 49663900  |           | Down | -1.2  | 2.98E-06 | 0.000794 | Intergenic |
| chr1  | 52759801  | 52761000  |           | Down | -1.2  | 3.35E-06 | 0.00087  | Intergenic |
| chr14 | 49271801  | 49273200  |           | Down | -1.2  | 3.50E-06 | 0.000898 | Intergenic |
| chrX  | 130316801 | 130318900 |           | Down | -1.2  | 7.57E-06 | 0.001582 | Intergenic |
| chr3  | 137570101 | 137571200 |           | Down | -1.2  | 9.96E-06 | 0.001956 | Intergenic |
| chr16 | 2455301   | 2456800   |           | Down | -1.2  | 1.29E-05 | 0.002341 | Intergenic |
| chr3  | 138143601 | 138144800 |           | Down | -1.2  | 1.35E-05 | 0.002424 | Intergenic |
| chrX  | 129120601 | 129122500 |           | Down | -1.2  | 1.52E-05 | 0.00266  | Intergenic |
| chr6  | 139376501 | 139377500 |           | Down | -1.2  | 1.56E-05 | 0.002712 | Intergenic |

|       |           |           |           |      |          |          |            |            |
|-------|-----------|-----------|-----------|------|----------|----------|------------|------------|
| chr1  | 48266801  | 48267800  | Down      | -1.2 | 1.59E-05 | 0.002749 | Intergenic |            |
| chr2  | 132220101 | 132221100 | Down      | -1.2 | 2.25E-05 | 0.003554 | Intergenic |            |
| chr3  | 53367501  | 53368500  | Down      | -1.2 | 2.55E-05 | 0.003853 | Intergenic |            |
| chrX  | 130153601 | 130155000 | Down      | -1.2 | 3.08E-05 | 0.004422 | Intergenic |            |
| chr16 | 27255201  | 27256200  | Down      | -1.2 | 5.36E-05 | 0.006568 | Intergenic |            |
| chr9  | 5861101   | 5862100   | Down      | -1.2 | 5.62E-05 | 0.006804 | Intergenic |            |
| chr14 | 21931101  | 21932200  | Down      | -1.2 | 6.42E-05 | 0.007474 | Intergenic |            |
| chrX  | 31283701  | 31284800  | Down      | -1.2 | 6.65E-05 | 0.007665 | Intergenic |            |
| chr8  | 40074101  | 40075100  | Down      | -1.2 | 8.69E-05 | 0.009183 | Intergenic |            |
| chr10 | 23812901  | 23815100  | Down      | -1.2 | 9.90E-05 | 0.010006 | Intergenic |            |
| chr16 | 31126601  | 31128200  | Down      | -1.2 | 0.000459 | 0.043426 | Intergenic |            |
| chr3  | 95775201  | 95776400  | Ctdp1     | Down | -1.21    | 1.17E-05 | 0.002189   | Genebody   |
| chr19 | 52940901  | 52943300  | Spetex-2H | Down | -1.21    | 2.30E-05 | 0.003603   | Genebody   |
| chr18 | 28735801  | 28736900  | Ctnnbl1   | Down | -1.21    | 6.88E-05 | 0.007849   | Genebody   |
| chr1  | 74946501  | 74947500  | Lphn3     | Down | -1.21    | 7.86E-05 | 0.008547   | Genebody   |
| chr17 | 71496701  | 71497700  | Gpsm2     | Down | -1.21    | 0.000105 | 0.010526   | Genebody   |
| chr1  | 74862101  | 74863100  | Gas2      | Down | -1.21    | 0.000115 | 0.011444   | Genebody   |
| chr15 | 4732401   | 4734200   |           | Down | -1.21    | 6.49E-08 | 6.11E-05   | Intergenic |
| chr17 | 49251101  | 49252800  |           | Down | -1.21    | 2.70E-07 | 0.000183   | Intergenic |
| chr14 | 21915901  | 21917500  |           | Down | -1.21    | 3.64E-07 | 0.000215   | Intergenic |
| chr16 | 21231101  | 21232200  |           | Down | -1.21    | 4.64E-07 | 0.000244   | Intergenic |
| chr4  | 57746001  | 57747900  |           | Down | -1.21    | 4.65E-07 | 0.000244   | Intergenic |
| chr6  | 139967401 | 139969600 |           | Down | -1.21    | 4.65E-07 | 0.000244   | Intergenic |
| chr16 | 21452201  | 21454100  |           | Down | -1.21    | 5.49E-07 | 0.000272   | Intergenic |
| chr17 | 49685701  | 49686700  |           | Down | -1.21    | 7.14E-07 | 0.000311   | Intergenic |
| chr2  | 194801    | 197300    |           | Down | -1.21    | 7.21E-07 | 0.000312   | Intergenic |
| chr15 | 77114301  | 77116500  |           | Down | -1.21    | 8.02E-07 | 0.000335   | Intergenic |
| chr16 | 20739901  | 20743000  |           | Down | -1.21    | 9.69E-07 | 0.000382   | Intergenic |
| chr1  | 112599601 | 112605600 |           | Down | -1.21    | 9.87E-07 | 0.000387   | Intergenic |
| chr1  | 75583001  | 75584300  |           | Down | -1.21    | 1.28E-06 | 0.000456   | Intergenic |
| chr2  | 161150801 | 161151800 |           | Down | -1.21    | 1.41E-06 | 0.000483   | Intergenic |
| chr18 | 47413101  | 47415000  |           | Down | -1.21    | 1.92E-06 | 0.000587   | Intergenic |
| chr2  | 172801    | 177300    |           | Down | -1.21    | 2.27E-06 | 0.000658   | Intergenic |
| chrX  | 129167901 | 129173000 |           | Down | -1.21    | 2.33E-06 | 0.000669   | Intergenic |
| chr3  | 131201    | 133800    |           | Down | -1.21    | 2.61E-06 | 0.000722   | Intergenic |
| chrX  | 130271901 | 130274500 |           | Down | -1.21    | 2.72E-06 | 0.000743   | Intergenic |
| chr6  | 139971501 | 139972700 |           | Down | -1.21    | 3.43E-06 | 0.000885   | Intergenic |
| chrX  | 130237101 | 130239900 |           | Down | -1.21    | 3.81E-06 | 0.000949   | Intergenic |
| chr2  | 1234501   | 1236300   |           | Down | -1.21    | 4.00E-06 | 0.000983   | Intergenic |
| chrX  | 130118601 | 130125100 |           | Down | -1.21    | 4.08E-06 | 0.001      | Intergenic |
| chrX  | 129133701 | 129134700 |           | Down | -1.21    | 4.97E-06 | 0.001146   | Intergenic |
| chrX  | 130321201 | 130327700 |           | Down | -1.21    | 6.66E-06 | 0.001437   | Intergenic |
| chrX  | 129131301 | 129132300 |           | Down | -1.21    | 1.29E-05 | 0.00234    | Intergenic |
| chrX  | 130255101 | 130256600 |           | Down | -1.21    | 1.33E-05 | 0.002404   | Intergenic |
| chr16 | 27589401  | 27590500  |           | Down | -1.21    | 1.45E-05 | 0.002556   | Intergenic |
| chr2  | 184995701 | 184996900 |           | Down | -1.21    | 2.15E-05 | 0.003433   | Intergenic |
| chr2  | 187118701 | 187119800 |           | Down | -1.21    | 2.29E-05 | 0.003601   | Intergenic |
| chrX  | 22881801  | 22883000  |           | Down | -1.21    | 2.56E-05 | 0.003861   | Intergenic |

|       |           |           |        |       |          |          |            |          |
|-------|-----------|-----------|--------|-------|----------|----------|------------|----------|
| chr18 | 38759201  | 38768800  | Down   | -1.21 | 2.56E-05 | 0.003861 | Intergenic |          |
| chr17 | 49224801  | 49226200  | Down   | -1.21 | 3.06E-05 | 0.004406 | Intergenic |          |
| chr18 | 38747301  | 38758900  | Down   | -1.21 | 3.90E-05 | 0.005259 | Intergenic |          |
| chr17 | 49380301  | 49382500  | Down   | -1.21 | 4.07E-05 | 0.005422 | Intergenic |          |
| chr17 | 49240301  | 49241300  | Down   | -1.21 | 5.14E-05 | 0.006375 | Intergenic |          |
| chr13 | 77583101  | 77584100  | Down   | -1.21 | 6.98E-05 | 0.007925 | Intergenic |          |
| chr6  | 93391201  | 93392200  | Down   | -1.21 | 7.10E-05 | 0.008021 | Intergenic |          |
| chr1  | 52851401  | 52852500  | Down   | -1.21 | 8.60E-05 | 0.009138 | Intergenic |          |
| chr12 | 31876101  | 31877500  | Down   | -1.21 | 0.000188 | 0.018247 | Intergenic |          |
| chr14 | 66503301  | 66505200  | Ctnna2 | Down  | -1.22    | 1.34E-05 | 0.002412   | Genebody |
| chr9  | 90414001  | 90415300  | Nlrp3  | Down  | -1.22    | 1.87E-05 | 0.003091   | Genebody |
| chr5  | 78906001  | 78907000  | Down   | -1.22 | 4.20E-07 | 0.000233 | Intergenic |          |
| chr4  | 106390501 | 106392400 | Down   | -1.22 | 4.68E-07 | 0.000245 | Intergenic |          |
| chr14 | 15396701  | 15398300  | Down   | -1.22 | 4.94E-07 | 0.000253 | Intergenic |          |
| chr14 | 49690001  | 49691600  | Down   | -1.22 | 6.07E-07 | 0.000285 | Intergenic |          |
| chr20 | 36918601  | 36920100  | Down   | -1.22 | 8.46E-07 | 0.000348 | Intergenic |          |
| chr1  | 50958801  | 50960800  | Down   | -1.22 | 1.03E-06 | 0.000397 | Intergenic |          |
| chr16 | 21634201  | 21635400  | Down   | -1.22 | 1.06E-06 | 0.000403 | Intergenic |          |
| chr17 | 49697001  | 49699700  | Down   | -1.22 | 1.10E-06 | 0.000412 | Intergenic |          |
| chr6  | 139032801 | 139033900 | Down   | -1.22 | 1.73E-06 | 0.000557 | Intergenic |          |
| chr7  | 19247401  | 19248700  | Down   | -1.22 | 1.79E-06 | 0.000567 | Intergenic |          |
| chr6  | 139242501 | 139244200 | Down   | -1.22 | 1.82E-06 | 0.000571 | Intergenic |          |
| chr13 | 19130701  | 19135800  | Down   | -1.22 | 2.55E-06 | 0.000709 | Intergenic |          |
| chrX  | 129052401 | 129058700 | Down   | -1.22 | 3.35E-06 | 0.00087  | Intergenic |          |
| chr6  | 139070601 | 139071900 | Down   | -1.22 | 5.42E-06 | 0.001225 | Intergenic |          |
| chr6  | 139448801 | 139451100 | Down   | -1.22 | 6.58E-06 | 0.001423 | Intergenic |          |
| chr1  | 240331101 | 240332100 | Down   | -1.22 | 6.76E-06 | 0.001453 | Intergenic |          |
| chr5  | 141795501 | 141796500 | Down   | -1.22 | 9.77E-06 | 0.001928 | Intergenic |          |
| chr9  | 876701    | 877900    | Down   | -1.22 | 1.06E-05 | 0.002054 | Intergenic |          |
| chr7  | 137171401 | 137172700 | Down   | -1.22 | 1.12E-05 | 0.002122 | Intergenic |          |
| chr12 | 31859301  | 31860300  | Down   | -1.22 | 1.30E-05 | 0.002354 | Intergenic |          |
| chr15 | 4609501   | 4611700   | Down   | -1.22 | 2.04E-05 | 0.0033   | Intergenic |          |
| chr1  | 112608601 | 112609700 | Down   | -1.22 | 2.18E-05 | 0.003469 | Intergenic |          |
| chr2  | 42911001  | 42912100  | Down   | -1.22 | 2.26E-05 | 0.003562 | Intergenic |          |
| chr9  | 24962201  | 24963200  | Down   | -1.22 | 3.93E-05 | 0.005288 | Intergenic |          |
| chr2  | 123642101 | 123643100 | Down   | -1.22 | 6.19E-05 | 0.007282 | Intergenic |          |
| chr5  | 141196201 | 141197300 | Down   | -1.22 | 7.43E-05 | 0.008255 | Intergenic |          |
| chr3  | 536201    | 537200    | Down   | -1.22 | 7.76E-05 | 0.008496 | Intergenic |          |
| chr6  | 91432501  | 91433500  | Down   | -1.22 | 7.95E-05 | 0.00863  | Intergenic |          |
| chr3  | 147401    | 150300    | Down   | -1.22 | 8.64E-05 | 0.009169 | Intergenic |          |
| chrX  | 129557201 | 129558200 | Down   | -1.22 | 8.84E-05 | 0.009285 | Intergenic |          |
| chr18 | 61527701  | 61528700  | Down   | -1.22 | 9.61E-05 | 0.009785 | Intergenic |          |
| chr2  | 113544301 | 113545500 | Map2k6 | Down  | -1.23    | 2.94E-07 | 0.000194   | Genebody |
| chr2  | 181022301 | 181023300 | Erc1   | Down  | -1.23    | 6.21E-05 | 0.0073     | Genebody |
| chr9  | 84548501  | 84549500  | Orc1   | Down  | -1.23    | 6.49E-05 | 0.007529   | Genebody |
| chr7  | 17282901  | 17284700  | Down   | -1.23 | 7.04E-10 | 7.09E-07 | Intergenic |          |
| chr6  | 138995301 | 138996600 | Down   | -1.23 | 3.17E-07 | 0.000202 | Intergenic |          |
| chr17 | 49528801  | 49531300  | Down   | -1.23 | 4.36E-07 | 0.000239 | Intergenic |          |

|       |           |           |          |       |          |          |            |            |
|-------|-----------|-----------|----------|-------|----------|----------|------------|------------|
| chrX  | 129161801 | 129163500 | Down     | -1.23 | 5.12E-07 | 0.00026  | Intergenic |            |
| chr6  | 139222801 | 139225400 | Down     | -1.23 | 5.59E-07 | 0.000275 | Intergenic |            |
| chr6  | 138640101 | 138642600 | Down     | -1.23 | 6.19E-07 | 0.000287 | Intergenic |            |
| chr17 | 49719501  | 49721500  | Down     | -1.23 | 6.62E-07 | 0.000299 | Intergenic |            |
| chrX  | 129136501 | 129140200 | Down     | -1.23 | 7.17E-07 | 0.000311 | Intergenic |            |
| chr2  | 1433201   | 1435300   | Down     | -1.23 | 9.34E-07 | 0.000373 | Intergenic |            |
| chr16 | 11868701  | 11870400  | Down     | -1.23 | 9.62E-07 | 0.00038  | Intergenic |            |
| chr19 | 45446501  | 45447500  | Down     | -1.23 | 9.77E-07 | 0.000384 | Intergenic |            |
| chr6  | 139839301 | 139844200 | Down     | -1.23 | 1.24E-06 | 0.000447 | Intergenic |            |
| chr19 | 57008801  | 57009800  | Down     | -1.23 | 1.58E-06 | 0.000521 | Intergenic |            |
| chr4  | 100213701 | 100215700 | Down     | -1.23 | 2.48E-06 | 0.000696 | Intergenic |            |
| chrX  | 128916501 | 128919500 | Down     | -1.23 | 2.72E-06 | 0.000743 | Intergenic |            |
| chr17 | 49667701  | 49673000  | Down     | -1.23 | 3.12E-06 | 0.000822 | Intergenic |            |
| chr17 | 49580001  | 49583300  | Down     | -1.23 | 3.77E-06 | 0.000943 | Intergenic |            |
| chr2  | 408301    | 416600    | Down     | -1.23 | 4.39E-06 | 0.001053 | Intergenic |            |
| chrX  | 116309501 | 116311800 | Down     | -1.23 | 6.98E-06 | 0.00149  | Intergenic |            |
| chr6  | 139805401 | 139810100 | Down     | -1.23 | 7.32E-06 | 0.001537 | Intergenic |            |
| chrX  | 128933901 | 128935000 | Down     | -1.23 | 8.75E-06 | 0.001767 | Intergenic |            |
| chr6  | 138849201 | 138850600 | Down     | -1.23 | 9.74E-06 | 0.001928 | Intergenic |            |
| chr20 | 36952001  | 36953600  | Down     | -1.23 | 1.06E-05 | 0.002053 | Intergenic |            |
| chr13 | 19170901  | 19176000  | Down     | -1.23 | 1.09E-05 | 0.002084 | Intergenic |            |
| chr14 | 44365501  | 44367500  | Down     | -1.23 | 1.12E-05 | 0.002126 | Intergenic |            |
| chr3  | 109375101 | 109376600 | Down     | -1.23 | 1.77E-05 | 0.002967 | Intergenic |            |
| chr1  | 176428201 | 176429200 | Down     | -1.23 | 1.90E-05 | 0.003118 | Intergenic |            |
| chr4  | 169964501 | 169965600 | Down     | -1.23 | 3.31E-05 | 0.004653 | Intergenic |            |
| chr2  | 35323601  | 35324600  | Down     | -1.23 | 3.47E-05 | 0.004826 | Intergenic |            |
| chr6  | 139769501 | 139770500 | Down     | -1.23 | 3.71E-05 | 0.005083 | Intergenic |            |
| chr1  | 48475001  | 48476000  | Down     | -1.23 | 5.82E-05 | 0.006967 | Intergenic |            |
| chr18 | 38728001  | 38747200  | Down     | -1.23 | 6.55E-05 | 0.007584 | Intergenic |            |
| chr1  | 47932101  | 47933400  | Down     | -1.23 | 8.68E-05 | 0.009183 | Intergenic |            |
| chrX  | 129780601 | 129782100 | Down     | -1.23 | 8.89E-05 | 0.009319 | Intergenic |            |
| chr3  | 29985101  | 29986200  | Down     | -1.23 | 0.00014  | 0.013724 | Intergenic |            |
| chr10 | 63079001  | 63080200  | Fndc3b   | Down  | -1.24    | 5.75E-06 | 0.001283   | Genebody   |
| chr1  | 243957201 | 243958900 | RGD15640 | Down  | -1.24    | 8.14E-06 | 0.001671   | Genebody   |
| chr14 | 28434601  | 28435700  | Capn13   | Down  | -1.24    | 1.11E-05 | 0.002112   | Genebody   |
| chr10 | 1624101   | 1625200   | Sult2a2  | Down  | -1.24    | 4.57E-05 | 0.005878   | Genebody   |
| chr15 | 5987801   | 5988900   | Bbox1    | Down  | -1.24    | 6.70E-05 | 0.007711   | Genebody   |
| chr1  | 75003001  | 75004000  | Tasp1    | Down  | -1.24    | 8.55E-05 | 0.009093   | Genebody   |
| chrX  | 129588101 | 129589700 |          | Down  | -1.24    | 3.51E-07 | 0.000212   | Intergenic |
| chr2  | 154426801 | 154428600 |          | Down  | -1.24    | 3.79E-07 | 0.000221   | Intergenic |
| chr11 | 81770101  | 81772000  |          | Down  | -1.24    | 3.98E-07 | 0.000227   | Intergenic |
| chr17 | 49235601  | 49238300  |          | Down  | -1.24    | 8.41E-07 | 0.000347   | Intergenic |
| chr8  | 42101801  | 42103300  |          | Down  | -1.24    | 1.04E-06 | 0.000398   | Intergenic |
| chr14 | 21532601  | 21534100  |          | Down  | -1.24    | 1.71E-06 | 0.000553   | Intergenic |
| chr17 | 50024401  | 50026300  |          | Down  | -1.24    | 2.03E-06 | 0.00061    | Intergenic |
| chr16 | 20883001  | 20885500  |          | Down  | -1.24    | 2.23E-06 | 0.000648   | Intergenic |
| chr6  | 138992001 | 138993300 |          | Down  | -1.24    | 2.32E-06 | 0.000668   | Intergenic |
| chr1  | 51318701  | 51319800  |          | Down  | -1.24    | 3.63E-06 | 0.000921   | Intergenic |

|       |           |           |           |      |       |          |          |            |
|-------|-----------|-----------|-----------|------|-------|----------|----------|------------|
| chrX  | 129656601 | 129660500 |           | Down | -1.24 | 4.26E-06 | 0.001029 | Intergenic |
| chr2  | 551501    | 558500    |           | Down | -1.24 | 4.78E-06 | 0.001123 | Intergenic |
| chr9  | 112738501 | 112739600 |           | Down | -1.24 | 5.92E-06 | 0.001312 | Intergenic |
| chrX  | 128948401 | 128957700 |           | Down | -1.24 | 7.67E-06 | 0.001595 | Intergenic |
| chr17 | 49466501  | 49469300  |           | Down | -1.24 | 8.52E-06 | 0.001735 | Intergenic |
| chrX  | 128973301 | 128974400 |           | Down | -1.24 | 1.29E-05 | 0.002345 | Intergenic |
| chr17 | 49680601  | 49685600  |           | Down | -1.24 | 1.49E-05 | 0.002618 | Intergenic |
| chr14 | 103106901 | 103109800 |           | Down | -1.24 | 1.55E-05 | 0.002696 | Intergenic |
| chr6  | 139779901 | 139781000 |           | Down | -1.24 | 1.88E-05 | 0.003094 | Intergenic |
| chr5  | 110623201 | 110624200 |           | Down | -1.24 | 2.61E-05 | 0.003924 | Intergenic |
| chr9  | 1232801   | 1234000   |           | Down | -1.24 | 2.97E-05 | 0.004313 | Intergenic |
| chr14 | 21893601  | 21894600  |           | Down | -1.24 | 6.00E-05 | 0.00712  | Intergenic |
| chr2  | 52023301  | 52024300  |           | Down | -1.24 | 6.99E-05 | 0.007925 | Intergenic |
| chr8  | 42129401  | 42130400  |           | Down | -1.24 | 6.99E-05 | 0.007927 | Intergenic |
| chr2  | 1292001   | 1293000   |           | Down | -1.24 | 7.37E-05 | 0.00823  | Intergenic |
| chr1  | 51098301  | 51099300  |           | Down | -1.24 | 7.45E-05 | 0.008255 | Intergenic |
| chrX  | 129237901 | 129238900 |           | Down | -1.24 | 8.81E-05 | 0.009277 | Intergenic |
| chr18 | 38768901  | 38803500  |           | Down | -1.24 | 0.000108 | 0.010789 | Intergenic |
| chr2  | 188549801 | 188551300 |           | Down | -1.24 | 0.000134 | 0.013156 | Intergenic |
| chr1  | 52783801  | 52785000  |           | Down | -1.24 | 0.000392 | 0.037164 | Intergenic |
| chr1  | 48275401  | 48277000  |           | Down | -1.24 | 0.000501 | 0.047299 | Intergenic |
| chr2  | 204313501 | 204314600 | Sult1c2a  | Down | -1.25 | 2.42E-07 | 0.000174 | Genebody   |
| chr6  | 122805801 | 122806900 | Tph2      | Down | -1.25 | 1.24E-05 | 0.002285 | Genebody   |
| chr9  | 63193801  | 63195100  | LOC300308 | Down | -1.25 | 3.29E-05 | 0.004644 | Genebody   |
| chr11 | 64703301  | 64704300  | Col4a3bp  | Down | -1.25 | 3.45E-05 | 0.004806 | Genebody   |
| chr20 | 40894501  | 40895800  | Sult2a2   | Down | -1.25 | 5.86E-05 | 0.006998 | Genebody   |
| chr10 | 83505301  | 83507200  |           | Down | -1.25 | 7.40E-08 | 6.81E-05 | Intergenic |
| chr2  | 207238201 | 207240100 |           | Down | -1.25 | 1.54E-07 | 0.000127 | Intergenic |
| chr7  | 18435401  | 18438000  |           | Down | -1.25 | 2.58E-07 | 0.000176 | Intergenic |
| chr6  | 138938801 | 138941000 |           | Down | -1.25 | 6.74E-07 | 0.000301 | Intergenic |
| chr2  | 154314001 | 154316400 |           | Down | -1.25 | 8.15E-07 | 0.000339 | Intergenic |
| chr16 | 37896601  | 37902200  |           | Down | -1.25 | 1.25E-06 | 0.00045  | Intergenic |
| chr8  | 39875701  | 39879100  |           | Down | -1.25 | 1.55E-06 | 0.000518 | Intergenic |
| chr8  | 90437501  | 90439400  |           | Down | -1.25 | 1.55E-06 | 0.000518 | Intergenic |
| chr17 | 49702601  | 49706800  |           | Down | -1.25 | 1.71E-06 | 0.000553 | Intergenic |
| chr16 | 14537101  | 14539000  |           | Down | -1.25 | 2.37E-06 | 0.000673 | Intergenic |
| chr8  | 40027001  | 40028200  |           | Down | -1.25 | 4.12E-06 | 0.001006 | Intergenic |
| chr17 | 49575701  | 49579600  |           | Down | -1.25 | 4.26E-06 | 0.001029 | Intergenic |
| chr6  | 139492201 | 139494100 |           | Down | -1.25 | 5.23E-06 | 0.001194 | Intergenic |
| chr1  | 230810201 | 230811300 |           | Down | -1.25 | 5.85E-06 | 0.001299 | Intergenic |
| chr6  | 139905801 | 139906800 |           | Down | -1.25 | 6.62E-06 | 0.00143  | Intergenic |
| chr17 | 49561701  | 49563000  |           | Down | -1.25 | 7.50E-06 | 0.00157  | Intergenic |
| chr3  | 138071501 | 138072600 |           | Down | -1.25 | 7.69E-06 | 0.001599 | Intergenic |
| chr16 | 39238401  | 39242900  |           | Down | -1.25 | 1.51E-05 | 0.002644 | Intergenic |
| chr16 | 27541801  | 27543300  |           | Down | -1.25 | 1.81E-05 | 0.003027 | Intergenic |
| chr3  | 16976701  | 16977900  |           | Down | -1.25 | 1.95E-05 | 0.003188 | Intergenic |
| chr6  | 139002401 | 139006700 |           | Down | -1.25 | 2.02E-05 | 0.003276 | Intergenic |
| chr6  | 2813701   | 2814700   |           | Down | -1.25 | 2.07E-05 | 0.003343 | Intergenic |

|       |           |           |          |      |       |          |          |            |
|-------|-----------|-----------|----------|------|-------|----------|----------|------------|
| chr1  | 111392201 | 111393500 |          | Down | -1.25 | 2.15E-05 | 0.003433 | Intergenic |
| chr1  | 49016201  | 49017200  |          | Down | -1.25 | 3.17E-05 | 0.004508 | Intergenic |
| chr6  | 138864001 | 138865300 |          | Down | -1.25 | 3.97E-05 | 0.005322 | Intergenic |
| chr2  | 156716301 | 156718000 |          | Down | -1.25 | 4.98E-05 | 0.006237 | Intergenic |
| chr16 | 21600601  | 21601700  |          | Down | -1.25 | 5.02E-05 | 0.006272 | Intergenic |
| chr1  | 48270101  | 48271100  |          | Down | -1.25 | 5.53E-05 | 0.006733 | Intergenic |
| chr20 | 38440001  | 38441200  |          | Down | -1.25 | 5.77E-05 | 0.006936 | Intergenic |
| chr14 | 49496001  | 49497000  |          | Down | -1.25 | 5.96E-05 | 0.007083 | Intergenic |
| chr18 | 38704101  | 38727500  |          | Down | -1.25 | 6.38E-05 | 0.007443 | Intergenic |
| chr1  | 111695001 | 111696000 |          | Down | -1.25 | 6.42E-05 | 0.007471 | Intergenic |
| chr14 | 49702201  | 49703200  |          | Down | -1.25 | 6.84E-05 | 0.007814 | Intergenic |
| chrX  | 18123501  | 18124800  |          | Down | -1.25 | 7.11E-05 | 0.008031 | Intergenic |
| chr2  | 154403001 | 154404400 |          | Down | -1.25 | 7.14E-05 | 0.008051 | Intergenic |
| chr1  | 112585601 | 112586600 |          | Down | -1.25 | 9.08E-05 | 0.00947  | Intergenic |
| chr6  | 139471801 | 139473700 |          | Down | -1.25 | 0.000179 | 0.01743  | Intergenic |
| chr16 | 73862101  | 73863100  | Slc25a46 | Down | -1.26 | 4.61E-06 | 0.001094 | 3k promote |
| chr13 | 51340601  | 51341800  | Sult2a2  | Down | -1.26 | 1.16E-05 | 0.002181 | Genebody   |
| chr5  | 6558401   | 6560400   | Sult2a2  | Down | -1.26 | 2.84E-05 | 0.004178 | Genebody   |
| chr5  | 101792501 | 101793500 | Dip2c    | Down | -1.26 | 5.49E-05 | 0.006688 | Genebody   |
| chr7  | 19070201  | 19071200  | Sult2a2  | Down | -1.26 | 6.71E-05 | 0.007717 | Genebody   |
| chrX  | 24450601  | 24452500  |          | Down | -1.26 | 1.77E-07 | 0.000139 | Intergenic |
| chrX  | 129866301 | 129867600 |          | Down | -1.26 | 7.09E-07 | 0.00031  | Intergenic |
| chrX  | 129589801 | 129593600 |          | Down | -1.26 | 7.39E-07 | 0.000318 | Intergenic |
| chr6  | 139836101 | 139838500 |          | Down | -1.26 | 1.13E-06 | 0.000419 | Intergenic |
| chrX  | 129047601 | 129049600 |          | Down | -1.26 | 1.52E-06 | 0.000512 | Intergenic |
| chr6  | 83887901  | 83889300  |          | Down | -1.26 | 2.35E-06 | 0.000671 | Intergenic |
| chr6  | 139248101 | 139249200 |          | Down | -1.26 | 3.19E-06 | 0.000837 | Intergenic |
| chr13 | 19120701  | 19127000  |          | Down | -1.26 | 3.84E-06 | 0.000955 | Intergenic |
| chr4  | 57772801  | 57774000  |          | Down | -1.26 | 5.34E-06 | 0.001212 | Intergenic |
| chr17 | 49469401  | 49475700  |          | Down | -1.26 | 5.37E-06 | 0.001216 | Intergenic |
| chrX  | 51078801  | 51080700  |          | Down | -1.26 | 5.81E-06 | 0.001293 | Intergenic |
| chr1  | 52877701  | 52879600  |          | Down | -1.26 | 7.38E-06 | 0.001547 | Intergenic |
| chr4  | 46497301  | 46499600  |          | Down | -1.26 | 8.58E-06 | 0.001741 | Intergenic |
| chr14 | 49598401  | 49599700  |          | Down | -1.26 | 1.11E-05 | 0.002112 | Intergenic |
| chr6  | 139419601 | 139423100 |          | Down | -1.26 | 1.18E-05 | 0.002203 | Intergenic |
| chr2  | 127755301 | 127756500 |          | Down | -1.26 | 1.70E-05 | 0.002892 | Intergenic |
| chr7  | 19503601  | 19504700  |          | Down | -1.26 | 1.72E-05 | 0.002914 | Intergenic |
| chr11 | 9575701   | 9577700   |          | Down | -1.26 | 1.77E-05 | 0.002973 | Intergenic |
| chrX  | 129404601 | 129406000 |          | Down | -1.26 | 1.97E-05 | 0.003213 | Intergenic |
| chr13 | 30491601  | 30494300  |          | Down | -1.26 | 2.32E-05 | 0.003627 | Intergenic |
| chr13 | 19127301  | 19129200  |          | Down | -1.26 | 2.47E-05 | 0.003792 | Intergenic |
| chr14 | 49127201  | 49128200  |          | Down | -1.26 | 2.77E-05 | 0.004092 | Intergenic |
| chr16 | 30923701  | 30926200  |          | Down | -1.26 | 3.13E-05 | 0.004479 | Intergenic |
| chr20 | 47397401  | 47398400  |          | Down | -1.26 | 3.80E-05 | 0.005155 | Intergenic |
| chr8  | 42232001  | 42233000  |          | Down | -1.26 | 3.82E-05 | 0.005175 | Intergenic |
| chr18 | 69954401  | 69955500  |          | Down | -1.26 | 3.87E-05 | 0.005229 | Intergenic |
| chr16 | 22049901  | 22050900  |          | Down | -1.26 | 5.00E-05 | 0.006254 | Intergenic |
| chr15 | 4750301   | 4751300   |          | Down | -1.26 | 6.95E-05 | 0.007899 | Intergenic |

|       |           |           |           |      |       |          |          |            |
|-------|-----------|-----------|-----------|------|-------|----------|----------|------------|
| chr7  | 62778801  | 62779800  |           | Down | -1.26 | 7.84E-05 | 0.008539 | Intergenic |
| chr6  | 139215901 | 139216900 |           | Down | -1.26 | 8.45E-05 | 0.009028 | Intergenic |
| chr9  | 805001    | 806000    |           | Down | -1.26 | 9.32E-05 | 0.009615 | Intergenic |
| chr7  | 140667301 | 140668300 |           | Down | -1.26 | 9.87E-05 | 0.009986 | Intergenic |
| chr3  | 95366701  | 95368500  | Snupn     | Down | -1.27 | 4.37E-05 | 0.005709 | 3k promote |
| chr1  | 101703401 | 101705300 | Lrrc16a   | Down | -1.27 | 1.05E-06 | 0.000401 | Genebody   |
| chr4  | 167575501 | 167577300 | LOC300308 | Down | -1.27 | 1.10E-05 | 0.002109 | Genebody   |
| chr3  | 87580301  | 87581300  | Ash1l     | Down | -1.27 | 1.45E-05 | 0.002553 | Genebody   |
| chr17 | 47930001  | 47932000  | Cab39     | Down | -1.27 | 4.15E-05 | 0.00551  | Genebody   |
| chr3  | 148476901 | 148477900 | Spata7    | Down | -1.27 | 9.60E-05 | 0.009785 | Genebody   |
| chr13 | 102893701 | 102895000 |           | Down | -1.27 | 1.22E-07 | 0.000105 | Intergenic |
| chr2  | 154316501 | 154319000 |           | Down | -1.27 | 4.60E-07 | 0.000244 | Intergenic |
| chr16 | 30917001  | 30919300  |           | Down | -1.27 | 4.98E-07 | 0.000254 | Intergenic |
| chr16 | 37870601  | 37872900  |           | Down | -1.27 | 6.16E-07 | 0.000286 | Intergenic |
| chr16 | 21309501  | 21312900  |           | Down | -1.27 | 9.37E-07 | 0.000373 | Intergenic |
| chrX  | 130294801 | 130295800 |           | Down | -1.27 | 1.28E-06 | 0.000456 | Intergenic |
| chr2  | 188531301 | 188533400 |           | Down | -1.27 | 1.31E-06 | 0.000461 | Intergenic |
| chr10 | 103261101 | 103262400 |           | Down | -1.27 | 1.76E-06 | 0.000563 | Intergenic |
| chr1  | 130483901 | 130485400 |           | Down | -1.27 | 2.36E-06 | 0.000671 | Intergenic |
| chr15 | 49620901  | 49622200  |           | Down | -1.27 | 3.06E-06 | 0.000813 | Intergenic |
| chr6  | 139453001 | 139454200 |           | Down | -1.27 | 3.72E-06 | 0.000936 | Intergenic |
| chr1  | 50682001  | 50683000  |           | Down | -1.27 | 5.14E-06 | 0.001179 | Intergenic |
| chr4  | 49618601  | 49622300  |           | Down | -1.27 | 5.95E-06 | 0.001318 | Intergenic |
| chr13 | 19139601  | 19143800  |           | Down | -1.27 | 8.44E-06 | 0.001722 | Intergenic |
| chrX  | 129804201 | 129816000 |           | Down | -1.27 | 8.61E-06 | 0.001746 | Intergenic |
| chr1  | 52012701  | 52013900  |           | Down | -1.27 | 9.28E-06 | 0.001856 | Intergenic |
| chr6  | 139076001 | 139078000 |           | Down | -1.27 | 1.01E-05 | 0.001977 | Intergenic |
| chr6  | 138943401 | 138946000 |           | Down | -1.27 | 1.01E-05 | 0.001982 | Intergenic |
| chr17 | 49453201  | 49458800  |           | Down | -1.27 | 1.07E-05 | 0.002066 | Intergenic |
| chr17 | 49673701  | 49674700  |           | Down | -1.27 | 1.70E-05 | 0.002892 | Intergenic |
| chr16 | 21324101  | 21327300  |           | Down | -1.27 | 1.74E-05 | 0.002943 | Intergenic |
| chr8  | 26593901  | 26594900  |           | Down | -1.27 | 2.19E-05 | 0.003479 | Intergenic |
| chrX  | 128861101 | 128862100 |           | Down | -1.27 | 2.86E-05 | 0.0042   | Intergenic |
| chr17 | 52637301  | 52638400  |           | Down | -1.27 | 3.05E-05 | 0.004401 | Intergenic |
| chr3  | 17099001  | 17100000  |           | Down | -1.27 | 3.37E-05 | 0.004715 | Intergenic |
| chr17 | 49555701  | 49558700  |           | Down | -1.27 | 4.33E-05 | 0.005668 | Intergenic |
| chr17 | 49553401  | 49554900  |           | Down | -1.27 | 6.29E-05 | 0.007359 | Intergenic |
| chr1  | 803101    | 804100    |           | Down | -1.27 | 6.65E-05 | 0.007665 | Intergenic |
| chr1  | 5150601   | 5151700   |           | Down | -1.27 | 8.38E-05 | 0.008974 | Intergenic |
| chr1  | 111389601 | 111390900 |           | Down | -1.27 | 0.000126 | 0.012449 | Intergenic |
| chr6  | 139320501 | 139323200 |           | Down | -1.27 | 0.000139 | 0.01369  | Intergenic |
| chrX  | 130088501 | 130089800 |           | Down | -1.27 | 0.000254 | 0.024453 | Intergenic |
| chr2  | 25176601  | 25177600  | Otp       | Down | -1.28 | 5.57E-05 | 0.006761 | 1k promote |
| chr7  | 19243201  | 19245000  | Cyp2c7    | Down | -1.28 | 1.86E-05 | 0.003084 | Genebody   |
| chr7  | 54340301  | 54341400  | Sult2a2   | Down | -1.28 | 2.10E-05 | 0.003384 | Genebody   |
| chr14 | 17593901  | 17595200  |           | Down | -1.28 | 7.26E-08 | 6.74E-05 | Intergenic |
| chr15 | 65963301  | 65965200  |           | Down | -1.28 | 1.76E-07 | 0.000139 | Intergenic |
| chr16 | 27604401  | 27606600  |           | Down | -1.28 | 3.77E-07 | 0.00022  | Intergenic |



|       |           |           |          |       |          |          |            |          |
|-------|-----------|-----------|----------|-------|----------|----------|------------|----------|
| chr2  | 154389901 | 154391400 | Down     | -1.28 | 3.95E-07 | 0.000227 | Intergenic |          |
| chr1  | 97213201  | 97215100  | Down     | -1.28 | 6.85E-07 | 0.000304 | Intergenic |          |
| chr6  | 139834801 | 139835800 | Down     | -1.28 | 1.18E-06 | 0.000434 | Intergenic |          |
| chr17 | 40165301  | 40167200  | Down     | -1.28 | 1.31E-06 | 0.000461 | Intergenic |          |
| chr5  | 60972501  | 60973500  | Down     | -1.28 | 2.16E-06 | 0.000635 | Intergenic |          |
| chr8  | 39885001  | 39886200  | Down     | -1.28 | 2.23E-06 | 0.000649 | Intergenic |          |
| chr14 | 48738601  | 48742200  | Down     | -1.28 | 2.67E-06 | 0.000733 | Intergenic |          |
| chr4  | 102523201 | 102524600 | Down     | -1.28 | 2.68E-06 | 0.000735 | Intergenic |          |
| chr20 | 38277501  | 38278800  | Down     | -1.28 | 4.29E-06 | 0.001035 | Intergenic |          |
| chrX  | 129817101 | 129821000 | Down     | -1.28 | 4.42E-06 | 0.001058 | Intergenic |          |
| chr2  | 180201    | 185600    | Down     | -1.28 | 4.88E-06 | 0.001133 | Intergenic |          |
| chr2  | 1243101   | 1244500   | Down     | -1.28 | 6.17E-06 | 0.001349 | Intergenic |          |
| chr17 | 49460101  | 49466400  | Down     | -1.28 | 6.50E-06 | 0.001409 | Intergenic |          |
| chr2  | 187230701 | 187231700 | Down     | -1.28 | 6.54E-06 | 0.001414 | Intergenic |          |
| chr17 | 49612201  | 49620400  | Down     | -1.28 | 8.15E-06 | 0.001672 | Intergenic |          |
| chrX  | 129579101 | 129580200 | Down     | -1.28 | 1.26E-05 | 0.002312 | Intergenic |          |
| chr16 | 20866301  | 20867300  | Down     | -1.28 | 2.07E-05 | 0.003344 | Intergenic |          |
| chr17 | 49326201  | 49337600  | Down     | -1.28 | 2.42E-05 | 0.003746 | Intergenic |          |
| chrX  | 8362301   | 8364400   | Down     | -1.28 | 3.31E-05 | 0.004653 | Intergenic |          |
| chr3  | 166855801 | 166856800 | Down     | -1.28 | 3.33E-05 | 0.004674 | Intergenic |          |
| chr14 | 49146201  | 49147200  | Down     | -1.28 | 4.20E-05 | 0.005559 | Intergenic |          |
| chr8  | 40148401  | 40149400  | Down     | -1.28 | 6.67E-05 | 0.007685 | Intergenic |          |
| chr16 | 27679001  | 27680000  | Down     | -1.28 | 7.70E-05 | 0.008449 | Intergenic |          |
| chr10 | 58544901  | 58545900  | Down     | -1.28 | 7.81E-05 | 0.008528 | Intergenic |          |
| chr6  | 140917701 | 140918700 | Down     | -1.28 | 8.39E-05 | 0.008977 | Intergenic |          |
| chr13 | 19183101  | 19224000  | Down     | -1.28 | 0.000123 | 0.012208 | Intergenic |          |
| chr10 | 58885701  | 58886700  | Kcnip4   | Down  | -1.29    | 2.29E-07 | 0.000167   | Genebody |
| chr10 | 68735901  | 68736900  | Sult1c2a | Down  | -1.29    | 5.95E-06 | 0.001318   | Genebody |
| chr1  | 187203101 | 187204100 | Fstl1    | Down  | -1.29    | 1.98E-05 | 0.003222   | Genebody |
| chr6  | 139541601 | 139544700 | Down     | -1.29 | 1.17E-07 | 0.000102 | Intergenic |          |
| chr14 | 30758901  | 30760100  | Down     | -1.29 | 1.25E-07 | 0.000107 | Intergenic |          |
| chr6  | 138825601 | 138827400 | Down     | -1.29 | 1.38E-07 | 0.000117 | Intergenic |          |
| chr1  | 182968001 | 182969900 | Down     | -1.29 | 2.55E-07 | 0.000175 | Intergenic |          |
| chr16 | 27006401  | 27008300  | Down     | -1.29 | 3.54E-07 | 0.000212 | Intergenic |          |
| chr16 | 21169501  | 21170500  | Down     | -1.29 | 5.30E-07 | 0.000266 | Intergenic |          |
| chr17 | 49246701  | 49249000  | Down     | -1.29 | 8.48E-07 | 0.000348 | Intergenic |          |
| chr17 | 49228401  | 49231200  | Down     | -1.29 | 1.76E-06 | 0.000563 | Intergenic |          |
| chr6  | 139995801 | 139997000 | Down     | -1.29 | 1.79E-06 | 0.000567 | Intergenic |          |
| chr17 | 50013001  | 50017000  | Down     | -1.29 | 2.23E-06 | 0.000648 | Intergenic |          |
| chrX  | 129651001 | 129653800 | Down     | -1.29 | 2.34E-06 | 0.000671 | Intergenic |          |
| chr2  | 221528301 | 221529300 | Down     | -1.29 | 2.66E-06 | 0.000731 | Intergenic |          |
| chr10 | 1677501   | 1679000   | Down     | -1.29 | 3.58E-06 | 0.000909 | Intergenic |          |
| chr14 | 34001     | 35200     | Down     | -1.29 | 4.33E-06 | 0.00104  | Intergenic |          |
| chr19 | 37653301  | 37654600  | Down     | -1.29 | 5.36E-06 | 0.001215 | Intergenic |          |
| chrX  | 130263801 | 130265500 | Down     | -1.29 | 7.15E-06 | 0.001515 | Intergenic |          |
| chr17 | 49299001  | 49312000  | Down     | -1.29 | 9.66E-06 | 0.001916 | Intergenic |          |
| chr1  | 111687701 | 111689200 | Down     | -1.29 | 1.08E-05 | 0.002077 | Intergenic |          |
| chr1  | 190908801 | 190909900 | Down     | -1.29 | 1.34E-05 | 0.00241  | Intergenic |          |

|       |           |           |           |      |       |          |          |            |
|-------|-----------|-----------|-----------|------|-------|----------|----------|------------|
| chr19 | 34866401  | 34869600  |           | Down | -1.29 | 1.96E-05 | 0.003193 | Intergenic |
| chr3  | 138120501 | 138121500 |           | Down | -1.29 | 2.15E-05 | 0.003433 | Intergenic |
| chr17 | 72422501  | 72423500  |           | Down | -1.29 | 2.33E-05 | 0.003634 | Intergenic |
| chr16 | 30941701  | 30942700  |           | Down | -1.29 | 2.87E-05 | 0.00421  | Intergenic |
| chr3  | 138099201 | 138100300 |           | Down | -1.29 | 3.85E-05 | 0.005211 | Intergenic |
| chr1  | 111146601 | 111147600 |           | Down | -1.29 | 4.38E-05 | 0.005718 | Intergenic |
| chr16 | 21297801  | 21298900  |           | Down | -1.29 | 4.94E-05 | 0.00622  | Intergenic |
| chr14 | 49761301  | 49762300  |           | Down | -1.29 | 4.96E-05 | 0.006228 | Intergenic |
| chr12 | 18275001  | 18276300  |           | Down | -1.29 | 5.48E-05 | 0.006684 | Intergenic |
| chr6  | 138860801 | 138861800 |           | Down | -1.29 | 6.03E-05 | 0.007139 | Intergenic |
| chr1  | 229962601 | 229963600 |           | Down | -1.29 | 6.81E-05 | 0.0078   | Intergenic |
| chr13 | 30423601  | 30452900  |           | Down | -1.29 | 8.93E-05 | 0.009348 | Intergenic |
| chr1  | 141728401 | 141729400 |           | Down | -1.29 | 9.44E-05 | 0.009695 | Intergenic |
| chr18 | 24020101  | 24021100  | Npepps    | Down | -1.3  | 1.22E-05 | 0.002244 | 3k promote |
| chr1  | 75063501  | 75064500  | Frem1     | Down | -1.3  | 6.77E-06 | 0.001453 | Genebody   |
| chr15 | 6196001   | 6197000   | LOC300308 | Down | -1.3  | 1.71E-05 | 0.002897 | Genebody   |
| chr1  | 112606601 | 112608500 |           | Down | -1.3  | 7.85E-08 | 7.17E-05 | Intergenic |
| chr16 | 37902301  | 37903700  |           | Down | -1.3  | 1.20E-07 | 0.000104 | Intergenic |
| chr3  | 138036301 | 138038900 |           | Down | -1.3  | 2.51E-07 | 0.000175 | Intergenic |
| chr3  | 11392201  | 11393300  |           | Down | -1.3  | 4.14E-07 | 0.000232 | Intergenic |
| chr2  | 1262701   | 1264100   |           | Down | -1.3  | 4.54E-07 | 0.000242 | Intergenic |
| chr13 | 82957201  | 82959100  |           | Down | -1.3  | 5.57E-07 | 0.000274 | Intergenic |
| chr3  | 73891701  | 73893700  |           | Down | -1.3  | 6.26E-07 | 0.000289 | Intergenic |
| chr16 | 37866701  | 37870500  |           | Down | -1.3  | 8.06E-07 | 0.000336 | Intergenic |
| chr18 | 58093301  | 58094400  |           | Down | -1.3  | 8.72E-07 | 0.000354 | Intergenic |
| chr7  | 5939501   | 5944300   |           | Down | -1.3  | 8.89E-07 | 0.00036  | Intergenic |
| chr6  | 138907601 | 138909500 |           | Down | -1.3  | 1.01E-06 | 0.000391 | Intergenic |
| chr14 | 88598501  | 88599600  |           | Down | -1.3  | 1.06E-06 | 0.000402 | Intergenic |
| chr1  | 53001801  | 53003200  |           | Down | -1.3  | 3.08E-06 | 0.000815 | Intergenic |
| chr14 | 704301    | 705500    |           | Down | -1.3  | 4.04E-06 | 0.000992 | Intergenic |
| chr6  | 139496201 | 139497700 |           | Down | -1.3  | 5.03E-06 | 0.001158 | Intergenic |
| chr12 | 45001     | 46100     |           | Down | -1.3  | 8.54E-06 | 0.001737 | Intergenic |
| chr17 | 22784201  | 22785200  |           | Down | -1.3  | 9.81E-06 | 0.001932 | Intergenic |
| chrX  | 129821301 | 129825000 |           | Down | -1.3  | 1.34E-05 | 0.002408 | Intergenic |
| chr2  | 154336001 | 154337000 |           | Down | -1.3  | 2.30E-05 | 0.003607 | Intergenic |
| chr20 | 38374601  | 38375700  |           | Down | -1.3  | 2.34E-05 | 0.003641 | Intergenic |
| chr6  | 139466801 | 139471600 |           | Down | -1.3  | 3.11E-05 | 0.004454 | Intergenic |
| chr17 | 49567601  | 49569300  |           | Down | -1.3  | 4.00E-05 | 0.005345 | Intergenic |
| chr13 | 107548301 | 107549300 |           | Down | -1.3  | 4.51E-05 | 0.005842 | Intergenic |
| chr6  | 5434001   | 5435200   |           | Down | -1.3  | 4.59E-05 | 0.005903 | Intergenic |
| chr12 | 41480201  | 41482300  |           | Down | -1.3  | 4.65E-05 | 0.005958 | Intergenic |
| chr8  | 81473301  | 81474300  |           | Down | -1.3  | 4.96E-05 | 0.006228 | Intergenic |
| chr6  | 139702801 | 139703800 |           | Down | -1.3  | 5.05E-05 | 0.006299 | Intergenic |
| chr16 | 27391201  | 27392200  |           | Down | -1.3  | 5.94E-05 | 0.007075 | Intergenic |
| chr13 | 30461101  | 30491100  |           | Down | -1.3  | 8.55E-05 | 0.009093 | Intergenic |
| chr19 | 23289001  | 23290300  |           | Down | -1.3  | 0.000308 | 0.029309 | Intergenic |
| chr1  | 179820101 | 179821100 | Spetex-2C | Down | -1.31 | 6.07E-06 | 0.001333 | Genebody   |
| chr20 | 21346501  | 21347700  | Trim44    | Down | -1.31 | 2.37E-05 | 0.003684 | Genebody   |

|       |           |           |         |       |          |          |            |          |
|-------|-----------|-----------|---------|-------|----------|----------|------------|----------|
| chr14 | 48536401  | 48538200  | Down    | -1.31 | 4.93E-07 | 0.000253 | Intergenic |          |
| chr1  | 243617501 | 243620900 | Down    | -1.31 | 5.73E-07 | 0.000277 | Intergenic |          |
| chr7  | 3337601   | 3340600   | Down    | -1.31 | 9.37E-07 | 0.000373 | Intergenic |          |
| chr15 | 92004401  | 92005800  | Down    | -1.31 | 1.43E-06 | 0.000488 | Intergenic |          |
| chr14 | 48773701  | 48777100  | Down    | -1.31 | 2.20E-06 | 0.000642 | Intergenic |          |
| chr5  | 109519201 | 109520200 | Down    | -1.31 | 2.49E-06 | 0.000696 | Intergenic |          |
| chr16 | 30414201  | 30416100  | Down    | -1.31 | 3.50E-06 | 0.000898 | Intergenic |          |
| chr15 | 31145801  | 31146900  | Down    | -1.31 | 6.02E-06 | 0.001325 | Intergenic |          |
| chr14 | 48742301  | 48748100  | Down    | -1.31 | 6.15E-06 | 0.001347 | Intergenic |          |
| chr3  | 166844101 | 166845100 | Down    | -1.31 | 7.84E-06 | 0.001623 | Intergenic |          |
| chr6  | 93667101  | 93669300  | Down    | -1.31 | 1.18E-05 | 0.002198 | Intergenic |          |
| chr2  | 154431801 | 154433500 | Down    | -1.31 | 1.19E-05 | 0.002213 | Intergenic |          |
| chr4  | 99827501  | 99828500  | Down    | -1.31 | 1.23E-05 | 0.002267 | Intergenic |          |
| chr14 | 49683701  | 49685300  | Down    | -1.31 | 1.25E-05 | 0.002296 | Intergenic |          |
| chr13 | 19162501  | 19168400  | Down    | -1.31 | 1.72E-05 | 0.002913 | Intergenic |          |
| chr13 | 30453201  | 30461000  | Down    | -1.31 | 1.81E-05 | 0.003027 | Intergenic |          |
| chr2  | 55979801  | 55980900  | Down    | -1.31 | 1.91E-05 | 0.003132 | Intergenic |          |
| chr1  | 51400001  | 51401000  | Down    | -1.31 | 2.40E-05 | 0.003729 | Intergenic |          |
| chr14 | 21521401  | 21522500  | Down    | -1.31 | 2.52E-05 | 0.003834 | Intergenic |          |
| chr17 | 72400801  | 72402000  | Down    | -1.31 | 2.54E-05 | 0.003847 | Intergenic |          |
| chr15 | 4622201   | 4623300   | Down    | -1.31 | 3.00E-05 | 0.004333 | Intergenic |          |
| chr6  | 138569001 | 138570000 | Down    | -1.31 | 3.01E-05 | 0.004341 | Intergenic |          |
| chr2  | 153172301 | 153173300 | Down    | -1.31 | 4.21E-05 | 0.00556  | Intergenic |          |
| chr3  | 137902701 | 137903700 | Down    | -1.31 | 4.30E-05 | 0.005649 | Intergenic |          |
| chr2  | 15901     | 16900     | Down    | -1.31 | 6.51E-05 | 0.007547 | Intergenic |          |
| chr13 | 102892301 | 102893300 | Down    | -1.31 | 9.94E-05 | 0.010033 | Intergenic |          |
| chr7  | 25246601  | 25248600  | Ly49i9  | Down  | -1.32    | 7.71E-08 | 7.06E-05   | Genebody |
| chr1  | 81276701  | 81277800  | Ctnnbl1 | Down  | -1.32    | 9.54E-05 | 0.009743   | Genebody |
| chr16 | 22019701  | 22021400  | Down    | -1.32 | 1.59E-07 | 0.00013  | Intergenic |          |
| chr2  | 154439101 | 154441100 | Down    | -1.32 | 3.11E-07 | 0.000199 | Intergenic |          |
| chr18 | 38803701  | 38807200  | Down    | -1.32 | 1.04E-06 | 0.000398 | Intergenic |          |
| chr1  | 50416901  | 50418100  | Down    | -1.32 | 1.25E-06 | 0.00045  | Intergenic |          |
| chr17 | 49640701  | 49647000  | Down    | -1.32 | 3.20E-06 | 0.000837 | Intergenic |          |
| chr2  | 60001     | 61700     | Down    | -1.32 | 3.57E-06 | 0.000909 | Intergenic |          |
| chr2  | 154424701 | 154425800 | Down    | -1.32 | 4.79E-06 | 0.001123 | Intergenic |          |
| chr19 | 34869801  | 34872300  | Down    | -1.32 | 6.01E-06 | 0.001325 | Intergenic |          |
| chr1  | 75810701  | 75811800  | Down    | -1.32 | 7.04E-06 | 0.0015   | Intergenic |          |
| chr9  | 806401    | 807400    | Down    | -1.32 | 7.19E-06 | 0.001517 | Intergenic |          |
| chr1  | 200336101 | 200338000 | Down    | -1.32 | 9.73E-06 | 0.001928 | Intergenic |          |
| chr17 | 49422301  | 49423800  | Down    | -1.32 | 9.76E-06 | 0.001928 | Intergenic |          |
| chr13 | 19147901  | 19153100  | Down    | -1.32 | 1.04E-05 | 0.002021 | Intergenic |          |
| chr3  | 106731501 | 106732500 | Down    | -1.32 | 1.05E-05 | 0.002029 | Intergenic |          |
| chr16 | 27286001  | 27287000  | Down    | -1.32 | 1.39E-05 | 0.002477 | Intergenic |          |
| chr8  | 87161801  | 87162800  | Down    | -1.32 | 1.86E-05 | 0.003081 | Intergenic |          |
| chr16 | 21489801  | 21491500  | Down    | -1.32 | 1.91E-05 | 0.003126 | Intergenic |          |
| chr14 | 21923301  | 21924300  | Down    | -1.32 | 1.99E-05 | 0.003239 | Intergenic |          |
| chr18 | 25052501  | 25053500  | Down    | -1.32 | 2.25E-05 | 0.003551 | Intergenic |          |
| chr5  | 75524501  | 75526700  | Down    | -1.32 | 2.25E-05 | 0.003554 | Intergenic |          |

|       |           |           |           |      |       |          |          |            |
|-------|-----------|-----------|-----------|------|-------|----------|----------|------------|
| chr13 | 30743101  | 30745600  |           | Down | -1.32 | 2.75E-05 | 0.004079 | Intergenic |
| chr1  | 110900701 | 110901700 |           | Down | -1.32 | 5.16E-05 | 0.006385 | Intergenic |
| chr20 | 36906201  | 36907200  |           | Down | -1.32 | 5.70E-05 | 0.006869 | Intergenic |
| chr17 | 49659801  | 49661700  |           | Down | -1.32 | 0.000131 | 0.01291  | Intergenic |
| chr6  | 139830101 | 139832500 |           | Down | -1.32 | 0.000186 | 0.018082 | Intergenic |
| chr6  | 139801301 | 139803000 |           | Down | -1.32 | 0.00025  | 0.024021 | Intergenic |
| chr1  | 74694801  | 74695800  | Aipl1     | Down | -1.33 | 1.62E-05 | 0.002782 | Genebody   |
| chr3  | 148550201 | 148552700 | Myo1d     | Down | -1.33 | 4.65E-05 | 0.005958 | Genebody   |
| chr10 | 82636401  | 82637400  | Hs3st5    | Down | -1.33 | 9.79E-05 | 0.009922 | Genebody   |
| chr6  | 58143801  | 58145700  |           | Down | -1.33 | 2.28E-07 | 0.000167 | Intergenic |
| chr17 | 72425201  | 72426700  |           | Down | -1.33 | 2.47E-07 | 0.000175 | Intergenic |
| chr14 | 49627101  | 49629800  |           | Down | -1.33 | 3.75E-07 | 0.000219 | Intergenic |
| chr18 | 38807701  | 38809300  |           | Down | -1.33 | 1.13E-06 | 0.000419 | Intergenic |
| chr13 | 30787301  | 30789200  |           | Down | -1.33 | 1.23E-06 | 0.000447 | Intergenic |
| chr9  | 62273701  | 62274700  |           | Down | -1.33 | 1.95E-06 | 0.000592 | Intergenic |
| chr17 | 49686801  | 49691000  |           | Down | -1.33 | 3.08E-06 | 0.000815 | Intergenic |
| chr5  | 107768101 | 107770300 |           | Down | -1.33 | 3.89E-06 | 0.000963 | Intergenic |
| chr4  | 166788901 | 166790100 |           | Down | -1.33 | 5.20E-06 | 0.001189 | Intergenic |
| chr6  | 139339701 | 139341300 |           | Down | -1.33 | 6.94E-06 | 0.001483 | Intergenic |
| chr13 | 19227101  | 19232100  |           | Down | -1.33 | 7.87E-06 | 0.001626 | Intergenic |
| chr14 | 49313601  | 49314600  |           | Down | -1.33 | 1.35E-05 | 0.002423 | Intergenic |
| chr6  | 139433001 | 139434900 |           | Down | -1.33 | 1.35E-05 | 0.002423 | Intergenic |
| chr4  | 17081601  | 17082600  |           | Down | -1.33 | 1.41E-05 | 0.002492 | Intergenic |
| chr16 | 21689001  | 21690100  |           | Down | -1.33 | 1.56E-05 | 0.002712 | Intergenic |
| chr3  | 835801    | 836800    |           | Down | -1.33 | 1.87E-05 | 0.003091 | Intergenic |
| chr1  | 240072001 | 240073100 |           | Down | -1.33 | 2.07E-05 | 0.003337 | Intergenic |
| chr1  | 48361001  | 48362000  |           | Down | -1.33 | 2.41E-05 | 0.003735 | Intergenic |
| chr13 | 19176701  | 19179500  |           | Down | -1.33 | 3.70E-05 | 0.005073 | Intergenic |
| chr8  | 40220001  | 40221000  |           | Down | -1.33 | 6.52E-05 | 0.007552 | Intergenic |
| chr20 | 38002501  | 38003500  |           | Down | -1.33 | 7.82E-05 | 0.008529 | Intergenic |
| chr1  | 61971701  | 61972700  | Kat8      | Down | -1.34 | 7.27E-08 | 6.74E-05 | Genebody   |
| chr8  | 84838301  | 84839300  | Sult2a2   | Down | -1.34 | 1.19E-07 | 0.000103 | Genebody   |
| chr12 | 18710601  | 18711600  | Akt3      | Down | -1.34 | 1.34E-05 | 0.002408 | Genebody   |
| chr1  | 203476601 | 203477800 | Sult2a2   | Down | -1.34 | 2.43E-05 | 0.003753 | Genebody   |
| chr1  | 141709901 | 141711100 | Spetex-2C | Down | -1.34 | 3.37E-05 | 0.004715 | Genebody   |
| chr1  | 74960701  | 74961800  | Cdr2      | Down | -1.34 | 3.54E-05 | 0.004896 | Genebody   |
| chr17 | 49325001  | 49326000  |           | Down | -1.34 | 3.44E-07 | 0.00021  | Intergenic |
| chr9  | 744401    | 745900    |           | Down | -1.34 | 3.55E-07 | 0.000212 | Intergenic |
| chr13 | 19137001  | 19139400  |           | Down | -1.34 | 4.21E-07 | 0.000233 | Intergenic |
| chr14 | 49100501  | 49101900  |           | Down | -1.34 | 5.74E-07 | 0.000277 | Intergenic |
| chr2  | 154301501 | 154304300 |           | Down | -1.34 | 7.46E-07 | 0.000319 | Intergenic |
| chr6  | 138410401 | 138411800 |           | Down | -1.34 | 8.32E-07 | 0.000344 | Intergenic |
| chr4  | 99847401  | 99849200  |           | Down | -1.34 | 1.04E-06 | 0.000398 | Intergenic |
| chrX  | 130247401 | 130248400 |           | Down | -1.34 | 1.59E-06 | 0.000524 | Intergenic |
| chr9  | 5495401   | 5496600   |           | Down | -1.34 | 1.67E-06 | 0.000544 | Intergenic |
| chr9  | 5544601   | 5545800   |           | Down | -1.34 | 2.33E-06 | 0.000669 | Intergenic |
| chrX  | 129243201 | 129247300 |           | Down | -1.34 | 2.58E-06 | 0.000717 | Intergenic |
| chr14 | 49169401  | 49171200  |           | Down | -1.34 | 4.45E-06 | 0.001061 | Intergenic |

|       |           |           |           |      |       |          |          |            |
|-------|-----------|-----------|-----------|------|-------|----------|----------|------------|
| chr15 | 26729801  | 26732200  |           | Down | -1.34 | 6.53E-06 | 0.001414 | Intergenic |
| chr19 | 29985001  | 29986000  |           | Down | -1.34 | 7.14E-06 | 0.001514 | Intergenic |
| chr16 | 21176901  | 21178000  |           | Down | -1.34 | 1.50E-05 | 0.002623 | Intergenic |
| chr6  | 139279401 | 139281100 |           | Down | -1.34 | 2.42E-05 | 0.003752 | Intergenic |
| chr1  | 244170701 | 244171900 | Pdxdc1    | Down | -1.35 | 1.73E-07 | 0.000138 | Genebody   |
| chr10 | 99879301  | 99881200  | Nup107    | Down | -1.35 | 2.36E-06 | 0.000671 | Genebody   |
| chr14 | 85140701  | 85141700  | Spetex-2C | Down | -1.35 | 1.16E-05 | 0.002175 | Genebody   |
| chr2  | 244998801 | 244999800 | Sult2a2   | Down | -1.35 | 5.66E-05 | 0.006837 | Genebody   |
| chr3  | 166997601 | 166999600 |           | Down | -1.35 | 2.84E-07 | 0.00019  | Intergenic |
| chr2  | 56701     | 58600     |           | Down | -1.35 | 3.55E-07 | 0.000212 | Intergenic |
| chr17 | 59300201  | 59302900  |           | Down | -1.35 | 3.60E-07 | 0.000214 | Intergenic |
| chr6  | 139429201 | 139430500 |           | Down | -1.35 | 3.63E-07 | 0.000215 | Intergenic |
| chr8  | 42233401  | 42234800  |           | Down | -1.35 | 6.32E-07 | 0.000291 | Intergenic |
| chr17 | 53550901  | 53551900  |           | Down | -1.35 | 1.43E-06 | 0.000488 | Intergenic |
| chr12 | 4534601   | 4536100   |           | Down | -1.35 | 1.83E-06 | 0.000571 | Intergenic |
| chr15 | 51748701  | 51750300  |           | Down | -1.35 | 4.43E-06 | 0.001059 | Intergenic |
| chr2  | 169901    | 171800    |           | Down | -1.35 | 6.45E-06 | 0.0014   | Intergenic |
| chr13 | 96209001  | 96210000  |           | Down | -1.35 | 7.04E-06 | 0.0015   | Intergenic |
| chr14 | 21544201  | 21545300  |           | Down | -1.35 | 1.04E-05 | 0.002029 | Intergenic |
| chrX  | 129050001 | 129052100 |           | Down | -1.35 | 1.96E-05 | 0.003197 | Intergenic |
| chr6  | 139357501 | 139360400 |           | Down | -1.35 | 2.02E-05 | 0.003271 | Intergenic |
| chr17 | 67917101  | 67918100  |           | Down | -1.35 | 2.12E-05 | 0.003405 | Intergenic |
| chr1  | 883001    | 884000    |           | Down | -1.35 | 5.89E-05 | 0.007031 | Intergenic |
| chr2  | 1413701   | 1414800   |           | Down | -1.35 | 6.50E-05 | 0.007547 | Intergenic |
| chr16 | 27710201  | 27711400  |           | Down | -1.35 | 9.70E-05 | 0.009847 | Intergenic |
| chr17 | 76974901  | 76975900  | Spetex-2C | Down | -1.36 | 2.36E-06 | 0.000671 | Genebody   |
| chr3  | 166384101 | 166385300 | Cyp2b1    | Down | -1.36 | 9.77E-06 | 0.001928 | Genebody   |
| chr15 | 5964801   | 5965900   | Spag9     | Down | -1.36 | 1.21E-05 | 0.002239 | Genebody   |
| chr20 | 45147101  | 45148100  | Cyp2c7    | Down | -1.36 | 1.64E-05 | 0.002808 | Genebody   |
| chr3  | 144930801 | 144931800 | Vom2r22   | Down | -1.36 | 1.87E-05 | 0.003088 | Genebody   |
| chr2  | 20053001  | 20054500  | Tmem30a   | Down | -1.36 | 4.04E-05 | 0.005389 | Genebody   |
| chr1  | 255861301 | 255862300 | Vom2r64   | Down | -1.36 | 7.74E-05 | 0.00848  | Genebody   |
| chr6  | 138998001 | 139000700 |           | Down | -1.36 | 2.24E-07 | 0.000166 | Intergenic |
| chr4  | 63370001  | 63371000  |           | Down | -1.36 | 2.35E-07 | 0.00017  | Intergenic |
| chr1  | 48329001  | 48330900  |           | Down | -1.36 | 2.53E-07 | 0.000175 | Intergenic |
| chr6  | 139036801 | 139038100 |           | Down | -1.36 | 3.38E-07 | 0.000209 | Intergenic |
| chr17 | 49637901  | 49639800  |           | Down | -1.36 | 6.71E-07 | 0.000301 | Intergenic |
| chr2  | 154324301 | 154325400 |           | Down | -1.36 | 1.22E-06 | 0.000445 | Intergenic |
| chrX  | 130049001 | 130050000 |           | Down | -1.36 | 1.68E-06 | 0.000548 | Intergenic |
| chr17 | 49675601  | 49679400  |           | Down | -1.36 | 1.72E-06 | 0.000556 | Intergenic |
| chrX  | 130525401 | 130529000 |           | Down | -1.36 | 1.73E-06 | 0.000557 | Intergenic |
| chr17 | 78008801  | 78010800  |           | Down | -1.36 | 1.96E-06 | 0.000592 | Intergenic |
| chr1  | 51548801  | 51550000  |           | Down | -1.36 | 2.55E-06 | 0.000709 | Intergenic |
| chr8  | 40265201  | 40266700  |           | Down | -1.36 | 4.26E-06 | 0.001029 | Intergenic |
| chr16 | 21479601  | 21480700  |           | Down | -1.36 | 1.15E-05 | 0.002164 | Intergenic |
| chr3  | 43825901  | 43826900  |           | Down | -1.36 | 1.22E-05 | 0.002246 | Intergenic |
| chr13 | 17943501  | 17944500  |           | Down | -1.36 | 1.95E-05 | 0.003181 | Intergenic |
| chr2  | 698501    | 699500    |           | Down | -1.36 | 3.43E-05 | 0.004793 | Intergenic |

|       |           |           |           |      |       |          |          |             |
|-------|-----------|-----------|-----------|------|-------|----------|----------|-------------|
| chr8  | 41796201  | 41797200  |           | Down | -1.36 | 3.72E-05 | 0.005086 | Intergenic  |
| chr14 | 93502301  | 93503300  |           | Down | -1.36 | 6.59E-05 | 0.007625 | Intergenic  |
| chr14 | 49494001  | 49495400  |           | Down | -1.36 | 0.000174 | 0.016994 | Intergenic  |
| chr8  | 60694801  | 60695800  | Aloxe3    | Down | -1.37 | 1.09E-05 | 0.002084 | 3k promote  |
| chr17 | 53606001  | 53607400  | Tnks      | Down | -1.37 | 1.63E-07 | 0.000132 | Genebody    |
| chr1  | 75076401  | 75077400  | Sult2a2   | Down | -1.37 | 2.14E-07 | 0.000161 | Genebody    |
| chr1  | 244093201 | 244094500 | LOC300308 | Down | -1.37 | 2.26E-07 | 0.000167 | Genebody    |
| chr4  | 27343801  | 27345000  |           | Down | -1.37 | 5.65E-08 | 5.38E-05 | Intergenic  |
| chr2  | 25521001  | 25522600  |           | Down | -1.37 | 3.89E-07 | 0.000225 | Intergenic  |
| chr17 | 49712301  | 49714600  |           | Down | -1.37 | 7.62E-07 | 0.000324 | Intergenic  |
| chr9  | 5541601   | 5542600   |           | Down | -1.37 | 2.00E-06 | 0.000603 | Intergenic  |
| chr1  | 111288801 | 111290000 |           | Down | -1.37 | 3.66E-06 | 0.000927 | Intergenic  |
| chr6  | 138681401 | 138682800 |           | Down | -1.37 | 4.18E-06 | 0.001017 | Intergenic  |
| chr16 | 14531101  | 14533000  |           | Down | -1.37 | 4.76E-06 | 0.001121 | Intergenic  |
| chr16 | 27577701  | 27578800  |           | Down | -1.37 | 4.86E-06 | 0.00113  | Intergenic  |
| chr1  | 112618101 | 112619100 |           | Down | -1.37 | 4.89E-06 | 0.001133 | Intergenic  |
| chr8  | 36815401  | 36816500  |           | Down | -1.37 | 6.02E-06 | 0.001325 | Intergenic  |
| chr1  | 52366301  | 52367300  |           | Down | -1.37 | 3.50E-05 | 0.004856 | Intergenic  |
| chr4  | 5142501   | 5143500   |           | Down | -1.37 | 4.50E-05 | 0.005829 | Intergenic  |
| chr15 | 4612601   | 4613600   |           | Down | -1.37 | 5.07E-05 | 0.006313 | Intergenic  |
| chr1  | 51029401  | 51030400  |           | Down | -1.37 | 7.43E-05 | 0.008255 | Intergenic  |
| chr2  | 1405201   | 1408300   |           | Down | -1.37 | 0.000107 | 0.010679 | Intergenic  |
| chr8  | 36844101  | 36845800  |           | Down | -1.37 | 0.000109 | 0.010882 | Intergenic  |
| chr1  | 73407601  | 73411800  | Vom1r56   | Down | -1.37 | 1.08E-06 | 0.000406 | proximal pr |
| chr7  | 57074501  | 57076000  | Spetex-2B | Down | -1.38 | 3.07E-07 | 0.000197 | Genebody    |
| chr5  | 61281801  | 61282800  | Amph      | Down | -1.38 | 1.31E-06 | 0.000461 | Genebody    |
| chr6  | 101471501 | 101472500 | Vom2r40   | Down | -1.38 | 6.70E-06 | 0.001444 | Genebody    |
| chr14 | 355401    | 357100    |           | Down | -1.38 | 2.51E-07 | 0.000175 | Intergenic  |
| chr2  | 183506501 | 183507900 |           | Down | -1.38 | 2.71E-07 | 0.000183 | Intergenic  |
| chr15 | 87926801  | 87928700  |           | Down | -1.38 | 2.81E-07 | 0.000188 | Intergenic  |
| chr14 | 49250701  | 49252400  |           | Down | -1.38 | 7.67E-07 | 0.000326 | Intergenic  |
| chr8  | 39908901  | 39912600  |           | Down | -1.38 | 9.19E-07 | 0.000368 | Intergenic  |
| chr9  | 104987901 | 104989900 |           | Down | -1.38 | 1.03E-06 | 0.000397 | Intergenic  |
| chr3  | 42683701  | 42686100  |           | Down | -1.38 | 1.24E-06 | 0.000447 | Intergenic  |
| chr17 | 49313801  | 49318200  |           | Down | -1.38 | 2.60E-06 | 0.00072  | Intergenic  |
| chrX  | 129558401 | 129559400 |           | Down | -1.38 | 2.85E-06 | 0.000772 | Intergenic  |
| chr14 | 49820801  | 49821900  |           | Down | -1.38 | 3.28E-06 | 0.000855 | Intergenic  |
| chr6  | 140031701 | 140033300 |           | Down | -1.38 | 8.10E-06 | 0.001666 | Intergenic  |
| chr14 | 90423501  | 90424700  |           | Down | -1.38 | 9.09E-06 | 0.001825 | Intergenic  |
| chr4  | 99812101  | 99813100  |           | Down | -1.38 | 9.30E-06 | 0.001857 | Intergenic  |
| chr17 | 49585701  | 49592400  |           | Down | -1.38 | 1.36E-05 | 0.00243  | Intergenic  |
| chr20 | 2479701   | 2480700   |           | Down | -1.38 | 1.64E-05 | 0.00281  | Intergenic  |
| chr1  | 112641101 | 112642100 |           | Down | -1.38 | 2.22E-05 | 0.003514 | Intergenic  |
| chr4  | 173531301 | 173532300 |           | Down | -1.38 | 2.43E-05 | 0.003755 | Intergenic  |
| chr16 | 21288701  | 21290200  |           | Down | -1.38 | 3.35E-05 | 0.0047   | Intergenic  |
| chr6  | 140937701 | 140939100 |           | Down | -1.38 | 4.84E-05 | 0.006132 | Intergenic  |
| chr2  | 402601    | 404000    |           | Down | -1.38 | 5.36E-05 | 0.00657  | Intergenic  |
| chr1  | 173350501 | 173351500 |           | Down | -1.38 | 5.96E-05 | 0.007083 | Intergenic  |

|       |           |           |           |      |       |          |          |            |
|-------|-----------|-----------|-----------|------|-------|----------|----------|------------|
| chr16 | 27546701  | 27548400  |           | Down | -1.38 | 0.000267 | 0.025621 | Intergenic |
| chr1  | 244068701 | 244069700 | RGD15658  | Down | -1.39 | 1.03E-07 | 9.13E-05 | Genebody   |
| chr9  | 1147901   | 1149800   | Spetex-2H | Down | -1.39 | 2.20E-07 | 0.000164 | Genebody   |
| chr13 | 93078501  | 93079600  | Cyp2c7    | Down | -1.39 | 2.55E-07 | 0.000175 | Genebody   |
| chr16 | 27317301  | 27318900  |           | Down | -1.39 | 8.55E-08 | 7.78E-05 | Intergenic |
| chr14 | 49131201  | 49132700  |           | Down | -1.39 | 5.66E-07 | 0.000275 | Intergenic |
| chrX  | 129324101 | 129325900 |           | Down | -1.39 | 5.87E-07 | 0.00028  | Intergenic |
| chr1  | 50126001  | 50127000  |           | Down | -1.39 | 7.16E-07 | 0.000311 | Intergenic |
| chr6  | 139424101 | 139425400 |           | Down | -1.39 | 8.32E-07 | 0.000344 | Intergenic |
| chr6  | 138897401 | 138900100 |           | Down | -1.39 | 1.01E-06 | 0.000391 | Intergenic |
| chr6  | 139804301 | 139805300 |           | Down | -1.39 | 1.45E-06 | 0.00049  | Intergenic |
| chr8  | 39916501  | 39917700  |           | Down | -1.39 | 3.85E-06 | 0.000955 | Intergenic |
| chr17 | 49624901  | 49628300  |           | Down | -1.39 | 5.50E-06 | 0.001236 | Intergenic |
| chr1  | 111457201 | 111458200 |           | Down | -1.39 | 5.78E-06 | 0.001286 | Intergenic |
| chrX  | 130135401 | 130136500 |           | Down | -1.39 | 7.94E-06 | 0.001638 | Intergenic |
| chr2  | 154375401 | 154376900 |           | Down | -1.39 | 1.31E-05 | 0.002362 | Intergenic |
| chr6  | 5431801   | 5433000   |           | Down | -1.39 | 1.79E-05 | 0.002998 | Intergenic |
| chr16 | 22080001  | 22081100  |           | Down | -1.39 | 2.30E-05 | 0.003607 | Intergenic |
| chr16 | 31125201  | 31126300  |           | Down | -1.39 | 2.56E-05 | 0.003861 | Intergenic |
| chr1  | 519401    | 520600    |           | Down | -1.39 | 3.85E-05 | 0.005211 | Intergenic |
| chr16 | 27233701  | 27234900  |           | Down | -1.39 | 0.000119 | 0.011768 | Intergenic |
| chr15 | 53137901  | 53138900  | Cyp2c7    | Down | -1.4  | 3.62E-07 | 0.000215 | Genebody   |
| chr1  | 244162701 | 244163900 | Mtmr3     | Down | -1.4  | 3.74E-06 | 0.000938 | Genebody   |
| chr1  | 75005901  | 75007600  | Prkacb    | Down | -1.4  | 5.67E-05 | 0.006837 | Genebody   |
| chr10 | 21423401  | 21425300  | Akr1c12l1 | Down | -1.4  | 8.70E-05 | 0.009185 | Genebody   |
| chr18 | 76808401  | 76810400  |           | Down | -1.4  | 2.27E-07 | 0.000167 | Intergenic |
| chr9  | 717501    | 719400    |           | Down | -1.4  | 5.38E-07 | 0.000269 | Intergenic |
| chr6  | 139311301 | 139313600 |           | Down | -1.4  | 5.97E-07 | 0.000284 | Intergenic |
| chr1  | 112621001 | 112623200 |           | Down | -1.4  | 9.05E-07 | 0.000364 | Intergenic |
| chr8  | 42049901  | 42051300  |           | Down | -1.4  | 1.05E-06 | 0.000402 | Intergenic |
| chr14 | 48752401  | 48755500  |           | Down | -1.4  | 1.61E-06 | 0.000529 | Intergenic |
| chr9  | 5716101   | 5718500   |           | Down | -1.4  | 3.90E-06 | 0.000964 | Intergenic |
| chr6  | 91378501  | 91379700  |           | Down | -1.4  | 5.49E-06 | 0.001236 | Intergenic |
| chr1  | 112626501 | 112627600 |           | Down | -1.4  | 1.28E-05 | 0.002337 | Intergenic |
| chr1  | 52523501  | 52524500  |           | Down | -1.4  | 1.60E-05 | 0.002766 | Intergenic |
| chr8  | 39952701  | 39954200  |           | Down | -1.4  | 3.38E-05 | 0.004724 | Intergenic |
| chr20 | 2469601   | 2470600   |           | Down | -1.4  | 5.30E-05 | 0.006516 | Intergenic |
| chr13 | 70269201  | 70270700  | Fig4      | Down | -1.41 | 1.71E-05 | 0.002894 | Genebody   |
| chr2  | 256365101 | 256366100 | Cbfa2t2   | Down | -1.41 | 3.72E-05 | 0.005086 | Genebody   |
| chr16 | 27193201  | 27194500  |           | Down | -1.41 | 2.98E-07 | 0.000194 | Intergenic |
| chr16 | 39236601  | 39237900  |           | Down | -1.41 | 3.05E-07 | 0.000197 | Intergenic |
| chr1  | 75488401  | 75490000  |           | Down | -1.41 | 3.35E-07 | 0.000208 | Intergenic |
| chr8  | 40005601  | 40006600  |           | Down | -1.41 | 2.49E-06 | 0.000696 | Intergenic |
| chr2  | 221525301 | 221526300 |           | Down | -1.41 | 2.61E-06 | 0.000722 | Intergenic |
| chr13 | 15797201  | 15798200  |           | Down | -1.41 | 2.81E-06 | 0.000763 | Intergenic |
| chr20 | 36938301  | 36939300  |           | Down | -1.41 | 4.81E-06 | 0.001123 | Intergenic |
| chr8  | 93996101  | 93997100  |           | Down | -1.41 | 4.95E-06 | 0.001144 | Intergenic |
| chr5  | 93772201  | 93773300  |           | Down | -1.41 | 1.04E-05 | 0.002021 | Intergenic |

|       |           |           |         |      |       |          |          |            |
|-------|-----------|-----------|---------|------|-------|----------|----------|------------|
| chr14 | 21801     | 22800     |         | Down | -1.41 | 4.48E-05 | 0.005813 | Intergenic |
| chr6  | 139226001 | 139227400 |         | Down | -1.41 | 0.000312 | 0.029652 | Intergenic |
| chr7  | 19080801  | 19081900  | Sorcs1  | Down | -1.42 | 1.28E-05 | 0.002328 | Genebody   |
| chr6  | 140924301 | 140925800 |         | Down | -1.42 | 1.86E-07 | 0.000145 | Intergenic |
| chr9  | 5562601   | 5564400   |         | Down | -1.42 | 2.93E-07 | 0.000194 | Intergenic |
| chr2  | 1282701   | 1284300   |         | Down | -1.42 | 3.31E-07 | 0.000208 | Intergenic |
| chr4  | 99822601  | 99824400  |         | Down | -1.42 | 3.89E-07 | 0.000225 | Intergenic |
| chr1  | 75499501  | 75502000  |         | Down | -1.42 | 4.03E-07 | 0.000229 | Intergenic |
| chr14 | 21910001  | 21911400  |         | Down | -1.42 | 4.48E-07 | 0.000241 | Intergenic |
| chr14 | 49358001  | 49359200  |         | Down | -1.42 | 4.64E-07 | 0.000244 | Intergenic |
| chr4  | 161647901 | 161649800 |         | Down | -1.42 | 8.03E-07 | 0.000335 | Intergenic |
| chr7  | 18531601  | 18533800  |         | Down | -1.42 | 1.94E-06 | 0.000591 | Intergenic |
| chr9  | 5594201   | 5595300   |         | Down | -1.42 | 3.51E-06 | 0.0009   | Intergenic |
| chr17 | 49447701  | 49452300  |         | Down | -1.42 | 3.70E-06 | 0.000934 | Intergenic |
| chr9  | 809801    | 811800    |         | Down | -1.42 | 8.26E-06 | 0.00169  | Intergenic |
| chr9  | 5712301   | 5713300   |         | Down | -1.42 | 1.82E-05 | 0.003044 | Intergenic |
| chr12 | 17800201  | 17802100  |         | Down | -1.42 | 3.02E-05 | 0.004361 | Intergenic |
| chr14 | 49023801  | 49024800  |         | Down | -1.42 | 3.57E-05 | 0.004923 | Intergenic |
| chr4  | 17029701  | 17030700  |         | Down | -1.42 | 7.40E-05 | 0.008238 | Intergenic |
| chr7  | 19186601  | 19187600  | Stxbp6  | Down | -1.43 | 2.03E-07 | 0.000154 | Genebody   |
| chr1  | 75007701  | 75008700  | Gphn    | Down | -1.43 | 1.63E-05 | 0.002791 | Genebody   |
| chr7  | 19058501  | 19060100  | Sult2a2 | Down | -1.43 | 5.71E-05 | 0.00687  | Genebody   |
| chr8  | 39898001  | 39899700  |         | Down | -1.43 | 2.54E-07 | 0.000175 | Intergenic |
| chr11 | 66357801  | 66359300  |         | Down | -1.43 | 4.93E-07 | 0.000253 | Intergenic |
| chr2  | 1348001   | 1349200   |         | Down | -1.43 | 6.73E-07 | 0.000301 | Intergenic |
| chr8  | 40064901  | 40065900  |         | Down | -1.43 | 1.47E-06 | 0.000497 | Intergenic |
| chr8  | 26990501  | 26991500  |         | Down | -1.43 | 3.03E-06 | 0.000806 | Intergenic |
| chr14 | 48765701  | 48767700  |         | Down | -1.43 | 3.88E-06 | 0.000963 | Intergenic |
| chr1  | 77097701  | 77098700  |         | Down | -1.43 | 3.93E-06 | 0.000971 | Intergenic |
| chr4  | 57783901  | 57784900  |         | Down | -1.43 | 5.97E-06 | 0.001318 | Intergenic |
| chr1  | 229840001 | 229842400 |         | Down | -1.43 | 7.25E-06 | 0.001528 | Intergenic |
| chr11 | 67091901  | 67092900  |         | Down | -1.43 | 7.64E-06 | 0.001594 | Intergenic |
| chr14 | 49073501  | 49074500  |         | Down | -1.43 | 9.95E-06 | 0.001954 | Intergenic |
| chr16 | 21990301  | 21991500  |         | Down | -1.43 | 1.10E-05 | 0.002104 | Intergenic |
| chr1  | 86883001  | 86884000  |         | Down | -1.43 | 2.14E-05 | 0.003431 | Intergenic |
| chr14 | 49787201  | 49788200  |         | Down | -1.43 | 3.25E-05 | 0.004608 | Intergenic |
| chr6  | 139349101 | 139350100 |         | Down | -1.43 | 6.20E-05 | 0.00729  | Intergenic |
| chr16 | 20691101  | 20692100  |         | Down | -1.43 | 8.37E-05 | 0.008974 | Intergenic |
| chr17 | 72242201  | 72243500  |         | Down | -1.43 | 0.000285 | 0.027244 | Intergenic |
| chr10 | 86012601  | 86013700  | Prl3d2  | Down | -1.44 | 1.94E-07 | 0.000149 | 3k promote |
| chr14 | 43988601  | 43989600  | Camta1  | Down | -1.44 | 1.29E-07 | 0.00011  | Genebody   |
| chr1  | 243943601 | 243947200 | Zcchc7  | Down | -1.44 | 2.26E-05 | 0.003568 | Genebody   |
| chr2  | 1315401   | 1318300   |         | Down | -1.44 | 2.43E-07 | 0.000174 | Intergenic |
| chr6  | 68766901  | 68768500  |         | Down | -1.44 | 4.04E-07 | 0.000229 | Intergenic |
| chrX  | 129342401 | 129344100 |         | Down | -1.44 | 6.28E-07 | 0.00029  | Intergenic |
| chr2  | 154377601 | 154381100 |         | Down | -1.44 | 9.40E-07 | 0.000373 | Intergenic |
| chr6  | 139820301 | 139824900 |         | Down | -1.44 | 1.68E-06 | 0.000546 | Intergenic |
| chr3  | 108595701 | 108596900 |         | Down | -1.44 | 2.07E-06 | 0.000619 | Intergenic |



|       |           |           |         |       |          |          |            |            |
|-------|-----------|-----------|---------|-------|----------|----------|------------|------------|
| chr5  | 53485701  | 53486700  | Down    | -1.44 | 7.30E-06 | 0.001535 | Intergenic |            |
| chr1  | 84759901  | 84760900  | Down    | -1.44 | 1.76E-05 | 0.002956 | Intergenic |            |
| chr1  | 134301    | 135400    | Down    | -1.44 | 3.36E-05 | 0.004713 | Intergenic |            |
| chr20 | 38371401  | 38372400  | Down    | -1.44 | 5.24E-05 | 0.006469 | Intergenic |            |
| chr8  | 43390101  | 43391300  | Mpp5    | Down  | -1.45    | 8.75E-06 | 0.001767   | Genebody   |
| chr15 | 5948201   | 5949600   | Cyp2c7  | Down  | -1.45    | 8.76E-06 | 0.001767   | Genebody   |
| chr18 | 38829401  | 38831100  | Down    | -1.45 | 1.99E-07 | 0.000152 | Intergenic |            |
| chr1  | 111727501 | 111729300 | Down    | -1.45 | 2.49E-07 | 0.000175 | Intergenic |            |
| chr1  | 172648801 | 172650700 | Down    | -1.45 | 2.95E-07 | 0.000194 | Intergenic |            |
| chr1  | 112628101 | 112629800 | Down    | -1.45 | 6.62E-07 | 0.000299 | Intergenic |            |
| chr20 | 37884901  | 37886600  | Down    | -1.45 | 1.12E-06 | 0.000416 | Intergenic |            |
| chr3  | 537601    | 538800    | Down    | -1.45 | 1.67E-06 | 0.000545 | Intergenic |            |
| chr2  | 1274301   | 1275400   | Down    | -1.45 | 1.87E-05 | 0.003087 | Intergenic |            |
| chr7  | 915101    | 916100    | Down    | -1.45 | 3.77E-05 | 0.005125 | Intergenic |            |
| chr9  | 4385101   | 4386600   | Nrap    | Down  | -1.46    | 1.63E-07 | 0.000132   | Genebody   |
| chr1  | 74583101  | 74584500  | Vom2r64 | Down  | -1.46    | 3.91E-07 | 0.000226   | Genebody   |
| chr1  | 243603001 | 243604600 | Down    | -1.46 | 1.46E-07 | 0.000121 | Intergenic |            |
| chr1  | 47751701  | 47752900  | Down    | -1.46 | 4.08E-07 | 0.000231 | Intergenic |            |
| chr2  | 563201    | 564200    | Down    | -1.46 | 4.15E-07 | 0.000232 | Intergenic |            |
| chr17 | 49709801  | 49712100  | Down    | -1.46 | 4.41E-07 | 0.000239 | Intergenic |            |
| chr16 | 27596701  | 27599700  | Down    | -1.46 | 1.88E-06 | 0.000579 | Intergenic |            |
| chr20 | 36886201  | 36887300  | Down    | -1.46 | 2.01E-06 | 0.000607 | Intergenic |            |
| chr8  | 25085701  | 25086700  | Down    | -1.46 | 2.99E-06 | 0.000796 | Intergenic |            |
| chr14 | 48777201  | 48782700  | Down    | -1.46 | 7.66E-06 | 0.001595 | Intergenic |            |
| chr17 | 49277101  | 49279100  | Down    | -1.46 | 9.98E-06 | 0.001958 | Intergenic |            |
| chr6  | 139784501 | 139785500 | Down    | -1.46 | 1.09E-05 | 0.002084 | Intergenic |            |
| chr2  | 39471301  | 39472300  | Down    | -1.46 | 2.82E-05 | 0.004161 | Intergenic |            |
| chr9  | 797601    | 798600    | Down    | -1.46 | 4.23E-05 | 0.005583 | Intergenic |            |
| chr14 | 49699501  | 49701000  | Down    | -1.47 | 3.38E-07 | 0.000209 | Intergenic |            |
| chr1  | 246450601 | 246451700 | Down    | -1.47 | 8.02E-07 | 0.000335 | Intergenic |            |
| chr9  | 802601    | 803600    | Down    | -1.47 | 2.66E-06 | 0.000731 | Intergenic |            |
| chr2  | 188557601 | 188558600 | Down    | -1.47 | 1.29E-05 | 0.002342 | Intergenic |            |
| chr17 | 49657001  | 49658100  | Down    | -1.47 | 3.29E-05 | 0.004639 | Intergenic |            |
| chr1  | 112612901 | 112613900 | Down    | -1.47 | 6.05E-05 | 0.007148 | Intergenic |            |
| chr10 | 55886801  | 55887900  | Fam83h  | Down  | -1.48    | 1.12E-06 | 0.000415   | 3k promote |
| chr1  | 171192101 | 171193100 | Cyp2c7  | Down  | -1.48    | 1.74E-07 | 0.000138   | Genebody   |
| chr15 | 5428101   | 5429900   | Fndc3a  | Down  | -1.48    | 6.77E-06 | 0.001453   | Genebody   |
| chr1  | 112598101 | 112599500 | Down    | -1.48 | 5.85E-08 | 5.55E-05 | Intergenic |            |
| chr2  | 1683001   | 1684900   | Down    | -1.48 | 3.44E-07 | 0.00021  | Intergenic |            |
| chr3  | 138133601 | 138134900 | Down    | -1.48 | 4.15E-07 | 0.000232 | Intergenic |            |
| chr1  | 112591901 | 112594100 | Down    | -1.48 | 4.81E-07 | 0.000251 | Intergenic |            |
| chr2  | 1356401   | 1359000   | Down    | -1.48 | 5.13E-07 | 0.00026  | Intergenic |            |
| chr14 | 49630101  | 49632700  | Down    | -1.48 | 5.87E-07 | 0.00028  | Intergenic |            |
| chr4  | 57710501  | 57711600  | Down    | -1.48 | 2.21E-06 | 0.000645 | Intergenic |            |
| chr5  | 81612201  | 81614600  | Down    | -1.48 | 2.74E-06 | 0.000747 | Intergenic |            |
| chr6  | 139770801 | 139771900 | Down    | -1.48 | 2.82E-06 | 0.000763 | Intergenic |            |
| chr14 | 90877001  | 90879900  | Down    | -1.48 | 5.16E-06 | 0.001182 | Intergenic |            |
| chr1  | 38254601  | 38255600  | Down    | -1.48 | 7.08E-06 | 0.001506 | Intergenic |            |

|       |           |           |           |      |       |          |          |            |
|-------|-----------|-----------|-----------|------|-------|----------|----------|------------|
| chr15 | 18172501  | 18173500  |           | Down | -1.48 | 8.75E-06 | 0.001767 | Intergenic |
| chr18 | 43043001  | 43044200  |           | Down | -1.48 | 5.13E-05 | 0.006373 | Intergenic |
| chr15 | 5089701   | 5091900   | Amph      | Down | -1.49 | 6.81E-07 | 0.000303 | Genebody   |
| chr2  | 20055301  | 20056500  | Tbc1d5    | Down | -1.49 | 3.64E-06 | 0.000923 | Genebody   |
| chr6  | 138842101 | 138844200 |           | Down | -1.49 | 4.25E-07 | 0.000235 | Intergenic |
| chr17 | 49598801  | 49602300  |           | Down | -1.49 | 1.03E-06 | 0.000395 | Intergenic |
| chr6  | 139527801 | 139529400 |           | Down | -1.49 | 1.29E-06 | 0.000456 | Intergenic |
| chr9  | 764001    | 765100    |           | Down | -1.49 | 1.29E-06 | 0.000456 | Intergenic |
| chrX  | 95070701  | 95072800  |           | Down | -1.49 | 1.71E-06 | 0.000553 | Intergenic |
| chr1  | 111677801 | 111679300 |           | Down | -1.49 | 4.61E-06 | 0.001094 | Intergenic |
| chr15 | 12305201  | 12306200  |           | Down | -1.49 | 2.48E-05 | 0.003795 | Intergenic |
| chr16 | 27405601  | 27406900  |           | Down | -1.49 | 2.50E-05 | 0.003817 | Intergenic |
| chr6  | 138663401 | 138665400 |           | Down | -1.49 | 2.68E-05 | 0.004002 | Intergenic |
| chr3  | 118933901 | 118934900 |           | Down | -1.49 | 2.96E-05 | 0.004308 | Intergenic |
| chr16 | 30973101  | 30974900  |           | Down | -1.5  | 1.23E-07 | 0.000106 | Intergenic |
| chr7  | 3345901   | 3348300   |           | Down | -1.5  | 4.39E-07 | 0.000239 | Intergenic |
| chr5  | 42110701  | 42112000  |           | Down | -1.5  | 5.76E-07 | 0.000277 | Intergenic |
| chr1  | 112582601 | 112584500 |           | Down | -1.5  | 7.05E-07 | 0.000309 | Intergenic |
| chr6  | 139935901 | 139937000 |           | Down | -1.5  | 1.37E-06 | 0.000472 | Intergenic |
| chr1  | 47924601  | 47925700  |           | Down | -1.5  | 2.93E-06 | 0.000784 | Intergenic |
| chr3  | 138267201 | 138268300 |           | Down | -1.5  | 3.04E-06 | 0.000807 | Intergenic |
| chr20 | 48988901  | 48990100  |           | Down | -1.5  | 6.17E-06 | 0.001349 | Intergenic |
| chr1  | 15269101  | 15270100  |           | Down | -1.5  | 1.89E-05 | 0.003109 | Intergenic |
| chr3  | 166999801 | 167001000 |           | Down | -1.5  | 2.18E-05 | 0.003466 | Intergenic |
| chr14 | 21904801  | 21906100  |           | Down | -1.5  | 0.000108 | 0.010808 | Intergenic |
| chr6  | 22162101  | 22164800  | Tpgs1     | Down | -1.51 | 1.58E-07 | 0.000129 | Genebody   |
| chr17 | 53559701  | 53560800  | Xrcc4     | Down | -1.51 | 2.25E-07 | 0.000166 | Genebody   |
| chr1  | 74949101  | 74950100  | Gramd1b   | Down | -1.51 | 1.90E-06 | 0.000582 | Genebody   |
| chr1  | 112587401 | 112589900 |           | Down | -1.51 | 2.98E-07 | 0.000194 | Intergenic |
| chr9  | 5865901   | 5867400   |           | Down | -1.51 | 3.49E-07 | 0.000212 | Intergenic |
| chr2  | 154381701 | 154383800 |           | Down | -1.51 | 4.64E-07 | 0.000244 | Intergenic |
| chr1  | 75736001  | 75737200  |           | Down | -1.51 | 7.12E-07 | 0.000311 | Intergenic |
| chr17 | 49714701  | 49718000  |           | Down | -1.51 | 7.60E-07 | 0.000324 | Intergenic |
| chr3  | 138149601 | 138151100 |           | Down | -1.51 | 1.45E-05 | 0.002558 | Intergenic |
| chr6  | 139015401 | 139016500 |           | Down | -1.51 | 1.85E-05 | 0.003073 | Intergenic |
| chr2  | 939701    | 942400    |           | Down | -1.51 | 1.95E-05 | 0.003184 | Intergenic |
| chr16 | 21168301  | 21169300  |           | Down | -1.51 | 4.08E-05 | 0.005428 | Intergenic |
| chr1  | 243610501 | 243611600 |           | Down | -1.51 | 6.60E-05 | 0.007627 | Intergenic |
| chr1  | 244098401 | 244099400 | Sult2a2   | Down | -1.52 | 5.98E-08 | 5.65E-05 | Genebody   |
| chr1  | 75108401  | 75109500  | Phlpp1    | Down | -1.52 | 2.03E-07 | 0.000154 | Genebody   |
| chr6  | 64484201  | 64485600  | Sult1c2a  | Down | -1.52 | 2.52E-07 | 0.000175 | Genebody   |
| chr9  | 1070301   | 1071600   | Lrrc7     | Down | -1.52 | 2.72E-06 | 0.000743 | Genebody   |
| chr1  | 75651601  | 75652600  | LOC300308 | Down | -1.52 | 1.76E-05 | 0.002961 | Genebody   |
| chr5  | 168539401 | 168541600 | Sult2a2   | Down | -1.52 | 3.91E-05 | 0.005268 | Genebody   |
| chr3  | 138156601 | 138158100 |           | Down | -1.52 | 1.92E-07 | 0.000148 | Intergenic |
| chr2  | 154415301 | 154417300 |           | Down | -1.52 | 2.28E-07 | 0.000167 | Intergenic |
| chr1  | 112468701 | 112470100 |           | Down | -1.52 | 3.38E-07 | 0.000209 | Intergenic |
| chr17 | 49633901  | 49636300  |           | Down | -1.52 | 4.38E-07 | 0.000239 | Intergenic |

|       |           |           |         |      |       |          |          |             |
|-------|-----------|-----------|---------|------|-------|----------|----------|-------------|
| chr17 | 94183401  | 94184500  |         | Down | -1.52 | 7.18E-07 | 0.000311 | Intergenic  |
| chr3  | 19046801  | 19048700  |         | Down | -1.52 | 7.30E-07 | 0.000314 | Intergenic  |
| chr2  | 187215601 | 187216700 |         | Down | -1.52 | 1.82E-06 | 0.000571 | Intergenic  |
| chr17 | 72292101  | 72293800  |         | Down | -1.52 | 4.08E-06 | 0.001    | Intergenic  |
| chr3  | 2019901   | 2020900   |         | Down | -1.52 | 7.12E-06 | 0.001512 | Intergenic  |
| chr4  | 23308601  | 23311300  |         | Down | -1.52 | 9.40E-06 | 0.001874 | Intergenic  |
| chr17 | 49440901  | 49442400  |         | Down | -1.52 | 1.70E-05 | 0.002892 | Intergenic  |
| chr2  | 154384801 | 154386000 |         | Down | -1.52 | 4.72E-05 | 0.006021 | Intergenic  |
| chr1  | 147317801 | 147318800 |         | Down | -1.52 | 8.53E-05 | 0.009091 | Intergenic  |
| chr1  | 112357601 | 112358600 |         | Down | -1.53 | 1.13E-07 | 9.88E-05 | Intergenic  |
| chr2  | 1220501   | 1222200   |         | Down | -1.53 | 2.47E-07 | 0.000175 | Intergenic  |
| chr16 | 27593001  | 27594800  |         | Down | -1.53 | 1.19E-06 | 0.000437 | Intergenic  |
| chr1  | 51427001  | 51428500  |         | Down | -1.53 | 1.40E-06 | 0.000481 | Intergenic  |
| chr1  | 4775001   | 4776400   |         | Down | -1.53 | 3.49E-06 | 0.000897 | Intergenic  |
| chr14 | 49120301  | 49122000  |         | Down | -1.53 | 2.09E-05 | 0.003359 | Intergenic  |
| chr1  | 243749301 | 243751300 | Limch1  | Down | -1.54 | 7.39E-08 | 6.81E-05 | Genebody    |
| chr12 | 27809101  | 27810100  | Slc16a6 | Down | -1.54 | 7.60E-05 | 0.008368 | Genebody    |
| chr2  | 154435801 | 154437700 |         | Down | -1.54 | 1.91E-07 | 0.000147 | Intergenic  |
| chr14 | 49547601  | 49548900  |         | Down | -1.54 | 3.18E-07 | 0.000202 | Intergenic  |
| chr2  | 564301    | 566700    |         | Down | -1.54 | 5.64E-07 | 0.000275 | Intergenic  |
| chr17 | 49435401  | 49439300  |         | Down | -1.54 | 5.83E-07 | 0.00028  | Intergenic  |
| chr7  | 5952401   | 5954400   |         | Down | -1.54 | 6.09E-07 | 0.000285 | Intergenic  |
| chr6  | 140038901 | 140039900 |         | Down | -1.54 | 6.22E-07 | 0.000288 | Intergenic  |
| chr18 | 38813001  | 38816300  |         | Down | -1.54 | 6.54E-07 | 0.000297 | Intergenic  |
| chr1  | 62015001  | 62016000  |         | Down | -1.54 | 1.11E-05 | 0.002112 | Intergenic  |
| chr3  | 138198901 | 138200100 |         | Down | -1.54 | 4.98E-05 | 0.006237 | Intergenic  |
| chr6  | 139975001 | 139976100 |         | Down | -1.54 | 5.36E-05 | 0.00657  | Intergenic  |
| chr12 | 17825001  | 17826100  |         | Down | -1.54 | 0.000106 | 0.010659 | Intergenic  |
| chr12 | 18780501  | 18782300  |         | Down | -1.55 | 3.49E-08 | 3.38E-05 | Intergenic  |
| chr6  | 139382301 | 139384000 |         | Down | -1.55 | 1.18E-07 | 0.000103 | Intergenic  |
| chr1  | 243587801 | 243588800 |         | Down | -1.55 | 5.07E-07 | 0.000258 | Intergenic  |
| chr3  | 9276501   | 9277700   |         | Down | -1.55 | 1.24E-06 | 0.000447 | Intergenic  |
| chr4  | 120724901 | 120725900 |         | Down | -1.55 | 4.55E-06 | 0.001082 | Intergenic  |
| chr8  | 40224601  | 40225600  |         | Down | -1.55 | 6.82E-06 | 0.00146  | Intergenic  |
| chr3  | 140105601 | 140107400 |         | Down | -1.55 | 1.62E-05 | 0.002783 | Intergenic  |
| chr4  | 167384401 | 167385400 |         | Down | -1.55 | 7.32E-05 | 0.0082   | Intergenic  |
| chr3  | 138091401 | 138092400 | Andpro  | Down | -1.55 | 4.86E-05 | 0.006146 | proximal pr |
| chr1  | 75060401  | 75062600  | Xrcc4   | Down | -1.56 | 1.46E-07 | 0.000121 | Genebody    |
| chr14 | 84446901  | 84448300  | Amph    | Down | -1.56 | 2.12E-06 | 0.000626 | Genebody    |
| chr6  | 100903401 | 100904600 | Btbd10  | Down | -1.56 | 1.17E-05 | 0.002189 | Genebody    |
| chr6  | 139045001 | 139047200 |         | Down | -1.56 | 9.85E-08 | 8.80E-05 | Intergenic  |
| chr16 | 27549301  | 27551600  |         | Down | -1.56 | 4.48E-07 | 0.000241 | Intergenic  |
| chr6  | 42637401  | 42638900  |         | Down | -1.56 | 4.69E-07 | 0.000245 | Intergenic  |
| chr6  | 140940401 | 140941500 |         | Down | -1.56 | 5.41E-07 | 0.00027  | Intergenic  |
| chr7  | 14345301  | 14346300  |         | Down | -1.56 | 5.52E-07 | 0.000272 | Intergenic  |
| chr16 | 27683801  | 27684800  |         | Down | -1.56 | 1.40E-06 | 0.000481 | Intergenic  |
| chr12 | 18178301  | 18179600  |         | Down | -1.56 | 1.89E-06 | 0.000581 | Intergenic  |
| chr2  | 1440301   | 1443300   |         | Down | -1.56 | 2.42E-06 | 0.000685 | Intergenic  |

|       |           |           |           |      |       |          |          |            |
|-------|-----------|-----------|-----------|------|-------|----------|----------|------------|
| chr14 | 21906401  | 21908100  |           | Down | -1.56 | 5.83E-05 | 0.006971 | Intergenic |
| chr14 | 21550801  | 21553100  |           | Down | -1.56 | 7.80E-05 | 0.008526 | Intergenic |
| chr10 | 98858501  | 98859600  | Sult2a2   | Down | -1.57 | 6.93E-07 | 0.000305 | Genebody   |
| chr1  | 171992701 | 171994600 | Sult2a2   | Down | -1.57 | 1.61E-05 | 0.002777 | Genebody   |
| chr16 | 61008901  | 61010500  | Cyp2c7    | Down | -1.57 | 5.82E-05 | 0.006967 | Genebody   |
| chr3  | 844801    | 846800    |           | Down | -1.57 | 8.87E-08 | 8.01E-05 | Intergenic |
| chr16 | 31122501  | 31123700  |           | Down | -1.57 | 2.50E-07 | 0.000175 | Intergenic |
| chr1  | 75517901  | 75519800  |           | Down | -1.57 | 3.33E-07 | 0.000208 | Intergenic |
| chr14 | 38001     | 39100     |           | Down | -1.57 | 1.83E-06 | 0.000571 | Intergenic |
| chr11 | 86925401  | 86926600  |           | Down | -1.57 | 7.75E-05 | 0.008485 | Intergenic |
| chr1  | 74701001  | 74702000  | Spon1     | Down | -1.58 | 9.85E-06 | 0.001939 | Genebody   |
| chrX  | 130090101 | 130091300 |           | Down | -1.58 | 1.00E-06 | 0.000389 | Intergenic |
| chr3  | 167190001 | 167191100 |           | Down | -1.58 | 3.31E-06 | 0.000861 | Intergenic |
| chr8  | 39765301  | 39766400  |           | Down | -1.58 | 8.02E-06 | 0.001652 | Intergenic |
| chr12 | 19383301  | 19384800  |           | Down | -1.58 | 0.000109 | 0.010857 | Intergenic |
| chr1  | 74706301  | 74707300  | Sult2a1   | Down | -1.59 | 4.85E-06 | 0.001128 | Genebody   |
| chr1  | 243947801 | 243949900 | Sult2a1   | Down | -1.59 | 2.91E-05 | 0.00425  | Genebody   |
| chr5  | 92842301  | 92844200  |           | Down | -1.59 | 7.02E-09 | 6.92E-06 | Intergenic |
| chr1  | 75965001  | 75966500  |           | Down | -1.59 | 1.60E-07 | 0.00013  | Intergenic |
| chr1  | 111706601 | 111707900 |           | Down | -1.59 | 2.78E-07 | 0.000187 | Intergenic |
| chr11 | 21094201  | 21095300  |           | Down | -1.59 | 4.54E-07 | 0.000242 | Intergenic |
| chr2  | 154310501 | 154313400 |           | Down | -1.59 | 5.64E-07 | 0.000275 | Intergenic |
| chr3  | 138192901 | 138193900 |           | Down | -1.59 | 6.04E-07 | 0.000285 | Intergenic |
| chr2  | 136317501 | 136318600 |           | Down | -1.59 | 1.17E-06 | 0.00043  | Intergenic |
| chr3  | 138050201 | 138052600 |           | Down | -1.6  | 4.28E-07 | 0.000236 | Intergenic |
| chr1  | 75750801  | 75751900  |           | Down | -1.6  | 4.91E-07 | 0.000253 | Intergenic |
| chr4  | 57791101  | 57792900  |           | Down | -1.6  | 6.04E-07 | 0.000285 | Intergenic |
| chr16 | 20693501  | 20694900  |           | Down | -1.6  | 1.99E-06 | 0.000603 | Intergenic |
| chr17 | 49533801  | 49535500  |           | Down | -1.6  | 2.33E-06 | 0.000669 | Intergenic |
| chr2  | 136020901 | 136022800 |           | Down | -1.6  | 3.81E-06 | 0.000949 | Intergenic |
| chr15 | 5591801   | 5593100   | Cyp2c7    | Down | -1.61 | 2.34E-07 | 0.00017  | Genebody   |
| chr1  | 75024201  | 75026100  | Sult2a2   | Down | -1.61 | 5.74E-06 | 0.001282 | Genebody   |
| chr1  | 243624601 | 243625600 |           | Down | -1.61 | 3.11E-07 | 0.000199 | Intergenic |
| chr5  | 53534401  | 53535500  |           | Down | -1.61 | 7.25E-07 | 0.000313 | Intergenic |
| chr6  | 138832901 | 138834600 |           | Down | -1.61 | 4.26E-06 | 0.001029 | Intergenic |
| chr6  | 139934201 | 139935600 |           | Down | -1.61 | 1.08E-05 | 0.002069 | Intergenic |
| chr3  | 165674401 | 165676000 |           | Down | -1.61 | 2.77E-05 | 0.004092 | Intergenic |
| chr1  | 51356301  | 51357300  |           | Down | -1.61 | 7.81E-05 | 0.008528 | Intergenic |
| chr15 | 6021201   | 6022700   | Brca1     | Down | -1.62 | 4.94E-06 | 0.001144 | Genebody   |
| chr17 | 53570801  | 53572000  | Spetex-2D | Down | -1.62 | 2.93E-05 | 0.004269 | Genebody   |
| chr2  | 1218201   | 1219400   |           | Down | -1.62 | 2.99E-07 | 0.000194 | Intergenic |
| chr6  | 138831001 | 138832500 |           | Down | -1.62 | 5.18E-07 | 0.000262 | Intergenic |
| chr14 | 48965701  | 48967700  |           | Down | -1.62 | 5.99E-07 | 0.000284 | Intergenic |
| chr4  | 167404901 | 167406300 |           | Down | -1.62 | 6.77E-07 | 0.000302 | Intergenic |
| chr3  | 138187401 | 138188400 |           | Down | -1.62 | 1.39E-06 | 0.000479 | Intergenic |
| chr8  | 39947401  | 39948500  |           | Down | -1.62 | 1.16E-05 | 0.002176 | Intergenic |
| chrX  | 49029301  | 49030600  | Sult2a2   | Down | -1.63 | 2.13E-06 | 0.000627 | Genebody   |
| chr14 | 50601     | 51900     | Vkorc1l1  | Down | -1.63 | 4.50E-05 | 0.005831 | Genebody   |

|       |           |           |         |      |       |          |          |             |
|-------|-----------|-----------|---------|------|-------|----------|----------|-------------|
| chr1  | 1066401   | 1067600   |         | Down | -1.63 | 3.30E-07 | 0.000208 | Intergenic  |
| chr17 | 49647801  | 49650600  |         | Down | -1.63 | 3.36E-07 | 0.000208 | Intergenic  |
| chr4  | 99818601  | 99819900  |         | Down | -1.63 | 9.37E-07 | 0.000373 | Intergenic  |
| chr8  | 40057701  | 40058700  |         | Down | -1.63 | 2.11E-06 | 0.000624 | Intergenic  |
| chr4  | 57744001  | 57745000  |         | Down | -1.63 | 5.14E-05 | 0.006375 | Intergenic  |
| chrX  | 128862701 | 128863700 |         | Down | -1.64 | 8.75E-07 | 0.000355 | Intergenic  |
| chr17 | 44563701  | 44565500  | Vom1r56 | Down | -1.65 | 4.04E-06 | 0.000992 | 3k promote  |
| chr14 | 49572701  | 49573800  |         | Down | -1.65 | 4.83E-07 | 0.000251 | Intergenic  |
| chr2  | 154401601 | 154402600 |         | Down | -1.65 | 1.60E-06 | 0.000527 | Intergenic  |
| chr5  | 126114001 | 126115000 |         | Down | -1.65 | 3.09E-06 | 0.000815 | Intergenic  |
| chr1  | 75742901  | 75743900  |         | Down | -1.65 | 5.63E-05 | 0.006808 | Intergenic  |
| chr13 | 17933001  | 17934600  |         | Down | -1.65 | 8.16E-05 | 0.008815 | Intergenic  |
| chr4  | 57734501  | 57736100  |         | Down | -1.66 | 1.92E-07 | 0.000148 | Intergenic  |
| chr3  | 530301    | 531300    |         | Down | -1.66 | 1.56E-06 | 0.000519 | Intergenic  |
| chr14 | 21912501  | 21913600  |         | Down | -1.66 | 0.000177 | 0.017242 | Intergenic  |
| chr7  | 114042701 | 114043700 | Andpro  | Down | -1.67 | 2.59E-07 | 0.000176 | 3k promote  |
| chr1  | 74974601  | 74975700  | Vom2r22 | Down | -1.67 | 2.45E-07 | 0.000175 | Genebody    |
| chr1  | 61970301  | 61971400  | Cyp2c7  | Down | -1.67 | 2.29E-05 | 0.003601 | Genebody    |
| chr14 | 42488001  | 42489500  |         | Down | -1.67 | 1.85E-07 | 0.000144 | Intergenic  |
| chr2  | 41368801  | 41369800  |         | Down | -1.67 | 1.78E-06 | 0.000565 | Intergenic  |
| chr12 | 17810501  | 17811700  |         | Down | -1.68 | 1.65E-07 | 0.000132 | Intergenic  |
| chr7  | 8408401   | 8411000   |         | Down | -1.68 | 6.57E-07 | 0.000297 | Intergenic  |
| chr20 | 36883801  | 36885600  |         | Down | -1.68 | 7.71E-06 | 0.001602 | Intergenic  |
| chr17 | 72355901  | 72356900  |         | Down | -1.68 | 2.47E-05 | 0.003794 | Intergenic  |
| chr14 | 21924701  | 21926000  |         | Down | -1.68 | 5.30E-05 | 0.006514 | Intergenic  |
| chr10 | 90561401  | 90562500  | Sult2a2 | Down | -1.69 | 1.46E-05 | 0.002565 | Genebody    |
| chr1  | 244197601 | 244198600 | Vom2r65 | Down | -1.69 | 7.21E-05 | 0.00811  | Genebody    |
| chr13 | 12365701  | 12367000  | Sult2a2 | Down | -1.69 | 7.47E-05 | 0.008264 | Genebody    |
| chr1  | 224470301 | 224472600 |         | Down | -1.69 | 1.40E-07 | 0.000117 | Intergenic  |
| chr8  | 11522801  | 11523800  |         | Down | -1.69 | 9.68E-07 | 0.000382 | Intergenic  |
| chr3  | 138090301 | 138091300 | Exoc2   | Down | -1.7  | 2.72E-05 | 0.004042 | 3k promote  |
| chr12 | 18721601  | 18723100  | Prep    | Down | -1.7  | 6.03E-07 | 0.000285 | Genebody    |
| chr3  | 167159201 | 167160300 |         | Down | -1.7  | 2.03E-07 | 0.000154 | Intergenic  |
| chr1  | 111719401 | 111721400 |         | Down | -1.7  | 3.96E-07 | 0.000227 | Intergenic  |
| chr2  | 96256201  | 96257200  |         | Down | -1.7  | 1.83E-06 | 0.000571 | Intergenic  |
| chr9  | 592801    | 593800    |         | Down | -1.7  | 4.69E-06 | 0.001107 | Intergenic  |
| chr16 | 89938401  | 89940300  | Slc10a2 | Down | -1.7  | 2.76E-07 | 0.000186 | proximal pr |
| chr1  | 104881701 | 104882700 |         | Down | -1.71 | 5.67E-07 | 0.000275 | Intergenic  |
| chr1  | 63192801  | 63193900  |         | Down | -1.71 | 3.82E-06 | 0.000951 | Intergenic  |
| chr6  | 138647601 | 138648700 |         | Down | -1.71 | 5.75E-06 | 0.001283 | Intergenic  |
| chr11 | 2740501   | 2741500   |         | Down | -1.71 | 4.58E-05 | 0.005886 | Intergenic  |
| chr17 | 39952501  | 39953500  | Sult2a2 | Down | -1.72 | 6.91E-08 | 6.45E-05 | 3k promote  |
| chr6  | 140923101 | 140924100 |         | Down | -1.73 | 1.65E-07 | 0.000132 | Intergenic  |
| chr2  | 154292201 | 154295100 |         | Down | -1.73 | 7.45E-07 | 0.000319 | Intergenic  |
| chr17 | 49651401  | 49653100  |         | Down | -1.73 | 0.000354 | 0.033581 | Intergenic  |
| chr2  | 20056901  | 20057900  | Vom2r64 | Down | -1.74 | 6.31E-05 | 0.007373 | Genebody    |
| chr12 | 18233901  | 18235100  | Sult2a2 | Down | -1.74 | 8.83E-05 | 0.009285 | Genebody    |
| chr11 | 80956501  | 80957700  |         | Down | -1.74 | 1.77E-07 | 0.000139 | Intergenic  |

|       |           |           |         |      |       |          |          |            |
|-------|-----------|-----------|---------|------|-------|----------|----------|------------|
| chr9  | 5543001   | 5544000   |         | Down | -1.74 | 2.31E-07 | 0.000168 | Intergenic |
| chr20 | 36915401  | 36917600  |         | Down | -1.74 | 2.38E-07 | 0.000171 | Intergenic |
| chr8  | 40055201  | 40056400  |         | Down | -1.74 | 2.76E-07 | 0.000186 | Intergenic |
| chr17 | 49630801  | 49631900  |         | Down | -1.74 | 2.91E-06 | 0.000781 | Intergenic |
| chr20 | 36887701  | 36888900  |         | Down | -1.74 | 3.09E-06 | 0.000815 | Intergenic |
| chr1  | 111682901 | 111684000 |         | Down | -1.74 | 5.56E-06 | 0.00125  | Intergenic |
| chr1  | 75502301  | 75503500  |         | Down | -1.74 | 8.83E-06 | 0.00178  | Intergenic |
| chr15 | 9631101   | 9632100   |         | Down | -1.75 | 3.74E-07 | 0.000219 | Intergenic |
| chr6  | 139864201 | 139865300 |         | Down | -1.75 | 2.44E-05 | 0.003768 | Intergenic |
| chr4  | 99810501  | 99811500  |         | Down | -1.75 | 3.88E-05 | 0.005236 | Intergenic |
| chr6  | 139289301 | 139290300 |         | Down | -1.75 | 5.65E-05 | 0.006825 | Intergenic |
| chr17 | 50030501  | 50031700  |         | Down | -1.75 | 0.000199 | 0.019253 | Intergenic |
| chr4  | 57780901  | 57782100  |         | Down | -1.76 | 1.03E-07 | 9.13E-05 | Intergenic |
| chr14 | 21936601  | 21939200  |         | Down | -1.76 | 2.99E-07 | 0.000194 | Intergenic |
| chr1  | 514901    | 516000    |         | Down | -1.76 | 3.25E-07 | 0.000206 | Intergenic |
| chr1  | 244159601 | 244160700 | Cyp2c7  | Down | -1.77 | 9.40E-05 | 0.009667 | Genebody   |
| chr1  | 112671401 | 112672900 |         | Down | -1.77 | 2.46E-07 | 0.000175 | Intergenic |
| chr6  | 139938301 | 139939300 |         | Down | -1.77 | 4.56E-05 | 0.005875 | Intergenic |
| chr1  | 204401    | 205400    |         | Down | -1.77 | 5.08E-05 | 0.006323 | Intergenic |
| chr6  | 139287901 | 139289000 |         | Down | -1.78 | 1.76E-07 | 0.000139 | Intergenic |
| chr7  | 11547701  | 11549200  | Cyp2c7  | Down | -1.79 | 1.41E-07 | 0.000118 | Genebody   |
| chr4  | 97847101  | 97848800  |         | Down | -1.79 | 3.78E-08 | 3.65E-05 | Intergenic |
| chr1  | 112631301 | 112632500 |         | Down | -1.79 | 1.37E-07 | 0.000116 | Intergenic |
| chr7  | 8412101   | 8414000   |         | Down | -1.79 | 9.42E-07 | 0.000373 | Intergenic |
| chr15 | 60114301  | 60115300  |         | Down | -1.79 | 2.11E-05 | 0.003384 | Intergenic |
| chr1  | 554301    | 555300    |         | Down | -1.8  | 4.78E-06 | 0.001123 | Intergenic |
| chr1  | 243709801 | 243711100 | Htr7    | Down | -1.81 | 1.60E-07 | 0.00013  | Genebody   |
| chr1  | 262645101 | 262646900 | Xrcc4   | Down | -1.81 | 1.55E-05 | 0.002702 | Genebody   |
| chr20 | 38234901  | 38235900  |         | Down | -1.81 | 2.56E-07 | 0.000175 | Intergenic |
| chr3  | 138136201 | 138137200 |         | Down | -1.81 | 4.80E-06 | 0.001123 | Intergenic |
| chr16 | 31072701  | 31073700  |         | Down | -1.81 | 5.31E-06 | 0.001207 | Intergenic |
| chr1  | 10512101  | 10513100  |         | Down | -1.83 | 3.71E-07 | 0.000218 | Intergenic |
| chr4  | 167727301 | 167728400 |         | Down | -1.83 | 4.80E-06 | 0.001123 | Intergenic |
| chr2  | 135519901 | 135520900 |         | Down | -1.84 | 8.77E-08 | 7.95E-05 | Intergenic |
| chr13 | 38895901  | 38897400  |         | Down | -1.84 | 8.55E-06 | 0.001739 | Intergenic |
| chr9  | 926501    | 927500    |         | Down | -1.85 | 1.21E-07 | 0.000104 | Intergenic |
| chr18 | 80875501  | 80876600  |         | Down | -1.85 | 2.24E-07 | 0.000166 | Intergenic |
| chr13 | 17944901  | 17947800  |         | Down | -1.85 | 3.53E-06 | 0.000903 | Intergenic |
| chr4  | 99951101  | 99952100  |         | Down | -1.85 | 3.07E-05 | 0.004416 | Intergenic |
| chr12 | 4531601   | 4532600   |         | Down | -1.86 | 3.00E-07 | 0.000194 | Intergenic |
| chr1  | 111696101 | 111697300 |         | Down | -1.87 | 3.18E-06 | 0.000836 | Intergenic |
| chr4  | 103037401 | 103038400 |         | Down | -1.87 | 3.29E-05 | 0.004639 | Intergenic |
| chr7  | 31570601  | 31571600  |         | Down | -1.87 | 4.99E-05 | 0.006239 | Intergenic |
| chr1  | 240200701 | 240201900 | Aph1b   | Down | -1.89 | 2.99E-05 | 0.004331 | Genebody   |
| chr1  | 74966701  | 74968200  | Sult2a2 | Down | -1.89 | 9.58E-05 | 0.00977  | Genebody   |
| chr14 | 49193901  | 49194900  |         | Down | -1.89 | 2.87E-07 | 0.00019  | Intergenic |
| chr8  | 71121501  | 71122500  | Vom2r18 | Down | -1.9  | 1.91E-07 | 0.000147 | Genebody   |
| chr6  | 138782701 | 138783800 |         | Down | -1.9  | 2.58E-07 | 0.000176 | Intergenic |

|       |           |           |          |      |       |          |          |            |
|-------|-----------|-----------|----------|------|-------|----------|----------|------------|
| chr1  | 111151301 | 111152300 |          | Down | -1.9  | 2.53E-05 | 0.003844 | Intergenic |
| chr1  | 75467601  | 75468600  |          | Down | -1.9  | 3.81E-05 | 0.005169 | Intergenic |
| chr1  | 74702201  | 74703200  | Sult2a2  | Down | -1.91 | 1.49E-07 | 0.000124 | Genebody   |
| chr6  | 50440801  | 50441800  |          | Down | -1.92 | 5.63E-08 | 5.38E-05 | Intergenic |
| chr4  | 167545201 | 167546200 |          | Down | -1.92 | 1.40E-06 | 0.000482 | Intergenic |
| chr1  | 61749001  | 61750000  | Sult1c2a | Down | -1.93 | 1.91E-06 | 0.000586 | Genebody   |
| chr1  | 243725901 | 243727300 | Vom2r63  | Down | -1.94 | 6.75E-08 | 6.32E-05 | Genebody   |
| chr9  | 1038301   | 1039300   | Cyp2c7   | Down | -1.95 | 7.45E-05 | 0.008255 | Genebody   |
| chr1  | 112485301 | 112486300 |          | Down | -1.97 | 2.70E-05 | 0.004028 | Intergenic |
| chr1  | 111674801 | 111675900 |          | Down | -1.97 | 3.06E-05 | 0.004402 | Intergenic |
| chr15 | 5356901   | 5358600   | Cyp2c7   | Down | -1.98 | 1.04E-07 | 9.21E-05 | Genebody   |
| chr1  | 74984801  | 74986000  | Hbb      | Down | -1.98 | 5.95E-05 | 0.00708  | Genebody   |
| chr4  | 167542801 | 167543800 |          | Down | -1.99 | 9.49E-08 | 8.51E-05 | Intergenic |
| chr7  | 18033401  | 18034400  |          | Down | -2.02 | 2.54E-07 | 0.000175 | Intergenic |
| chr7  | 18283901  | 18284900  |          | Down | -2.03 | 8.90E-06 | 0.001794 | Intergenic |
| chr8  | 42107401  | 42108400  |          | Down | -2.1  | 1.09E-07 | 9.62E-05 | Intergenic |
| chr1  | 244419701 | 244420700 | Cyp2c7   | Down | -2.24 | 2.10E-06 | 0.000624 | Genebody   |

er

er

er

er

romoter

er

er

er



romoter

er

er

er

romoter

er

er

er

romoter

romoter

er

er

er

romoter

er

er

er

romoter  
romoter

er

er

romoter

er

er

er

romoter

romoter

er

er

romoter

er

er

romoter

er

er

er

er

romoter

romoter

er

er

er

er  
er

romoter  
romoter  
er  
er

romoter  
er  
er

romoter  
er  
er  
er

er  
er

romoter

romoter  
er

er  
er  
er

romoter  
er  
er

er

romoter  
romoter  
er  
er  
er

romoter  
er

romoter  
romoter  
romoter  
er  
er  
er  
er  
er

er  
er

er

romoter  
er

er  
er  
er

er  
romoter

romoter

er

romoter

er

er

er

er

er

romoter

er

romoter

er

er

er

er

er  
er  
er  
er  
er

er  
er  
er

er  
er  
er  
er

omoter  
omoter  
omoter  
er  
er  
er  
er  
omoter  
omoter  
er  
er

omoter  
er  
er

er  
er  
er  
er  
er  
er  
er

romoter

er

er

er

er

er

er

er

er

romoter

er

er

er

er

er

er

romoter

er

er

er

er

er

er

er

romoter

er

er

er

er  
er

romoter  
romoter  
er  
er

er  
er  
er

er  
er  
er  
er  
er

romoter  
er  
er  
er  
er  
er

er

romoter  
romoter  
romoter



er  
er

romoter  
er

er  
er  
er  
er

er  
er  
er  
romoter  
er  
er  
er  
romoter  
er

er

er

er

er

۲۴

۲۴

۲۴

۲۴

۲۴

۲۴

۲۴

۲۴



er

er

er

۲۲

۲۲

۲۲

۲۲

۲۲

er  
er

er

er

er

er

er

er





۲۲

romoter

er  
er





er  
er















۲۱

۲۱





































er

romoter











romoter



er

er

er

romoter

er
